# Supplementary material
Source: publisher figshare collection journal article supplement (https://gsajournals.figshare.com/ndownloader/files/24332606)
Supplement: Supplementary file 1 [file 24332606]

## Sheet: Table S1
Table S1: Summary of genone-wide gene expression comparison between 40 h APF and 21 h APF pupal eyes
FlyBase ID	Gene	21 h APF mean FPKM (1.)	40 h APF mean FPKM (1.)	log2 (40 h APF/ 21 h APF) (2.)	q-value (3.)
FBgn0004783	Ccp84Aa	1.34805	0	-inf	0.0001994
FBgn0024249	cato	3.35717	0	-inf	0.0001994
FBgn0030494	Cpr12A	1.42267	0	-inf	0.0001994
FBgn0032335	CG14915	1.65309	0	-inf	0.0001994
FBgn0032519	CG16957	1.52012	0	-inf	0.0001994
FBgn0036871	CG14096	1.48034	0	-inf	0.0001994
FBgn0040487	BobA	1.31204	0	-inf	0.0001994
FBgn0040797	CG13066	3.3897	0	-inf	0.0001994		Notes:
FBgn0040799	CG13051	54.9667	0	-inf	0.0001994		1. FPKM = fragments per kilobase per million reads
FBgn0053687	CG33687	1.31772	0	-inf	0.0001994		2. log2 values = fold change in gene expression
FBgn0054007	CG34007	0.753596	0	-inf	0.0001994		3. q-value = false-discovery rate-corrected p-value; significant if <0.05, at 5% significance level.
FBgn0262686	CG43156	1.80793	0	-inf	0.0001994
FBgn0265920	CR44709	0.75258	0	-inf	0.0001994
FBgn0266211	CR44906	1.49942	0	-inf	0.0001994
FBgn0266769	CR45234	0.968086	0	-inf	0.0001994
FBgn0013348	TpnC41C	0	1.08156	inf	0.0001994
FBgn0030389	CG15927	0	11.0564	inf	0.0001994
FBgn0030826	CG12995	0	0.743992	inf	0.0001994
FBgn0032914	CG14397	0	1.27179	inf	0.0001994
FBgn0034842	Prosbeta5R1	0	1.1651	inf	0.0001994
FBgn0035875	Cpr66Cb	0	13.0529	inf	0.0001994
FBgn0036602	CG13042	0	0.736393	inf	0.0001994
FBgn0036780	CG7330	0	0.903477	inf	0.0001994
FBgn0038132	CG15887	0	3.33282	inf	0.0001994
FBgn0039199	CG13615	0	0.89413	inf	0.0001994
FBgn0039782	CG15539	0	1.61095	inf	0.0001994
FBgn0051326	CG31326	0	0.902952	inf	0.0001994
FBgn0051561	Osi16	0	8.86713	inf	0.0001994
FBgn0053110	CG33110	0	1.39367	inf	0.0001994
FBgn0053299	CG33299	0	1.52825	inf	0.0001994
FBgn0067905	IM14	0	11.8797	inf	0.0001994
FBgn0083951	CG34115	0	15.9017	inf	0.0001994
FBgn0262855	CG43219	0	1.08945	inf	0.0001994
FBgn0263215	CR43385	0	18.2522	inf	0.0001994
FBgn0263651	CR43642	0	0.94984	inf	0.0001994
FBgn0264551	CR43930	0	5.08827	inf	0.0001994
FBgn0265161	CR44230	0	1.14228	inf	0.0001994
FBgn0265300	CR44273	0	2.08819	inf	0.0001994
FBgn0265310	CR44283	0	0.764185	inf	0.0001994
FBgn0265839	CR44628	0	1.32447	inf	0.0001994
FBgn0266811	CR45273	0	29.3239	inf	0.0001994
FBgn0266956	CR45407	0	0.927396	inf	0.0001994
FBgn0267175	CR45615	0	5.12726	inf	0.0001994
FBgn0037414	Osi7	0.289781	485.631	10.7107	0.0001994
FBgn0066365	dyl	0.180323	265.977	10.5265	0.0001994
FBgn0037416	Osi9	1.68558	1957.8	10.1818	0.0001994
FBgn0038339	CG6118	0.214019	195.919	9.83831	0.0001994
FBgn0038439	Cad89D	0.0463283	30.5017	9.36278	0.0001994
FBgn0039686	CG15506	0.364633	208.898	9.16214	0.0001994
FBgn0035429	CG12017	0.203774	109.265	9.06664	0.0001994
FBgn0000448	Hr3	0.341441	174.187	8.99479	0.0001994
FBgn0036351	CG14107	0.362586	184.907	8.99426	0.0001994
FBgn0036352	CG14110	0.324966	108.592	8.38442	0.0001994
FBgn0261799	dsx-c73A	1.86811	622.126	8.37949	0.0001994
FBgn0039851	mey	0.508855	135.287	8.05455	0.0001994
FBgn0037992	CG4702	2.00785	524.225	8.02839	0.0001994
FBgn0037662	CG11997	5.02036	1296.21	8.0123	0.0001994
FBgn0037664	CG8420	1.33457	254.177	7.57331	0.0001994
FBgn0261714	Cpn	0.332186	63.1517	7.57069	0.0001994
FBgn0037323	CG2663	1.29081	241.572	7.54803	0.0001994
FBgn0033359	CG8213	0.73471	123.933	7.39817	0.0001994
FBgn0037411	Osi3	0.497838	65.0001	7.02862	0.0001994
FBgn0033731	Cpr49Ah	0.825951	104.576	6.98428	0.0001994
FBgn0037427	Osi17	0.162675	17.8372	6.77675	0.0001994
FBgn0264562	Hr4	1.59109	167.231	6.71568	0.0001994
FBgn0038422	CG14880	0.641007	59.788	6.54337	0.0001994
FBgn0040358	CG14625	0.325056	30.2156	6.53846	0.0001994
FBgn0031730	CG7236	0.503263	42.0497	6.38464	0.0001994
FBgn0037412	Osi4	8.17941	659.571	6.33339	0.0001994
FBgn0038420	CG10311	7.07907	569.416	6.32978	0.0001994
FBgn0033320	CG8586	1.10139	83.0284	6.23621	0.0001994
FBgn0052354	CG32354	13.4314	948.676	6.14224	0.0001994
FBgn0040359	CG11380	0.281225	18.5045	6.04	0.0001994
FBgn0033403	CG13739	0.213506	13.9826	6.03321	0.0001994
FBgn0039789	CG9717	0.457953	29.3011	5.99961	0.0001994
FBgn0035113	pyx	0.311291	19.2232	5.94844	0.0001994
FBgn0038072	CG6225	0.239004	14.661	5.9388	0.0001994
FBgn0002577	m	0.868418	49.6421	5.83703	0.0001994
FBgn0004511	dy	0.489654	27.5626	5.81481	0.0001994
FBgn0031957	TwdlE	4.01728	219.843	5.77411	0.0001994
FBgn0259821	CG42402	0.375059	19.9609	5.73391	0.0001994
FBgn0030617	CG9095	0.932255	49.4549	5.72924	0.0001994
FBgn0040600	CG13631	3.26052	169.039	5.69611	0.0001994
FBgn0028938	CG16886	0.321365	16.2522	5.66028	0.0001994
FBgn0032538	CG16885	1.69017	79.2707	5.55155	0.0001994
FBgn0069973	CG40485	3.47855	162.342	5.54441	0.0001994
FBgn0030001	cyr	0.915456	42.5353	5.53803	0.0001994
FBgn0036680	Cpr73D	1.00235	44.1341	5.46043	0.0001994
FBgn0085395	Shawl	0.514102	22.5118	5.45249	0.0001994
FBgn0016047	nompA	1.03609	43.157	5.38037	0.0001994
FBgn0266066	CR44819	0.512986	20.1645	5.29676	0.0001994
FBgn0038676	CG6026	1.13869	44.3702	5.28414	0.0001994
FBgn0263216	CG43386	0.619531	23.9335	5.27171	0.0001994
FBgn0052547	CG32547	0.0778455	2.99206	5.26438	0.0001994
FBgn0000038	nAChRbeta1	2.44181	88.016	5.17174	0.0001994
FBgn0031630	CG15629	2.05819	69.202	5.07137	0.0001994
FBgn0036493	CG7255	0.0962017	3.19902	5.05542	0.0001994
FBgn0033252	CG12769	1.28408	42.4496	5.04695	0.0001994
FBgn0033363	CG13744	1.30158	42.6269	5.03343	0.0001994
FBgn0039527	CG5639	0.311596	10.1824	5.03026	0.0001994
FBgn0259732	tal-3A	7.02522	228.792	5.02535	0.0001994
FBgn0260479	CG31904	0.182336	5.91113	5.01877	0.0001994
FBgn0260657	CG42540	1.21757	39.3361	5.01378	0.0001994
FBgn0003429	slo	2.77131	87.6198	4.98262	0.0001994
FBgn0262111	f	1.53258	46.8555	4.93418	0.0001994
FBgn0028573	prc	0.198906	6.06752	4.93095	0.0001994
FBgn0034623	CG9822	0.839511	25.5155	4.92568	0.0001994
FBgn0011206	bol	1.29089	39.1869	4.92393	0.0001994
FBgn0040823	dpr6	1.18146	35.5671	4.9119	0.0001994
FBgn0037993	dpr15	0.179491	5.38062	4.90579	0.0001994
FBgn0032803	CG13082	85.4731	2444.52	4.83794	0.0001994
FBgn0039167	CG17786	1.95389	55.5055	4.82821	0.0001994
FBgn0284435	tyn	83.9838	2368.07	4.81746	0.0001994
FBgn0011828	Pxn	1.91633	53.4173	4.80089	0.0001994
FBgn0039078	CG4374	1.07961	28.9214	4.74355	0.0001994
FBgn0034030	CG8192	0.608403	15.992	4.71618	0.0001994
FBgn0033887	St4	0.4163	10.8114	4.69878	0.0001994
FBgn0030317	CG1561	4.57203	117.897	4.68855	0.0001994
FBgn0040877	CG12994	0.995288	24.4936	4.62115	0.0001994
FBgn0034716	Oatp58Dc	0.0935993	2.28094	4.60698	0.0001994
FBgn0264339	CG43795	0.102039	2.46322	4.59335	0.0001994
FBgn0259210	prom	8.45333	194.571	4.52463	0.0001994
FBgn0004244	Rdl	1.64268	37.43	4.51008	0.0001994
FBgn0062978	CG31808	12.3777	280.759	4.50352	0.0001994
FBgn0030798	CG13003	0.5425	12.226	4.49418	0.0001994
FBgn0050456	CG30456	0.889893	19.7914	4.4751	0.0001994
FBgn0038693	unc79	0.96313	20.5554	4.41564	0.0001994
FBgn0051708	DIP-zeta	0.0935084	1.9702	4.3971	0.0001994
FBgn0015591	AstA	0.204897	4.31445	4.3962	0.0001994
FBgn0034391	CG15080	1.1816	24.3838	4.36712	0.0001994
FBgn0001296	kar	7.15193	146.664	4.35803	0.0001994
FBgn0038958	CG13857	0.958617	19.578	4.35213	0.0001994
FBgn0010383	Cyp18a1	0.635054	12.9449	4.34936	0.0001994
FBgn0035385	FMRFaR	0.3253	6.62055	4.34711	0.0001994
FBgn0034499	Cpr56F	1.97714	40.1385	4.3435	0.0001994
FBgn0030778	CG4678	1.6724	33.9287	4.34251	0.0001994
FBgn0263256	CG43394	1.70738	34.2962	4.32819	0.0001994
FBgn0259111	Ndae1	3.2827	65.5348	4.3193	0.0001994
FBgn0016075	vkg	1.7596	34.6831	4.30091	0.0001994
FBgn0037521	CG2993	0.950478	18.6288	4.29274	0.0001994
FBgn0002938	ninaC	7.26129	139.162	4.26039	0.0001994
FBgn0260234	Xport-B	4.4242	84.3687	4.25322	0.0001994
FBgn0034693	CG11073	0.829201	15.7225	4.24497	0.0001994
FBgn0263413	CR43459	0.111258	2.0972	4.23648	0.0001994
FBgn0036619	Cpr72Ec	0.613752	11.508	4.22884	0.0001994
FBgn0031414	eys	1.60953	29.6399	4.20283	0.0001994
FBgn0261804	CG42750	0.465643	8.45543	4.18258	0.0001994
FBgn0013995	Calx	0.232281	4.08706	4.13712	0.0001994
FBgn0263973	jv	2.32999	40.8021	4.13025	0.0001994
FBgn0261999	CG42817	0.410459	7.18593	4.12986	0.0001994
FBgn0085387	shakB	3.98478	69.7038	4.12867	0.0001994
FBgn0285944	para	0.946451	16.4873	4.12268	0.0001994
FBgn0038946	rdhB	28.7669	496.942	4.1106	0.0001994
FBgn0034143	CG8303	1.01101	17.4421	4.1087	0.0001994
FBgn0034022	CG12964	1.13047	19.4231	4.10277	0.0001994
FBgn0051637	CG31637	21.2155	362.972	4.09667	0.0001994
FBgn0038749	Xport-A	9.05539	148.699	4.03748	0.0001994
FBgn0032652	CG6870	2.01251	32.8543	4.02901	0.0001994
FBgn0052333	CG32333	4.96917	79.5117	4.00009	0.0001994
FBgn0031258	CG4297	1.42723	22.3468	3.96878	0.0001994
FBgn0010263	Rbp9	10.6051	163.4	3.94558	0.0001994
FBgn0034861	CG9815	2.96019	45.4903	3.94179	0.0001994
FBgn0036851	CG14082	0.129228	1.96815	3.92885	0.0001994
FBgn0000037	mAChR-A	0.495953	7.5489	3.92799	0.0001994
FBgn0000075	amd	2.29341	34.3738	3.90575	0.0001994
FBgn0264087	Slob	3.10243	46.278	3.89886	0.0001994
FBgn0033448	hebe	2.75692	40.6791	3.88316	0.0001994
FBgn0266429	AstA-R1	0.101422	1.48774	3.87468	0.0001994
FBgn0037163	laza	1.25802	18.1766	3.85285	0.0001994
FBgn0002936	ninaA	2.95419	42.4609	3.8453	0.0001994
FBgn0039795	Spn100A	19.2462	269.997	3.8103	0.0001994
FBgn0036583	CG13055	1.33385	18.629	3.80388	0.0001994
FBgn0034530	Rcd6	3.71813	51.8836	3.80263	0.0001994
FBgn0050502	fa2h	8.01945	109.853	3.77592	0.0001994
FBgn0001981	esg	11.3561	154.892	3.76973	0.0001994
FBgn0039490	CG5882	0.127584	1.69364	3.73061	0.0001994
FBgn0033753	Cyp301a1	6.5003	85.6732	3.72027	0.0001994
FBgn0032338	CG16854	2.46622	32.2846	3.71048	0.0001994
FBgn0032856	CG16798	36.9245	481.537	3.705	0.0001994
FBgn0000451	ect	35.6016	456.885	3.68182	0.0001994
FBgn0051706	CG31706	0.459982	5.89333	3.67943	0.0001994
FBgn0264908	pHCl-1	2.12791	27.263	3.67943	0.0001994
FBgn0011582	Dop1R1	0.534092	6.74997	3.65972	0.0001994
FBgn0262867	Ptr	2.91036	36.6478	3.65445	0.0001994
FBgn0010246	Myo61F	0.694513	8.72733	3.65147	0.0001994
FBgn0039536	unc80	0.674871	8.46533	3.64888	0.0001994
FBgn0051636	CG31636	1.59511	19.9373	3.64374	0.0001994
FBgn0015569	alpha-Est10	1.546	19.2164	3.63572	0.0001994
FBgn0266859	CR45320	1.84054	22.7934	3.63042	0.0001994
FBgn0259226	CG42326	0.529055	6.51137	3.62147	0.0001994
FBgn0035170	dpr20	0.855745	10.483	3.61473	0.0001994
FBgn0000489	Pka-C3	3.87018	47.2472	3.60976	0.0001994
FBgn0263118	tx	4.375	53.2993	3.60676	0.0001994
FBgn0030884	CG6847	2.07952	25.0968	3.59318	0.0001994
FBgn0032593	Trpgamma	0.863605	10.4144	3.59206	0.0001994
FBgn0051559	CG31559	3.13196	37.7678	3.59202	0.0001994
FBgn0046258	CG12880	75.0965	902.912	3.58777	0.0001994
FBgn0038874	ETHR	0.309569	3.71015	3.58314	0.0001994
FBgn0020907	Scp2	4.11449	49.1853	3.57944	0.0001994
FBgn0032797	Hasp	1.36673	16.2573	3.57229	0.0001994
FBgn0037410	Osi2	0.677092	7.97843	3.55868	0.0001994
FBgn0034731	CG10384	1.10738	13.0334	3.55699	0.0001994
FBgn0038073	CG14395	0.501475	5.87113	3.54939	0.0001994
FBgn0030367	Cyp311a1	1.28359	14.9488	3.54178	0.0001994
FBgn0033958	jef	0.55954	6.48255	3.53425	0.0001994
FBgn0036860	CG14086	0.725486	8.31602	3.51887	0.0001994
FBgn0031918	CG6055	1.55034	17.6725	3.51085	0.0001994
FBgn0261509	haf	2.56284	29.0211	3.50129	0.0001994
FBgn0263980	CG43729	1.42874	16.0852	3.49292	0.0001994
FBgn0039380	CG5890	0.589367	6.57964	3.48077	0.0001994
FBgn0031855	CG11221	0.173731	1.93059	3.47411	0.0001994
FBgn0052432	CG32432	0.833126	9.25741	3.474	0.0001994
FBgn0031821	KFase	6.86294	76.0882	3.47077	0.0001994
FBgn0029681	CG15239	5.17051	57.0523	3.46391	0.0001994
FBgn0085385	bma	1.17534	12.8599	3.45173	0.0001994
FBgn0036368	CG10738	0.425045	4.62398	3.44345	0.0001994
FBgn0083970	CG34134	12.0254	129.956	3.43386	0.0001994
FBgn0042711	Hex-t1	0.267469	2.88867	3.43296	0.0001994
FBgn0001134	Grd	0.152339	1.64192	3.43003	0.0001994
FBgn0028875	nAChRalpha5	0.884934	9.46108	3.41836	0.0001994
FBgn0013467	igl	6.98758	74.3599	3.41166	0.0001994
FBgn0266137	Dop1R2	0.11094	1.15731	3.38292	0.0001994
FBgn0004514	Oct-TyrR	0.132193	1.37525	3.37897	0.0001994
FBgn0038063	Octbeta2R	0.273293	2.82656	3.37053	0.0001994
FBgn0033668	exp	2.21113	22.6021	3.3536	0.0001994
FBgn0037448	CG15186	3.59034	36.2053	3.33401	0.0001994
FBgn0085407	Pvf3	8.04207	80.742	3.32768	0.0001994
FBgn0031568	CG10019	1.09777	10.8523	3.30535	0.0001994
FBgn0015801	Reg-5	10.4952	103.213	3.29782	0.0001994
FBgn0034356	CG10924	7.68911	75.4005	3.29369	0.0001994
FBgn0283471	wupA	0.158659	1.53025	3.26976	0.0001994
FBgn0039770	CG15537	0.533837	5.14289	3.26811	0.0001994
FBgn0035010	CG13579	0.506639	4.82945	3.25283	0.0001994
FBgn0025390	Mur2B	1.81501	16.9997	3.22746	0.0001994
FBgn0265052	St3	1.01816	9.49137	3.22065	0.0001994
FBgn0027074	CG17324	2.23669	20.8132	3.21806	0.0001994
FBgn0030927	CG15046	5.25252	48.8119	3.21615	0.0001994
FBgn0037941	CG12594	4.16871	38.4779	3.20636	0.0001994
FBgn0004865	Eip78C	18.6501	170.019	3.18844	0.0001994
FBgn0038494	beat-IIb	4.87932	44.2604	3.18127	0.0001994
FBgn0011722	Tig	0.820925	7.42128	3.17635	0.0001994
FBgn0038260	CG14855	1.29872	11.7393	3.17618	0.0001994
FBgn0262593	Shab	0.728562	6.50513	3.15845	0.0001994
FBgn0035708	CG8398	0.253238	2.24659	3.14917	0.0001994
FBgn0040805	CG12355	0.864011	7.65791	3.14783	0.0001994
FBgn0014930	CG2846	28.564	251.625	3.13901	0.0001994
FBgn0259150	CG42265	3.81723	33.6116	3.13836	0.0001994
FBgn0260660	Mp	11.5158	100.805	3.12988	0.0001994
FBgn0032021	CG7781	12.9197	112.726	3.12517	0.0001994
FBgn0010114	hig	4.23901	36.8934	3.12156	0.0001994
FBgn0032836	CG10680	12.7724	111.14	3.12128	0.0001994
FBgn0005619	Hdc	0.317048	2.75855	3.12113	0.0001994
FBgn0262717	Skeletor	10.2438	88.7396	3.11483	0.0001994
FBgn0085426	Rgk3	0.163458	1.4145	3.1133	0.0001994
FBgn0087005	rtp	23.383	201.786	3.1093	0.0001994
FBgn0261085	Syt12	0.946839	8.15028	3.10566	0.0001994
FBgn0039647	CG14509	3.95723	33.7988	3.09441	0.0001994
FBgn0001258	ImpL3	0.631497	5.36114	3.08569	0.0001994
FBgn0039756	CG9743	0.636487	5.40106	3.08504	0.0001994
FBgn0002778	mnd	3.05882	25.9223	3.08314	0.0001994
FBgn0038246	CG14853	2.43798	20.5824	3.07765	0.0001994
FBgn0030964	Pvf1	1.2343	10.4059	3.07564	0.0001994
FBgn0284408	trol	11.6948	98.5131	3.07445	0.0001994
FBgn0004117	Tm2	0.191868	1.59868	3.0587	0.0001994
FBgn0264503	CG43902	3.79544	31.5985	3.05752	0.0001994
FBgn0085410	TrissinR	0.482502	4.00293	3.05245	0.0001994
FBgn0037676	CG8861	0.401568	3.32409	3.04924	0.0001994
FBgn0085447	sif	5.11812	42.2877	3.04655	0.0001994
FBgn0028572	qtc	18.529	151.435	3.03084	0.0001994
FBgn0030027	CG1632	4.0728	33.2097	3.02751	0.0001994
FBgn0030897	Frq1	1.27322	10.2861	3.01414	0.0001994
FBgn0053516	dpr3	0.661566	5.33723	3.01213	0.0001994
FBgn0263257	Cngl	1.78182	14.2503	2.99957	0.0001994
FBgn0263109	CG43366	18.8624	150.548	2.99663	0.0001994
FBgn0038839	Ktl	1.7231	13.6497	2.98579	0.0001994
FBgn0264979	CG4267	0.306363	2.42009	2.98175	0.0001994
FBgn0038938	CG7084	0.178616	1.40067	2.97118	0.0001994
FBgn0032734	CG15169	1.30751	10.251	2.97087	0.0001994
FBgn0035398	Cht7	8.35618	65.2298	2.96462	0.0001994
FBgn0264000	GluRIB	1.10797	8.459	2.93256	0.0001994
FBgn0032840	sNPF	70.1433	534.583	2.93004	0.0001994
FBgn0032706	Irk3	1.71253	13.0251	2.9271	0.0001994
FBgn0031515	CG9664	2.63352	19.8578	2.91464	0.0001994
FBgn0000299	Col4a1	7.70219	57.6035	2.90282	0.0001994
FBgn0032136	Apoltp	1.14354	8.4751	2.88973	0.0001994
FBgn0050418	nord	0.72045	5.33389	2.88822	0.0001994
FBgn0029746	CG15465	2.00172	14.73	2.87944	0.0001994
FBgn0003382	sha	0.984228	7.24239	2.8794	0.0001994
FBgn0038261	CG14856	0.250228	1.83933	2.87787	0.0001994
FBgn0003162	Pu	9.95519	72.7506	2.86944	0.0001994
FBgn0020445	E23	6.40553	46.5586	2.86166	0.0001994
FBgn0250839	CG2016	18.9178	136.427	2.85031	0.0001994
FBgn0035427	ckd	3.53922	25.5108	2.8496	0.0001994
FBgn0264390	CR43838	0.579024	4.16483	2.84656	0.0001994
FBgn0264753	Rgk1	1.9455	13.981	2.84525	0.0001994
FBgn0038606	CG15803	1.85734	13.3084	2.84102	0.0001994
FBgn0003965	v	3.71604	26.6163	2.84047	0.0001994
FBgn0044328	CG32052	3.63556	25.9469	2.83532	0.0001994
FBgn0015039	Cyp9b2	0.509543	3.60301	2.82193	0.0001994
FBgn0038511	cysu	1.61511	11.3383	2.8115	0.0001994
FBgn0036260	Rh7	0.540856	3.78979	2.8088	0.0001994
FBgn0260658	CG42541	2.8428	19.741	2.79581	0.0001994
FBgn0263846	CG43707	1.35509	9.36535	2.78895	0.0001994
FBgn0000036	nAChRalpha1	0.993253	6.82489	2.78057	0.0001994
FBgn0039420	CG6154	0.805598	5.52375	2.77751	0.0001994
FBgn0039584	beat-VI	2.97671	20.3923	2.77623	0.0001994
FBgn0267431	Myo81F	0.278789	1.90458	2.77222	0.0001994
FBgn0263038	CG43333	0.464985	3.16434	2.76665	0.0001994
FBgn0262869	Gfrl	3.68387	24.7898	2.75045	0.0001994
FBgn0037717	CG8301	2.71508	18.2633	2.74988	0.0001994
FBgn0039915	Gat	7.53269	50.5992	2.74788	0.0001994
FBgn0023534	CG17778	2.26548	15.2051	2.74666	0.0001994
FBgn0033574	Spn47C	2.97175	19.9411	2.74636	0.0001994
FBgn0053178	CG33178	6.53766	43.8355	2.74525	0.0001994
FBgn0035430	CG12009	0.64435	4.29621	2.73715	0.0001994
FBgn0261549	rdgA	7.15114	47.4712	2.73081	0.0001994
FBgn0262562	CG43102	2.24693	14.8902	2.72834	0.0001994
FBgn0051522	CG31522	14.5086	95.4789	2.71828	0.0001994
FBgn0038542	TyrR	0.157198	1.03424	2.71792	0.0001994
FBgn0013771	Cyp6a9	0.539337	3.53518	2.71252	0.0001994
FBgn0267089	CR45533	0.204685	1.32889	2.69875	0.0001994
FBgn0033483	egr	7.71349	49.9978	2.69641	0.0001994
FBgn0261990	CG42808	1.71871	11.1174	2.69342	0.0001994
FBgn0027608	CG2082	16.3228	105.326	2.6899	0.0001994
FBgn0010611	Hmgs	25.176	162.281	2.68837	0.0001994
FBgn0026255	clumsy	0.124556	0.800785	2.68462	0.0001994
FBgn0039064	CG4467	4.2677	27.1066	2.66711	0.0001994
FBgn0017561	Ork1	0.347554	2.19916	2.66165	0.0001994
FBgn0034103	prim	2.6557	16.7512	2.6571	0.0001994
FBgn0034580	Cht8	1.92519	12.1149	2.65371	0.0001994
FBgn0050154	CG30154	21.0944	132.361	2.64955	0.0001994
FBgn0259167	CG42272	2.32585	14.5803	2.6482	0.0001994
FBgn0052982	CG32982	14.7586	92.4638	2.64733	0.0001994
FBgn0005626	ple	0.221008	1.3824	2.645	0.0001994
FBgn0039232	sosie	0.944206	5.86379	2.63466	0.0001994
FBgn0058470	CG40470	0.387098	2.40259	2.63382	0.0001994
FBgn0038143	CG9813	12.0488	74.7034	2.63228	0.0001994
FBgn0022160	Gpo-1	3.85577	23.8669	2.62992	0.0001994
FBgn0032010	CG8086	8.9878	55.6266	2.62973	0.0001994
FBgn0038784	CG4362	0.964071	5.95494	2.62688	0.0001994
FBgn0032804	CG13081	201.875	1245.34	2.625	0.0001994
FBgn0028496	CG30116	0.624958	3.84759	2.62213	0.0001994
FBgn0037683	CG18473	0.974406	5.9971	2.62167	0.0001994
FBgn0038957	CG7059	1.6523	10.1678	2.62146	0.0001994
FBgn0261698	SLO2	1.36398	8.37411	2.61812	0.0001994
FBgn0026721	fat-spondin	4.86452	29.8131	2.61558	0.0001994
FBgn0029922	CG14431	2.14712	13.1448	2.61402	0.0001994
FBgn0266690	CR45180	1.09261	6.64047	2.6035	0.0001994
FBgn0085382	CG34353	5.73396	34.8003	2.60149	0.0001994
FBgn0285926	Imp	4.87038	29.4941	2.59832	0.0001994
FBgn0034389	Mctp	0.572752	3.4463	2.58907	0.0001994
FBgn0051344	CG31344	11.197	67.2645	2.58673	0.0001994
FBgn0050158	CG30158	0.273211	1.63851	2.58429	0.0001994
FBgn0029974	dpr14	1.68818	10.1128	2.58265	0.0001994
FBgn0029864	CG15894	4.83099	28.7376	2.57255	0.0001994
FBgn0262018	CadN2	0.471266	2.8003	2.57097	0.0001994
FBgn0032129	jp	0.301668	1.78125	2.56186	0.0001994
FBgn0011286	RyR	0.55332	3.26215	2.55964	0.0001994
FBgn0051145	CG31145	2.7609	16.2232	2.55484	0.0001994
FBgn0262870	axo	3.76874	22.0613	2.54936	0.0001994
FBgn0034974	CG16786	6.97726	40.8382	2.54918	0.0001994
FBgn0285912	mah	65.0265	378.605	2.54159	0.0001994
FBgn0261526	NT1	31.7529	184.084	2.53541	0.0001994
FBgn0083975	Nlg4	1.08122	6.21411	2.52289	0.0001994
FBgn0259245	DIP-beta	1.8631	10.6748	2.51843	0.0001994
FBgn0038653	CG18208	0.705825	4.0357	2.51544	0.0001994
FBgn0030805	wus	20.6891	118.126	2.51339	0.0001994
FBgn0037012	Rcd2	1.10862	6.31565	2.51016	0.0001994
FBgn0262483	Rbp	1.93582	10.9267	2.49684	0.0001994
FBgn0028397	Tob	1.34179	7.55735	2.49372	0.0001994
FBgn0050285	CG30285	11.3683	64.0052	2.49317	0.0001994
FBgn0028704	Nckx30C	0.588073	3.30796	2.49188	0.0001994
FBgn0260386	mtg	4.20881	23.6364	2.48953	0.0001994
FBgn0037698	CG16779	0.888444	4.98758	2.48899	0.0001994
FBgn0011746	ana	1.63235	9.16173	2.48867	0.0001994
FBgn0033362	CG8172	0.678974	3.78938	2.48053	0.0001994
FBgn0030895	CG7135	14.8733	82.8234	2.47732	0.0001994
FBgn0259175	ome	3.70265	20.6114	2.47682	0.0001994
FBgn0266348	CR44997	1.30555	7.22136	2.46762	0.0001994
FBgn0016694	Pdp1	5.73868	31.7349	2.46728	0.0001994
FBgn0039852	nyo	12.9927	71.7373	2.46502	0.0001994
FBgn0004852	Ac76E	0.169592	0.93245	2.45896	0.0001994
FBgn0038273	CG14860	2.76696	15.184	2.45618	0.0001994
FBgn0001223	Hsp22	118.199	647.045	2.45265	0.0001994
FBgn0025827	CG6421	3.04445	16.654	2.45162	0.0001994
FBgn0034583	CG10527	45.9391	250.136	2.44492	0.0001994
FBgn0039805	Cpr100A	16.9244	91.876	2.44059	0.0001994
FBgn0034145	CG5065	13.8757	74.8707	2.43184	0.0001994
FBgn0031530	pgant2	13.6553	72.3859	2.40624	0.0001994
FBgn0053548	SmydA-8	2.66544	14.1236	2.40566	0.0001994
FBgn0011589	Elk	0.480442	2.54485	2.40515	0.0001994
FBgn0267792	rgr	9.30639	49.2886	2.40496	0.0001994
FBgn0001229	Hsp67Bc	122.303	647.572	2.40458	0.0001994
FBgn0259110	mmd	7.0519	37.2719	2.402	0.0001994
FBgn0033405	CG13954	0.334554	1.76081	2.39593	0.0001994
FBgn0024963	GluClalpha	12.6236	66.4067	2.3952	0.0001994
FBgn0027654	jdp	2.77312	14.5595	2.39238	0.0001994
FBgn0032911	tadr	5.09402	26.6532	2.38743	0.0001994
FBgn0024944	Oamb	3.11815	16.2931	2.3855	0.0001994
FBgn0037730	CG9444	1.6887	8.76719	2.3762	0.0001994
FBgn0036044	Zasp67	0.509606	2.64521	2.37593	0.0001994
FBgn0027843	CAH2	4.90693	25.4308	2.37368	0.0001994
FBgn0032143	CG4017	0.671559	3.47693	2.37223	0.0001994
FBgn0263077	CG43340	14.2364	73.6457	2.37102	0.0001994
FBgn0050438	CG30438	1.59269	8.20004	2.36417	0.0001994
FBgn0037044	CG10585	10.3902	53.2837	2.35847	0.0001994
FBgn0035975	PGRP-LA	6.96503	35.7167	2.3584	0.0001994
FBgn0086675	fne	18.2002	93.2345	2.35691	0.0001994
FBgn0051361	dpr17	1.59842	8.17294	2.35421	0.0001994
FBgn0010414	SerT	0.447971	2.28904	2.35326	0.0001994
FBgn0260753	Pdfr	0.742075	3.78848	2.35198	0.0001994
FBgn0037186	CG11241	1.13328	5.77991	2.35055	0.0001994
FBgn0259677	CG42346	3.91797	19.9786	2.35028	0.0001994
FBgn0083974	CG34138	11.1688	56.8598	2.34793	0.0001994
FBgn0037164	CG11438	4.00353	20.35	2.34568	0.0001994
FBgn0010329	Tbh	0.77595	3.92409	2.33832	0.0001994
FBgn0037546	mAChR-B	0.849767	4.29261	2.33672	0.0001994
FBgn0259222	CG42322	2.5533	12.8889	2.33569	0.0001994
FBgn0034253	CG10936	21.3821	107.708	2.33265	0.0001994
FBgn0039178	CG6356	10.8533	54.5379	2.32913	0.0001994
FBgn0000039	nAChRalpha2	2.95045	14.7889	2.32551	0.0001994
FBgn0022355	Tsf1	205.865	1031.88	2.32551	0.0001994
FBgn0037409	Osi24	3.72924	18.6735	2.32404	0.0001994
FBgn0029804	CG3097	4.88045	24.2607	2.31354	0.0001994
FBgn0051774	fred	4.23753	20.8757	2.30053	0.0001994
FBgn0004456	mew	11.1491	54.8531	2.29865	0.0001994
FBgn0264494	CG17646	8.11108	39.6808	2.29048	0.0001994
FBgn0052506	CG32506	1.68317	8.224	2.28866	0.0001994
FBgn0004622	TkR99D	4.98389	24.2346	2.28172	0.0001994
FBgn0083972	CG34136	12.8986	62.6589	2.2803	0.0001994
FBgn0027610	Dic1	10.9007	52.7735	2.27539	0.0001994
FBgn0033355	CG13748	12.9289	62.5485	2.27437	0.0001994
FBgn0034417	CG15117	8.98444	43.0089	2.25914	0.0001994
FBgn0036679	CG13022	126.65	605.405	2.25706	0.0001994
FBgn0038837	CG3822	10.7671	51.4596	2.25681	0.0001994
FBgn0259241	CG42339	3.05879	14.5373	2.24872	0.0001994
FBgn0263111	cac	10.7306	50.7494	2.24166	0.0001994
FBgn0051634	Oatp26F	9.05547	42.712	2.23778	0.0001994
FBgn0037146	CG7470	0.259213	1.21922	2.23375	0.0001994
FBgn0011653	mas	11.7959	55.4711	2.23345	0.0001994
FBgn0038660	CG14291	23.1787	108.691	2.22935	0.0001994
FBgn0029881	pigs	6.28027	29.387	2.22628	0.0001994
FBgn0083228	Frq2	3.00573	14.0545	2.22524	0.0001994
FBgn0030304	Cyp4g15	6.16574	28.7437	2.2209	0.0001994
FBgn0085383	CG34354	1.85743	8.616	2.21371	0.0001994
FBgn0261928	CG42795	3.10633	14.3054	2.20328	0.0001994
FBgn0038407	CG6126	5.22513	24.0194	2.20066	0.0001994
FBgn0020372	TM4SF	4.13209	18.9608	2.19808	0.0001994
FBgn0263346	CG43427	46.665	213.685	2.19508	0.0001994
FBgn0085380	CG34351	0.911141	4.17041	2.19444	0.0001994
FBgn0031005	Hs3st-B	5.87504	26.8664	2.19313	0.0001994
FBgn0033365	CG8170	0.310939	1.41106	2.18208	0.0001994
FBgn0030912	CG6023	3.11223	14.0939	2.17905	0.0001994
FBgn0003159	CG2841	7.603	34.3206	2.17443	0.0001994
FBgn0033437	CG12926	2.19751	9.9058	2.17241	0.0001994
FBgn0014396	tim	3.90995	17.5275	2.1644	0.0001994
FBgn0261871	dpr2	0.592436	2.65323	2.16302	0.0001994
FBgn0033196	CG1358	1.66748	7.45389	2.16032	0.0001994
FBgn0039084	CG10175	0.372575	1.66532	2.1602	0.0001994
FBgn0266579	tau	44.6628	198.457	2.15168	0.0001994
FBgn0264307	orb2	10.326	45.8655	2.15113	0.0001994
FBgn0036942	CG7328	1.76051	7.79297	2.14618	0.0001994
FBgn0039098	GILT3	2.29169	10.1407	2.14568	0.0001994
FBgn0037167	CG11425	4.31751	19.0295	2.13997	0.0001994
FBgn0033872	CG6329	64.6188	284.03	2.13602	0.0001994
FBgn0259994	CG42492	52.3271	229.97	2.13581	0.0001994
FBgn0267428	CG45781	1.12424	4.92645	2.13159	0.0001994
FBgn0034117	CG7997	6.90512	30.2484	2.13112	0.0001994
FBgn0032414	CG17211	27.5965	120.721	2.12912	0.0001994
FBgn0040532	CG8369	8.53971	37.2654	2.12558	0.0001994
FBgn0036688	Fit2	10.117	44.1431	2.12541	0.0001994
FBgn0051719	RluA-1	0.69964	3.03925	2.11903	0.0001994
FBgn0033817	GstE14	10.0247	43.4437	2.11559	0.0001994
FBgn0051814	CG31814	0.872231	3.77616	2.11414	0.0001994
FBgn0031886	Nuf2	6.85124	29.5291	2.1077	0.0001994
FBgn0034638	CG10433	7.77786	33.3375	2.0997	0.0001994
FBgn0016076	vri	35.8147	152.999	2.0949	0.0001994
FBgn0265002	CG44153	0.467224	1.99489	2.09413	0.0001994
FBgn0003386	Shaw	7.63638	32.4811	2.08864	0.0001994
FBgn0265575	yin	0.746031	3.16469	2.08476	0.0001994
FBgn0086408	stl	12.684	53.7	2.08191	0.0001994
FBgn0085250	CG34221	10.3792	43.9332	2.08162	0.0001994
FBgn0001149	GstD1	256.088	1082.19	2.07924	0.0001994
FBgn0030164	CG1889	1.28205	5.4007	2.07469	0.0001994
FBgn0026439	Eaat1	5.29517	22.2841	2.07327	0.0001994
FBgn0053196	dpy	3.46434	14.5623	2.07159	0.0001994
FBgn0030251	CG2145	9.41716	39.4665	2.06727	0.0001994
FBgn0000206	boss	9.53293	39.8682	2.06425	0.0001994
FBgn0041150	hoe1	1.69646	7.09166	2.0636	0.0001994
FBgn0032402	CG14945	1.94864	8.0955	2.05465	0.0001994
FBgn0034999	CG3394	3.52216	14.5841	2.04986	0.0001994
FBgn0259247	laccase2	28.6121	118.084	2.04512	0.0001994
FBgn0000008	a	10.1684	41.9632	2.04504	0.0001994
FBgn0019643	Dat	8.65897	35.5112	2.03601	0.0001994
FBgn0040726	dpr1	6.28579	25.777	2.03592	0.0001994
FBgn0030587	CG9522	11.0727	45.3293	2.03344	0.0001994
FBgn0014141	cher	13.3384	54.3431	2.02651	0.0001994
FBgn0038198	Npc2b	38.9036	158.071	2.0226	0.0001994
FBgn0038498	beat-IIa	6.14046	24.734	2.01008	0.0001994
FBgn0031602	CG15431	1.4465	5.80841	2.00558	0.0001994
FBgn0004118	nAChRbeta2	8.1491	32.6049	2.00038	0.0001994
FBgn0034972	CG10339	0.510017	2.03496	1.99639	0.0001994
FBgn0015766	Msr-110	26.5753	105.912	1.99471	0.0001994
FBgn0053143	CG33143	7.92079	31.5668	1.99469	0.0001994
FBgn0085419	Rgk2	18.6203	73.8528	1.98778	0.0001994
FBgn0039272	CG11836	2.64481	10.4396	1.98083	0.0001994
FBgn0038020	GstD9	4.91514	19.3576	1.9776	0.0001994
FBgn0033132	Tsp42Ej	54.4204	214.135	1.97631	0.0001994
FBgn0031490	CG17264	27.7337	109.093	1.97584	0.0001994
FBgn0266354	CG45002	2.52376	9.83442	1.96227	0.0001994
FBgn0085399	CG34370	8.26366	32.1524	1.96007	0.0001994
FBgn0000083	AnxB9	73.8142	286.142	1.95476	0.0001994
FBgn0036225	CG5883	19.9953	77.3962	1.9526	0.0001994
FBgn0039844	CG1607	7.278	28.1002	1.94897	0.0001994
FBgn0023023	CRMP	83.8945	323.251	1.94601	0.0001994
FBgn0038256	CG7530	3.62398	13.9602	1.94567	0.0001994
FBgn0050172	CG30172	43.8884	168.198	1.93825	0.0001994
FBgn0004652	fru	1.92456	7.36023	1.93523	0.0001994
FBgn0015034	Cyp4e1	16.9766	64.9144	1.93499	0.0001994
FBgn0011818	oaf	17.3732	66.2869	1.93186	0.0001994
FBgn0031939	CG13796	1.04557	3.98031	1.9286	0.0001994
FBgn0039075	CG4393	4.39938	16.7186	1.92608	0.0001994
FBgn0028645	beat-Ib	0.810515	3.07971	1.92588	0.0001994
FBgn0031866	Nlg2	4.17796	15.7576	1.91518	0.0001994
FBgn0027589	CG1688	10.3874	38.8705	1.90384	0.0001994
FBgn0036224	Rpt4R	16.7789	62.7681	1.90339	0.0001994
FBgn0030603	CG5541	8.58124	31.7898	1.8893	0.0001994
FBgn0036288	CG10660	2.86371	10.5979	1.88782	0.0001994
FBgn0086367	t	25.3095	93.296	1.88214	0.0001994
FBgn0031689	Cyp28d1	1.23902	4.55683	1.87883	0.0001994
FBgn0085427	CG34398	21.3852	78.3073	1.87253	0.0001994
FBgn0265595	CG44422	2.32622	8.51236	1.87157	0.0001994
FBgn0027529	tapas	28.035	102.548	1.87099	0.0001994
FBgn0037798	CG12817	11.447	41.708	1.86535	0.0001994
FBgn0027657	glob1	14.7358	53.4729	1.85948	0.0001994
FBgn0262508	CG43078	1.99799	7.23487	1.85641	0.0001994
FBgn0038071	Dtg	34.1798	123.754	1.85626	0.0001994
FBgn0025712	CG13920	25.0253	90.549	1.85531	0.0001994
FBgn0034128	CG4409	6.75002	24.3858	1.85308	0.0001994
FBgn0263986	cd	56.2525	200.338	1.83245	0.0001994
FBgn0031001	CG7884	2.57574	9.16943	1.83184	0.0001994
FBgn0266801	CG45263	18.3768	65.3923	1.83123	0.0001994
FBgn0052553	CR32553	1.34221	4.77541	1.83102	0.0001994
FBgn0053147	Hs3st-A	1.85329	6.58432	1.82894	0.0001994
FBgn0004623	Gbeta76C	39.2299	137.903	1.81363	0.0001994
FBgn0031725	DIP-eta	1.67505	5.87492	1.81037	0.0001994
FBgn0266417	ringer	63.4571	222.509	1.81001	0.0001994
FBgn0034897	Sesn	26.5794	93.0954	1.8084	0.0001994
FBgn0029814	CG15765	5.20567	18.2192	1.80731	0.0001994
FBgn0041629	Hexo2	10.1179	35.3915	1.80649	0.0001994
FBgn0052183	Ccn	5.00057	17.4179	1.8004	0.0001994
FBgn0030634	CG9164	0.85342	2.97069	1.79947	0.0001994
FBgn0004629	Cys	134.65	467.476	1.79568	0.0001994
FBgn0036501	CG7272	9.9589	34.411	1.78881	0.0001994
FBgn0261552	ps	9.28872	32.0936	1.78873	0.0001994
FBgn0037326	CG14669	4.21148	14.5341	1.78705	0.0001994
FBgn0264598	PsGEF	11.5466	39.6869	1.78119	0.0001994
FBgn0001225	Hsp26	397.553	1365.54	1.78025	0.0001994
FBgn0031424	VGlut	8.67004	29.7793	1.7802	0.0001994
FBgn0036144	GlcAT-P	5.33196	18.3069	1.77965	0.0001994
FBgn0030158	CG9686	28.7874	98.7441	1.77826	0.0001994
FBgn0043841	vir-1	27.0965	92.4695	1.77087	0.0001994
FBgn0024732	Drep1	11.5195	39.275	1.76953	0.0001994
FBgn0033192	Corin	0.595215	2.02253	1.76468	0.0001994
FBgn0010039	GstD3	60.7434	205.868	1.76092	0.0001994
FBgn0028644	beat-Ic	1.00372	3.39626	1.75859	0.0001994
FBgn0261258	rgn	7.6304	25.7944	1.75723	0.0001994
FBgn0037406	Osi1	72.3402	244.274	1.75563	0.0001994
FBgn0052241	CG32241	0.975668	3.28877	1.75309	0.0001994
FBgn0030163	CG1791	1.25141	4.21489	1.75195	0.0001994
FBgn0054034	CG34034	3.42933	11.5389	1.75051	0.0001994
FBgn0022710	Ac13E	0.947499	3.18637	1.74972	0.0001994
FBgn0034157	resilin	15.1132	50.3506	1.7362	0.0001994
FBgn0035505	Teh2	27.0403	90.0302	1.7353	0.0001994
FBgn0034956	CG4324	8.00337	26.6011	1.7328	0.0001994
FBgn0040505	Alk	7.21937	23.9633	1.73088	0.0001994
FBgn0001145	Gs2	3.43561	11.3852	1.72852	0.0001994
FBgn0261929	5-HT2B	0.389031	1.28843	1.72766	0.0001994
FBgn0020294	ko	24.2388	80.0753	1.72404	0.0001994
FBgn0037838	CG4089	8.85781	29.2487	1.72335	0.0001994
FBgn0027580	PCB	8.2514	27.2158	1.72173	0.0001994
FBgn0035431	CG14968	3.18279	10.4966	1.72156	0.0001994
FBgn0020269	mspo	15.974	52.6221	1.71995	0.0001994
FBgn0031275	GABA-B-R3	5.65206	18.513	1.71169	0.0001994
FBgn0031220	CG4822	18.0947	59.2666	1.71165	0.0001994
FBgn0260005	wtrw	2.53588	8.30004	1.71063	0.0001994
FBgn0010350	CdsA	36.9296	120.423	1.70526	0.0001994
FBgn0031914	CG5973	2.77288	9.02921	1.70322	0.0001994
FBgn0035203	CG9149	19.1022	62.0945	1.70073	0.0001994
FBgn0001991	Ca-alpha1D	0.695824	2.26032	1.69973	0.0001994
FBgn0261649	tinc	15.5667	50.5045	1.69795	0.0001994
FBgn0010470	Fkbp14	49.8692	161.421	1.69461	0.0001994
FBgn0031375	erm	9.51475	30.6864	1.68936	0.0001994
FBgn0038603	PKD	35.5573	114.628	1.68874	0.0001994
FBgn0259242	CG42340	2.95732	9.52368	1.68723	0.0001994
FBgn0037690	Task7	7.6254	24.5029	1.68407	0.0001994
FBgn0034567	CG15651	2.42806	7.77751	1.67951	0.0001994
FBgn0034136	DAT	1.54742	4.94608	1.67642	0.0001994
FBgn0036369	CG10089	2.98277	9.47556	1.66756	0.0001994
FBgn0038290	CG6912	40.8336	129.262	1.66247	0.0001994
FBgn0037911	CG10898	8.19363	25.9123	1.66106	0.0001994
FBgn0004575	Syn	22.4166	70.851	1.66022	0.0001994
FBgn0003016	osp	16.3771	51.2275	1.64524	0.0001994
FBgn0040607	CG14244	16.4775	51.5403	1.6452	0.0001994
FBgn0014073	Tie	2.53039	7.91431	1.6451	0.0001994
FBgn0014469	Cyp4e2	2.0911	6.53692	1.64435	0.0001994
FBgn0036152	CG6175	2.2606	7.05634	1.64221	0.0001994
FBgn0033292	Cyp4ad1	1.41424	4.37637	1.6297	0.0001994
FBgn0011584	Trp1	66.3473	205.236	1.62917	0.0001994
FBgn0000964	tj	3.62404	11.2083	1.62889	0.0001994
FBgn0053056	CG33056	7.7575	23.9247	1.62484	0.0001994
FBgn0267336	Glut4EF	5.17004	15.9402	1.62442	0.0001994
FBgn0032013	Scgalpha	28.1148	86.5744	1.62261	0.0001994
FBgn0038243	CG8066	3.79171	11.6677	1.6216	0.0001994
FBgn0030159	CG9689	122.967	377.92	1.61981	0.0001994
FBgn0027356	Amph	21.6198	66.104	1.61238	0.0001994
FBgn0053202	dpr11	13.1491	40.106	1.60885	0.0001994
FBgn0036544	sff	15.1332	46.122	1.60774	0.0001994
FBgn0020307	dve	15.0231	45.7458	1.60645	0.0001994
FBgn0035540	Syx17	10.6188	32.2994	1.60488	0.0001994
FBgn0053203	CG33203	3.7512	11.3869	1.60195	0.0001994
FBgn0285963	CG46339	16.1211	48.8521	1.59947	0.0001994
FBgn0029866	CG3842	25.3996	76.7807	1.59594	0.0001994
FBgn0031294	IA-2	1.64116	4.95125	1.59307	0.0001994
FBgn0262473	Tl	65.5603	197.741	1.59272	0.0001994
FBgn0003292	rt	9.27675	27.9662	1.59199	0.0001994
FBgn0260995	dpr21	12.2619	36.9185	1.59016	0.0001994
FBgn0033259	CG11210	22.8168	68.3534	1.58292	0.0001994
FBgn0030052	CG12065	15.4308	46.2043	1.58222	0.0001994
FBgn0016650	Lgr1	2.00504	5.98736	1.57829	0.0001994
FBgn0030396	CG2556	28.2376	84.2766	1.57751	0.0001994
FBgn0265416	Neto	1.01993	3.02712	1.56948	0.0001994
FBgn0004507	GlyP	13.7295	40.7412	1.56921	0.0001994
FBgn0033793	CG3955	19.4214	57.4751	1.56529	0.0001994
FBgn0025391	Scgdelta	1.88317	5.55892	1.56164	0.0001994
FBgn0030926	psh	4.69392	13.8175	1.55763	0.0001994
FBgn0033079	Fmo-2	1.44693	4.24923	1.55421	0.0001994
FBgn0004885	tok	17.594	51.3203	1.54444	0.0001994
FBgn0004870	bab1	0.91709	2.67374	1.54372	0.0001994
FBgn0003091	Pkc53E	3.83145	11.1404	1.53984	0.0001994
FBgn0267793	CR45232	0.369351	1.07389	1.53978	0.0001994
FBgn0034387	Cyp12b2	1.76094	5.08931	1.53112	0.0001994
FBgn0260745	mfas	187.758	542.315	1.53025	0.0001994
FBgn0267160	CR45600	38.6675	111.385	1.52636	0.0001994
FBgn0033799	GLaz	17.7707	51.1853	1.52623	0.0001994
FBgn0040382	CG5273	30.4207	87.3921	1.52245	0.0001994
FBgn0000529	bsh	5.49009	15.7703	1.52231	0.0001994
FBgn0035942	ValRS-m	35.9967	103.105	1.51817	0.0001994
FBgn0263456	nwk	16.2654	46.5675	1.51752	0.0001994
FBgn0040697	Teh3	11.6749	33.373	1.51528	0.0001994
FBgn0011829	Ret	1.08268	3.09082	1.51338	0.0001994
FBgn0031948	CG7149	4.60426	13.1213	1.51087	0.0001994
FBgn0037468	CG1943	322.478	918.521	1.51011	0.0001994
FBgn0035056	spz6	130.881	371.395	1.5047	0.0001994
FBgn0052485	CG32485	4.29307	12.17	1.50325	0.0001994
FBgn0004168	5-HT1A	1.01332	2.8666	1.50025	0.0001994
FBgn0020503	CLIP-190	14.3222	40.4042	1.49625	0.0001994
FBgn0083949	CG34113	3.86934	10.8986	1.49398	0.0001994
FBgn0086604	CG12484	2.89504	8.15134	1.49345	0.0001994
FBgn0030407	CG2543	4.82762	13.5281	1.48658	0.0001994
FBgn0261859	CG42788	16.4735	46.1226	1.48533	0.0001994
FBgn0038662	Mpc1	7.45575	20.7061	1.47363	0.0001994
FBgn0052666	Drak	23.1402	64.1357	1.47072	0.0001994
FBgn0268063	ltl	13.3771	37.0669	1.47037	0.0001994
FBgn0033134	Tsp42El	63.6569	176.363	1.47016	0.0001994
FBgn0267252	Ggamma30A	99.4548	275.232	1.46854	0.0001994
FBgn0261458	capt	220.61	610.132	1.46763	0.0001994
FBgn0026190	PH4alphaMP	2.05217	5.67047	1.46632	0.0001994
FBgn0030467	CG1764	10.5125	28.9872	1.46331	0.0001994
FBgn0032587	CG5953	3.51727	9.67647	1.46002	0.0001994
FBgn0036725	CG18265	0.915826	2.51654	1.45829	0.0001994
FBgn0000244	by	8.95462	24.5551	1.45532	0.0001994
FBgn0034490	CG9864	1.48184	4.06254	1.455	0.0001994
FBgn0003089	pip	86.2838	235.184	1.44663	0.0001994
FBgn0053144	CG33144	21.718	59.1253	1.44488	0.0001994
FBgn0038818	Nep4	8.53686	23.2262	1.44398	0.0001994
FBgn0030638	CG11655	5.14875	13.9793	1.441	0.0001994
FBgn0260746	Ect3	10.8412	29.4334	1.44093	0.0001994
FBgn0265959	rdgC	42.4789	115.027	1.43716	0.0001994
FBgn0011288	Snap25	18.9905	51.2364	1.43189	0.0001994
FBgn0260446	GABA-B-R1	3.39736	9.16604	1.43189	0.0001994
FBgn0000567	Eip74EF	44.0716	118.772	1.43027	0.0001994
FBgn0032946	nrv3	100.193	269.858	1.42942	0.0001994
FBgn0002868	MtnA	91.5445	246.492	1.429	0.0001994
FBgn0038716	CG7342	1.8639	5.01682	1.42845	0.0001994
FBgn0262475	bru2	3.19183	8.5466	1.42097	0.0001994
FBgn0028494	CG6424	40.321	107.585	1.41588	0.0001994
FBgn0053512	dpr4	4.47664	11.9349	1.41469	0.0001994
FBgn0039854	CG1635	7.48177	19.9356	1.41389	0.0001994
FBgn0037203	slif	0.825876	2.19899	1.41285	0.0001994
FBgn0035142	Hipk	38.0224	101.149	1.41156	0.0001994
FBgn0030997	CG7990	6.35432	16.865	1.40823	0.0001994
FBgn0031489	CG17224	13.4977	35.8119	1.40772	0.0001994
FBgn0263773	fok	38.1725	101.196	1.40654	0.0001994
FBgn0264574	Glut1	34.2182	90.6061	1.40485	0.0001994
FBgn0044823	Spec2	14.0059	37.0076	1.40179	0.0001994
FBgn0259481	Mob2	26.903	71.0487	1.40104	0.0001994
FBgn0038980	Octbeta1R	4.41967	11.6464	1.39787	0.0001994
FBgn0053558	mim	43.36	113.97	1.39422	0.0001994
FBgn0037138	P5CDh1	57.809	151.899	1.39374	0.0001994
FBgn0036240	CG6928	8.2541	21.6616	1.39196	0.0001994
FBgn0004047	Yp3	2.55757	6.71186	1.39194	0.0001994
FBgn0010786	l(3)02640	16.4481	43.0786	1.38905	0.0001994
FBgn0039862	kek6	22.5958	59.16	1.38856	0.0001994
FBgn0037766	Teh1	8.86671	23.1996	1.38763	0.0001994
FBgn0013276	Hsp70Ab	26.7218	69.911	1.3875	0.0001994
FBgn0263316	Mrp4	2.37642	6.20682	1.38506	0.0001994
FBgn0030559	CG13404	16.3996	42.8033	1.38406	0.0001994
FBgn0013275	Hsp70Aa	25.9383	67.6568	1.38315	0.0001994
FBgn0038641	CG7708	1.7615	4.5855	1.38027	0.0001994
FBgn0035755	CG14830	6.44894	16.7302	1.37532	0.0001994
FBgn0030706	Lrp4	3.72909	9.66051	1.37328	0.0001994
FBgn0004055	uzip	45.5533	117.973	1.37283	0.0001994
FBgn0086704	stops	15.0516	38.9651	1.37226	0.0001994
FBgn0028394	CG17834	4.12746	10.6825	1.37193	0.0001994
FBgn0034720	Liprin-gamma	15.1976	39.2735	1.36971	0.0001994
FBgn0032857	CG10947	2.9713	7.67352	1.36879	0.0001994
FBgn0051235	CG31235	3.40745	8.76619	1.36326	0.0001994
FBgn0016013	Faa	8.60683	22.0735	1.35876	0.0001994
FBgn0267339	p38c	2.77179	7.08255	1.35345	0.0001994
FBgn0030432	CG4404	4.4398	11.3125	1.34935	0.0001994
FBgn0000667	Actn	39.3768	99.9355	1.34365	0.0001994
FBgn0259163	CG42268	69.7353	176.383	1.33875	0.0001994
FBgn0028540	CG9008	3.35142	8.46263	1.33633	0.0001994
FBgn0264442	ab	13.124	33.1124	1.33516	0.0001994
FBgn0038053	CG18549	21.1342	53.2929	1.33437	0.0001994
FBgn0036196	CG11658	8.97927	22.6017	1.33176	0.0001994
FBgn0267486	Ptp36E	2.26495	5.69762	1.33088	0.0001994
FBgn0013277	Hsp70Ba	14.9233	37.4932	1.32906	0.0001994
FBgn0000114	bru1	12.713	31.9335	1.32877	0.0001994
FBgn0261704	CG42740	4.63997	11.6536	1.32859	0.0001994
FBgn0035989	CG3967	18.9981	47.6931	1.32793	0.0001994
FBgn0266100	CG44837	5.4879	13.7736	1.32758	0.0001994
FBgn0031299	CG4629	9.32459	23.3482	1.3242	0.0001994
FBgn0265140	Meltrin	24.0164	59.9572	1.31991	0.0001994
FBgn0033739	Dyb	42.3817	105.768	1.31939	0.0001994
FBgn0265988	mv	36.9415	92.1788	1.31919	0.0001994
FBgn0033268	Obp44a	1677.08	4184.64	1.31916	0.0001994
FBgn0052278	CG32278	29.8105	74.2516	1.3166	0.0001994
FBgn0027079	ValRS	25.6522	63.8203	1.31493	0.0001994
FBgn0011676	Nos	0.872342	2.16916	1.31417	0.0001994
FBgn0030539	CG1368	10.7688	26.7766	1.31412	0.0001994
FBgn0263705	Myo10A	25.9199	64.382	1.3126	0.0001994
FBgn0266758	Esyt2	8.11059	20.1207	1.3108	0.0001994
FBgn0028408	Drep2	8.21275	20.3732	1.31073	0.0001994
FBgn0037057	CG10512	7.96858	19.759	1.31011	0.0001994
FBgn0259923	Septin 4	31.5615	78.1542	1.30816	0.0001994
FBgn0015577	alpha-Est9	1.05117	2.60052	1.3068	0.0001994
FBgn0266347	nAChRalpha4	12.4353	30.7443	1.30588	0.0001994
FBgn0263219	Dscam4	22.7391	56.1015	1.30286	0.0001994
FBgn0261545	CG42663	27.404	67.5911	1.30245	0.0001994
FBgn0010051	Itp-r83A	10.235	25.2359	1.30197	0.0001994
FBgn0243516	Vrp1	18.0083	44.3929	1.30167	0.0001994
FBgn0031629	Clect27	5.51508	13.5651	1.29845	0.0001994
FBgn0270928	VAChT	6.57496	16.1712	1.29838	0.0001994
FBgn0031488	CG17265	20.2729	49.8465	1.29794	0.0001994
FBgn0085397	Fili	12.4146	30.5081	1.29716	0.0001994
FBgn0053179	beat-IIIb	7.3422	18.0312	1.29621	0.0001994
FBgn0036821	CG3961	68.6401	168.371	1.29452	0.0001994
FBgn0028746	CG18508	7.80975	19.1455	1.29366	0.0001994
FBgn0013278	Hsp70Bb	24.8997	61.0153	1.29305	0.0001994
FBgn0035941	CG13313	5.39381	13.1985	1.29099	0.0001994
FBgn0003218	rdgB	20.6253	50.3586	1.28782	0.0001994
FBgn0050440	CG30440	23.7734	58.0364	1.28761	0.0001994
FBgn0030065	CG12075	6.6073	16.1273	1.28737	0.0001994
FBgn0036819	Dysb	2.03141	4.9473	1.28416	0.0001994
FBgn0032264	Lip4	12.3485	30.0476	1.28291	0.0001994
FBgn0027335	Rip11	25.5175	62.036	1.28162	0.0001994
FBgn0038601	CG18600	7.51754	18.2495	1.27952	0.0001994
FBgn0000568	Eip75B	87.5506	212.521	1.27942	0.0001994
FBgn0013433	beat-Ia	1.80457	4.36233	1.27345	0.0001994
FBgn0036428	Gbs-70E	12.4217	30.024	1.27325	0.0001994
FBgn0039704	neo	68.2355	164.924	1.2732	0.0001994
FBgn0034618	CG9485	1.41303	3.41487	1.27303	0.0001994
FBgn0030183	CG15309	38.463	92.8759	1.27183	0.0001994
FBgn0266181	CRG	15.5071	37.4276	1.27117	0.0001994
FBgn0034396	CG15097	46.4354	112.038	1.27069	0.0001994
FBgn0033973	HPS1	14.4074	34.7116	1.26861	0.0001994
FBgn0259734	Nost	11.6773	28.1088	1.26732	0.0001994
FBgn0037015	cmpy	7.57933	18.2378	1.26679	0.0001994
FBgn0015400	kek2	20.9331	50.3672	1.2667	0.0001994
FBgn0029761	SK	11.9466	28.7429	1.2666	0.0001994
FBgn0053639	CG33639	6.43704	15.4739	1.26536	0.0001994
FBgn0036678	CG11905	128.719	309.005	1.2634	0.0001994
FBgn0037265	spartin	7.90179	18.9611	1.26279	0.0001994
FBgn0004057	Zw	4.68247	11.2314	1.2622	0.0001994
FBgn0000454	Dip-B	67.4578	161.667	1.26097	0.0001994
FBgn0039304	CG10425	9.7629	23.3164	1.25596	0.0001994
FBgn0029838	CG4666	23.7697	56.7408	1.25526	0.0001994
FBgn0025682	scf	41.4052	98.807	1.2548	0.0001994
FBgn0004167	kst	95.2275	226.954	1.25295	0.0001994
FBgn0036058	CG6707	137.409	326.939	1.25054	0.0001994
FBgn0003996	w	136.809	324.719	1.24703	0.0001994
FBgn0010397	LamC	7.22982	17.1588	1.24692	0.0001994
FBgn0264006	dysc	10.6899	25.352	1.24586	0.0001994
FBgn0263994	CG43737	4.15465	9.81389	1.2401	0.0001994
FBgn0051354	Hsp70Bbb	22.0804	52.0325	1.23665	0.0001994
FBgn0031775	CG9150	38.3552	90.3391	1.23593	0.0001994
FBgn0020389	Papss	19.0534	44.7487	1.2318	0.0001994
FBgn0260997	CG42598	3.66959	8.60759	1.22999	0.0001994
FBgn0037902	CG5281	19.2862	45.1235	1.22631	0.0001994
FBgn0053113	Rtnl1	248.214	580.161	1.22487	0.0001994
FBgn0063494	GstE6	9.50386	22.1664	1.22179	0.0001994
FBgn0033911	VGAT	5.36964	12.5089	1.22006	0.0001994
FBgn0051665	wry	5.72305	13.328	1.21961	0.0001994
FBgn0032586	Tpr2	103.189	240.057	1.21809	0.0001994
FBgn0004513	Mdr65	49.2621	114.43	1.21592	0.0001994
FBgn0030343	ATP7	9.96638	23.15	1.21587	0.0001994
FBgn0086674	Tango13	11.3944	26.4566	1.21531	0.0001994
FBgn0032752	CG10702	6.42757	14.9064	1.21358	0.0001994
FBgn0033504	CAP	23.7699	55.0495	1.21159	0.0001994
FBgn0052843	Dh31-R	2.08184	4.81612	1.21001	0.0001994
FBgn0035586	Fitm	6.15248	14.2245	1.20913	0.0001994
FBgn0030237	CG15209	52.6311	121.638	1.20861	0.0001994
FBgn0036890	CG9368	22.7813	52.6258	1.20792	0.0001994
FBgn0032811	CG10268	10.9702	25.338	1.20771	0.0001994
FBgn0010406	RNaseX25	37.7637	87.1174	1.20596	0.0001994
FBgn0022800	Cad96Ca	25.1158	57.9361	1.20587	0.0001994
FBgn0039419	CG12290	1.92573	4.41786	1.19794	0.0001994
FBgn0031170	CG1718	3.47599	7.96632	1.19649	0.0001994
FBgn0017590	klg	31.7913	72.7144	1.19361	0.0001994
FBgn0025878	wrapper	28.4048	64.8464	1.19089	0.0001994
FBgn0033710	CG17739	47.1324	107.453	1.18891	0.0001994
FBgn0261563	wb	22.1285	50.441	1.18869	0.0001994
FBgn0034135	Syn2	6.33868	14.4227	1.18609	0.0001994
FBgn0039089	beat-IV	10.6798	24.2689	1.18423	0.0001994
FBgn0262624	Tmhs	21.3635	48.5372	1.18394	0.0001994
FBgn0034286	dpr13	5.9727	13.5429	1.18109	0.0001994
FBgn0037238	CG1090	103.978	235.625	1.18022	0.0001994
FBgn0030763	CG9782	96.5561	218.584	1.17875	0.0001994
FBgn0023524	CG3078	3.43087	7.75089	1.17579	0.0001994
FBgn0037130	Syn1	19.0997	43.1355	1.17532	0.0001994
FBgn0032339	Wdr59	6.28453	14.1897	1.17497	0.0001994
FBgn0053126	NLaz	22.9007	51.6165	1.17244	0.0001994
FBgn0041585	olf186-F	34.303	77.1333	1.16902	0.0001994
FBgn0004919	gol	25.837	57.9815	1.16615	0.0001994
FBgn0037963	Cad87A	21.6372	48.5108	1.16479	0.0001994
FBgn0027598	cindr	26.4979	59.2894	1.1619	0.0001994
FBgn0041342	Pcyt1	25.0333	55.9862	1.16122	0.0001994
FBgn0265262	Vha68-1	48.2349	107.827	1.16057	0.0001994
FBgn0030174	CG15312	4.85893	10.8449	1.15831	0.0001994
FBgn0034191	CG6984	7.24175	16.1472	1.15687	0.0001994
FBgn0029975	spidey	19.8125	44.1496	1.15599	0.0001994
FBgn0028863	CG4587	26.4827	58.9628	1.15476	0.0001994
FBgn0261041	stj	21.4009	47.6239	1.15401	0.0001994
FBgn0259246	brp	75.7437	168.432	1.15297	0.0001994
FBgn0022238	lolal	103.432	229.71	1.15113	0.0001994
FBgn0030574	CG9413	8.19487	18.1991	1.15108	0.0001994
FBgn0266369	Mtp	25.3868	56.2559	1.14793	0.0001994
FBgn0013813	Dhc98D	1.61126	3.56369	1.14518	0.0001994
FBgn0038975	Nrx-1	27.4075	60.5824	1.14433	0.0001994
FBgn0027835	Dp1	104.691	231.208	1.14306	0.0001994
FBgn0041605	cpx	144.709	319.474	1.14254	0.0001994
FBgn0032485	CG9426	41.7459	92.1408	1.14221	0.0001994
FBgn0266721	gammaSnap2	8.05611	17.781	1.14218	0.0001994
FBgn0013279	Hsp70Bc	21.6187	47.7034	1.14181	0.0001994
FBgn0263873	sick	35.7111	78.4987	1.1363	0.0001994
FBgn0028743	Dhit	7.33562	16.1199	1.13585	0.0001994
FBgn0031888	Pvf2	5.56465	12.225	1.13547	0.0001994
FBgn0002567	Rab32	310.788	682.415	1.13472	0.0001994
FBgn0030351	CG1840	15.1463	33.2017	1.13229	0.0001994
FBgn0038465	Irc	3.28223	7.19383	1.13208	0.0001994
FBgn0036502	CG7841	4.63282	10.1437	1.13063	0.0001994
FBgn0014032	Sptr	17.5356	38.3301	1.12819	0.0001994
FBgn0032079	CG31886	2.03005	4.41426	1.12066	0.0001994
FBgn0036715	Cad74A	14.225	30.8985	1.11911	0.0001994
FBgn0038195	CG3061	27.1047	58.8464	1.11841	0.0001994
FBgn0050419	CG30419	7.69041	16.6491	1.11431	0.0001994
FBgn0037896	ninaG	18.2531	39.4995	1.11369	0.0001994
FBgn0025743	mbt	58.4538	126.342	1.11196	0.0001994
FBgn0042696	NfI	25.8442	55.8372	1.11138	0.0001994
FBgn0002543	robo2	9.01061	19.4042	1.10667	0.0001994
FBgn0259700	CG42354	30.0794	64.7327	1.10572	0.0001994
FBgn0266525	CG45092	6.34401	13.6495	1.10538	0.0001994
FBgn0031544	CG17593	22.974	49.4095	1.10479	0.0001994
FBgn0264711	CG43980	8.3564	17.9582	1.10369	0.0001994
FBgn0015622	Cnx99A	121.684	261.042	1.10114	0.0001994
FBgn0010105	comm	13.3427	28.6162	1.10078	0.0001994
FBgn0050069	CG30069	2.12987	4.56576	1.10009	0.0001994
FBgn0033250	CG14762	27.1581	58.1858	1.09928	0.0001994
FBgn0037290	CG1124	12.1562	26.0206	1.09796	0.0001994
FBgn0015774	NetB	28.0596	60.0219	1.097	0.0001994
FBgn0261873	sdt	51.5315	110.194	1.09653	0.0001994
FBgn0031850	Tsp	12.0693	25.7386	1.09259	0.0001994
FBgn0034894	sigmar	26.1721	55.7907	1.09199	0.0001994
FBgn0041087	wun2	13.3	28.3512	1.09199	0.0001994
FBgn0030683	CG8239	15.257	32.496	1.09079	0.0001994
FBgn0083967	Muted	13.5717	28.8811	1.08952	0.0001994
FBgn0250732	gfzf	14.4071	30.5509	1.08443	0.0001994
FBgn0003435	sm	23.2412	49.2472	1.08335	0.0001994
FBgn0001098	Gdh	48.6889	103.037	1.0815	0.0001994
FBgn0000064	Ald	145.177	306.734	1.07918	0.0001994
FBgn0261794	kcc	17.0003	35.837	1.07589	0.0001994
FBgn0036481	CG16959	9.5058	20.0144	1.07416	0.0001994
FBgn0036494	Toll-6	1.82534	3.82656	1.06789	0.0001994
FBgn0037126	CG14567	18.7113	39.2027	1.06704	0.0001994
FBgn0003890	betaTub97EF	28.0491	58.7642	1.06698	0.0001994
FBgn0030925	Hayan	5.50455	11.5184	1.06525	0.0001994
FBgn0037341	CG12746	13.0992	27.3544	1.0623	0.0001994
FBgn0016975	stnB	27.3681	57.1436	1.0621	0.0001994
FBgn0035521	VhaM9.7-a	52.5752	109.77	1.06203	0.0001994
FBgn0014869	Pglym78	26.9132	56.1883	1.06195	0.0001994
FBgn0031990	PAPLA1	17.3437	36.2043	1.06175	0.0001994
FBgn0034142	CG8306	42.647	88.9164	1.06001	0.0001994
FBgn0261588	pdm3	7.50927	15.6473	1.05917	0.0001994
FBgn0034997	CG3376	10.8835	22.662	1.05814	0.0001994
FBgn0029837	Tsp5D	21.3674	44.4471	1.05668	0.0001994
FBgn0264542	hwt	10.5886	22.013	1.05584	0.0001994
FBgn0031049	Sec61gamma	102.566	213.146	1.05529	0.0001994
FBgn0030729	CG12507	7.31066	15.1364	1.04995	0.0001994
FBgn0052499	Cda4	14.4736	29.9349	1.0484	0.0001994
FBgn0036485	FucTA	4.98985	10.3191	1.04824	0.0001994
FBgn0004363	porin	358.639	741.483	1.04788	0.0001994
FBgn0033482	CG1371	28.3161	58.461	1.04585	0.0001994
FBgn0051660	smog	4.12793	8.51926	1.04531	0.0001994
FBgn0259822	Ca-beta	71.221	146.915	1.04461	0.0001994
FBgn0086913	Rab26	4.04615	8.34011	1.04352	0.0001994
FBgn0250791	alphaSnap	65.2633	134.39	1.04208	0.0001994
FBgn0005659	Ets98B	11.4963	23.6476	1.04052	0.0001994
FBgn0085443	spri	47.0845	96.6468	1.03747	0.0001994
FBgn0285879	disco-r	3.07421	6.30783	1.03693	0.0001994
FBgn0010473	tutl	82.7068	169.526	1.03543	0.0001994
FBgn0041160	comm2	8.4779	17.3696	1.03479	0.0001994
FBgn0051324	CG31324	11.1908	22.9226	1.03446	0.0001994
FBgn0069969	CG40498	38.0318	77.8618	1.03371	0.0001994
FBgn0003463	sog	9.8732	20.2077	1.03332	0.0001994
FBgn0032484	kek4	11.1372	22.7946	1.0333	0.0001994
FBgn0004387	Klp98A	10.8446	22.1781	1.03217	0.0001994
FBgn0263780	CG17684	8.06032	16.4821	1.03199	0.0001994
FBgn0029801	CG15771	7.44812	15.1948	1.02863	0.0001994
FBgn0035676	ssp6	8.43743	17.1861	1.02637	0.0001994
FBgn0029856	CG11700	8.09931	16.4917	1.02587	0.0001994
FBgn0086708	stv	30.379	61.7302	1.0229	0.0001994
FBgn0261955	kdn	44.8571	90.9821	1.02024	0.0001994
FBgn0003891	tud	94.8528	192.153	1.01849	0.0001994
FBgn0261285	Ppcs	6.12489	12.4042	1.01808	0.0001994
FBgn0033159	Dscam1	26.7645	54.0446	1.01383	0.0001994
FBgn0035936	Tsp66E	122.91	247.883	1.01206	0.0001994
FBgn0051690	CG31690	29.045	58.5706	1.01189	0.0001994
FBgn0037060	CG10508	13.9375	28.0878	1.01097	0.0001994
FBgn0261625	GLS	2.7467	5.52454	1.00815	0.0001994
FBgn0011661	Moe	165.137	332.065	1.0078	0.0001994
FBgn0004611	Plc21C	12.2435	24.618	1.0077	0.0001994
FBgn0051676	CG31676	119.51	239.864	1.00508	0.0001994
FBgn0028468	rtet	29.8036	59.7969	1.00459	0.0001994
FBgn0267912	CanA-14F	17.949	35.9983	1.00402	0.0001994
FBgn0030452	MFS10	19.3758	38.8479	1.00358	0.0001994
FBgn0030090	fend	2.32014	4.64983	1.00297	0.0001994
FBgn0052529	Hers	18.4553	36.9529	1.00165	0.0001994
FBgn0037734	trbd	15.4518	30.9267	1.00108	0.0001994
FBgn0035880	Culd	46.6391	93.2532	0.999613	0.0001994
FBgn0039723	CG15522	169.805	339.516	0.999598	0.0001994
FBgn0036770	Prestin	3.14444	6.27448	0.996692	0.0001994
FBgn0020647	KrT95D	21.8853	43.6532	0.996123	0.0001994
FBgn0037009	CG5104	30.9768	61.5438	0.990426	0.0001994
FBgn0000253	Cam	459.403	911.765	0.988901	0.0001994
FBgn0035481	CG12605	26.377	52.2937	0.987356	0.0001994
FBgn0052451	SPoCk	42.5426	84.2265	0.985368	0.0001994
FBgn0015776	nrv1	68.4445	135.439	0.984634	0.0001994
FBgn0031636	CG12194	7.2728	14.3825	0.983731	0.0001994
FBgn0050203	CG30203	4.30021	8.49224	0.981738	0.0001994
FBgn0265487	mbl	114.411	225.867	0.981239	0.0001994
FBgn0083963	Nlg3	6.0983	11.9998	0.97653	0.0001994
FBgn0267376	SelR	109.042	214.484	0.975991	0.0001994
FBgn0052600	dpr8	19.7293	38.7887	0.975297	0.0001994
FBgn0036579	CG5027	28.2594	55.4758	0.973131	0.0001994
FBgn0035625	Blimp-1	38.5986	75.7518	0.972732	0.0001994
FBgn0003068	per	2.40953	4.71873	0.969648	0.0001994
FBgn0053094	Synd	60.6061	118.661	0.969313	0.0001994
FBgn0027660	blot	89.2134	174.557	0.968365	0.0001994
FBgn0000633	CG17716	8.9317	17.475	0.968288	0.0001994
FBgn0003748	Treh	23.5214	46.0177	0.968218	0.0001994
FBgn0039155	Kal1	30.5869	59.7045	0.964926	0.0001994
FBgn0032886	CG9328	23.8002	46.3647	0.962055	0.0001994
FBgn0036007	path	25.9124	50.4523	0.961278	0.0001994
FBgn0010014	CanB	57.8259	112.559	0.960893	0.0001994
FBgn0261260	mgl	19.0035	36.95	0.959309	0.0001994
FBgn0031879	uif	41.2446	80.1855	0.959138	0.0001994
FBgn0052544	CG32544	16.4321	31.8536	0.95494	0.0001994
FBgn0036837	CG18135	5.87558	11.383	0.954081	0.0001994
FBgn0036882	CG9279	7.60748	14.7018	0.950499	0.0001994
FBgn0259227	CG42327	9.11186	17.6021	0.94993	0.0001994
FBgn0051721	Trim9	12.3142	23.7754	0.949143	0.0001994
FBgn0035495	CG14989	7.41417	14.3073	0.948397	0.0001994
FBgn0033961	ND-B15	53.8398	103.882	0.948198	0.0001994
FBgn0062413	Ctr1A	22.2092	42.7608	0.945132	0.0001994
FBgn0038755	Hs6st	31.6791	60.9468	0.944017	0.0001994
FBgn0037487	thw	6.25171	12.0191	0.943006	0.0001994
FBgn0264707	RhoGEF3	36.2698	69.7213	0.942829	0.0001994
FBgn0027095	Manf	125.737	241.682	0.942705	0.0001994
FBgn0028509	CenG1A	34.8195	66.8824	0.941731	0.0001994
FBgn0050463	CG30463	58.4644	111.961	0.937371	0.0001994
FBgn0004882	orb	2.33944	4.47929	0.937107	0.0001994
FBgn0033785	Sans	13.6289	26.09	0.936827	0.0001994
FBgn0259707	CG42361	17.7638	33.9999	0.936591	0.0001994
FBgn0036380	CG8757	9.63716	18.43	0.935374	0.0001994
FBgn0085400	CG34371	23.7734	45.3945	0.93317	0.0001994
FBgn0267828	Fatp	95.259	181.583	0.930702	0.0001994
FBgn0031681	pgant5	35.5513	67.652	0.928228	0.0001994
FBgn0004619	GluRIA	3.6564	6.95626	0.927889	0.0001994
FBgn0032681	CG10283	19.9468	37.9291	0.927147	0.0001994
FBgn0038237	Pde6	3.30206	6.27866	0.92709	0.0001994
FBgn0030077	CG15365	3.93505	7.4745	0.925593	0.0001994
FBgn0250869	CG42240	14.9423	28.3591	0.924415	0.0001994
FBgn0243513	cnir	31.5278	59.7243	0.921691	0.0001994
FBgn0004449	Ten-m	26.3566	49.9023	0.920939	0.0001994
FBgn0085612	CR41320	28.72	54.3596	0.920478	0.0001994
FBgn0261049	Vps45	10.6659	20.1643	0.918804	0.0001994
FBgn0035499	Chd64	207.678	392.469	0.918229	0.0001994
FBgn0036927	Gabat	34.2492	64.6945	0.917573	0.0001994
FBgn0031811	CG13982	31.9199	60.2135	0.915631	0.0001994
FBgn0004784	inaC	101.774	191.868	0.914744	0.0001994
FBgn0030030	CG1636	21.0412	39.607	0.912538	0.0001994
FBgn0039296	CG10420	8.19927	15.4335	0.912498	0.0001994
FBgn0037552	CG7800	5.14409	9.67042	0.910663	0.0001994
FBgn0033357	Tom7	182.243	342.335	0.909542	0.0001994
FBgn0263911	COX8	178.09	334.27	0.908413	0.0001994
FBgn0260941	app	35.3918	66.4191	0.908182	0.0001994
FBgn0019985	mGluR	2.75258	5.16098	0.906861	0.0001994
FBgn0053978	CG33978	89.521	167.648	0.905137	0.0001994
FBgn0085450	Snoo	16.5855	31.0364	0.904043	0.0001994
FBgn0038816	Lrrk	15.2572	28.5371	0.903347	0.0001994
FBgn0030038	CG1440	75.5081	141.226	0.903307	0.0001994
FBgn0044028	Notum	2.74893	5.14055	0.903055	0.0001994
FBgn0039816	CG11317	6.3431	11.858	0.9026	0.0001994
FBgn0043070	MESK2	94.1742	175.901	0.901361	0.0001994
FBgn0039637	Ctl2	31.3723	58.5787	0.900884	0.0001994
FBgn0032001	CG8360	17.0799	31.8561	0.899272	0.0001994
FBgn0086445	l(2)37Cd	5.89741	10.9939	0.898548	0.0001994
FBgn0047135	CG32276	247.083	460.494	0.898187	0.0001994
FBgn0003719	tld	2.49069	4.63999	0.897579	0.0001994
FBgn0026059	Mhcl	51.6593	96.1986	0.896987	0.0001994
FBgn0036773	CG13698	39.2119	72.9559	0.895734	0.0001994
FBgn0027602	CG8611	7.62169	14.1555	0.893178	0.0001994
FBgn0039487	gb	34.3867	63.8202	0.892162	0.0001994
FBgn0085421	Epac	127.374	236.158	0.890684	0.0001994
FBgn0036341	Syx13	82.7327	153.364	0.890434	0.0001994
FBgn0030411	CG2540	7.84395	14.5405	0.890427	0.0001994
FBgn0028327	l(1)G0320	232.712	430.626	0.887889	0.0001994
FBgn0004509	Fur1	21.7244	40.1895	0.887501	0.0001994
FBgn0028341	Ptpmeg2	44.6398	82.5601	0.887114	0.0001994
FBgn0039043	CG17121	26.6417	49.2578	0.886668	0.0001994
FBgn0086778	nAChRalpha7	231.8	428.555	0.886599	0.0001994
FBgn0020385	pug	11.4022	21.0586	0.885095	0.0001994
FBgn0041604	dlp	57.6167	106.374	0.884586	0.0001994
FBgn0259979	CG17337	40.0626	73.9279	0.883864	0.0001994
FBgn0004003	wbl	21.3182	39.2442	0.880397	0.0001994
FBgn0035771	Sec63	58.5997	107.8	0.879391	0.0001994
FBgn0004396	CrebA	17.0956	31.4256	0.878318	0.0001994
FBgn0036934	sNPF-R	3.27574	6.01918	0.877747	0.0001994
FBgn0010434	cora	89.9859	165.182	0.876282	0.0001994
FBgn0028370	kek3	23.6965	43.4786	0.875632	0.0001994
FBgn0005640	Eip63E	45.2932	83.0222	0.874201	0.0001994
FBgn0262559	Mdh2	96.0908	176.094	0.873874	0.0001994
FBgn0039617	DIP-gamma	2.61214	4.77959	0.871654	0.0001994
FBgn0036764	CG5535	9.87168	18.0419	0.869981	0.0001994
FBgn0039006	Cyp6d4	34.4417	62.9145	0.869235	0.0001994
FBgn0053547	Rim	34.6418	63.2446	0.868429	0.0001994
FBgn0033652	ths	25.7431	46.9581	0.867188	0.0001994
FBgn0028523	CG5888	29.2388	53.3275	0.866995	0.0001994
FBgn0264001	bru3	14.4386	26.323	0.866387	0.0001994
FBgn0029175	Ext2	19.3336	35.2315	0.865758	0.0001994
FBgn0034501	CG13868	27.984	50.819	0.860765	0.0001994
FBgn0032249	TBC1D16	13.8272	25.0933	0.859797	0.0001994
FBgn0013342	nSyb	91.7328	166.434	0.85944	0.0001994
FBgn0265767	zyd	9.14183	16.5848	0.859306	0.0001994
FBgn0264272	mwh	32.1341	58.27	0.858645	0.0001994
FBgn0026438	Eaat2	19.5476	35.4374	0.858283	0.0001994
FBgn0262476	CG43066	3.78316	6.8563	0.857839	0.0001994
FBgn0032482	Pect	27.6937	50.1612	0.857015	0.0001994
FBgn0283531	Duox	9.99891	18.1034	0.856417	0.0001994
FBgn0005564	Shal	7.74197	14.0157	0.856272	0.0001994
FBgn0022382	Pka-R2	16.2449	29.3935	0.855515	0.0001994
FBgn0259239	CG42337	18.3527	33.2004	0.855209	0.0001994
FBgn0066101	LpR1	4.34905	7.86572	0.854878	0.0001994
FBgn0031897	CG13784	13.6601	24.6662	0.852572	0.0001994
FBgn0034920	CG5597	30.1322	54.3826	0.851839	0.0001994
FBgn0010389	htl	6.62928	11.9607	0.851376	0.0001994
FBgn0026189	prominin-like	148.229	267.232	0.850266	0.0001994
FBgn0029824	CG3726	8.40099	15.1379	0.849529	0.0001994
FBgn0015371	chn	63.5577	114.382	0.84772	0.0001994
FBgn0036887	CG9231	20.2518	36.4441	0.847634	0.0001994
FBgn0001218	Hsc70-3	360.467	647.657	0.845361	0.0001994
FBgn0039944	CG17162	31.9051	57.3106	0.845015	0.0001994
FBgn0027865	Tsp96F	41.6318	74.7606	0.844592	0.0001994
FBgn0032172	CG5850	29.0929	52.217	0.843851	0.0001994
FBgn0001138	grn	8.39379	15.057	0.843036	0.0001994
FBgn0024957	Irp-1B	41.9369	75.1835	0.842195	0.0001994
FBgn0004646	ogre	162.685	291.594	0.841882	0.0001994
FBgn0003187	qua	45.8312	82.1301	0.841582	0.0001994
FBgn0033919	CG8547	17.4396	31.1912	0.838775	0.0001994
FBgn0025697	santa-maria	11.3758	20.3061	0.83594	0.0001994
FBgn0038659	EndoA	52.3813	93.4436	0.835045	0.0001994
FBgn0032699	CG10383	5.33053	9.49692	0.833181	0.0001994
FBgn0000711	flw	39.7849	70.832	0.832181	0.0001994
FBgn0050497	CG30497	21.7389	38.6804	0.831322	0.0001994
FBgn0029092	ced-6	31.6167	56.2527	0.831235	0.0001994
FBgn0015614	CanB2	58.4359	103.92	0.83055	0.0001994
FBgn0027581	CG6191	24.4706	43.4547	0.828462	0.0001994
FBgn0261985	Ptpmeg	53.3568	94.729	0.828135	0.0001994
FBgn0032135	GlcAT-S	8.87172	15.7434	0.827463	0.0001994
FBgn0002645	Map205	132.598	235.246	0.827118	0.0001994
FBgn0086558	Ubi-p5E	243.385	431.175	0.825034	0.0001994
FBgn0085423	CG34394	28.1465	49.8235	0.823869	0.0001994
FBgn0046114	Gclm	17.7196	31.3461	0.822938	0.0001994
FBgn0034025	GalNAc-T1	11.2352	19.8589	0.821768	0.0001994
FBgn0260795	NaPi-III	31.7305	56.0818	0.821661	0.0001994
FBgn0260499	qvr	29.7939	52.6177	0.82053	0.0001994
FBgn0032618	CG31743	13.2029	23.3121	0.820229	0.0001994
FBgn0035943	CG5653	198.795	350.826	0.819478	0.0001994
FBgn0259834	out	10.9653	19.2857	0.81459	0.0001994
FBgn0034951	CG3860	7.16571	12.5977	0.813976	0.0001994
FBgn0004648	svr	50.4002	88.5882	0.813685	0.0001994
FBgn0036454	CG17839	7.9871	14.0351	0.813292	0.0001994
FBgn0028916	CG33090	8.73869	15.3537	0.813095	0.0001994
FBgn0050344	CG30344	9.93253	17.4353	0.811775	0.0001994
FBgn0038179	CG9312	77.9666	136.654	0.809603	0.0001994
FBgn0026619	Taz	11.114	19.4661	0.80858	0.0001994
FBgn0052441	CG32441	66.729	116.863	0.808428	0.0001994
FBgn0050296	RIC-3	21.8793	38.3022	0.807858	0.0001994
FBgn0011225	jar	78.2117	136.891	0.807567	0.0001994
FBgn0034419	CG15111	49.1735	86.054	0.80736	0.0001994
FBgn0028292	ric8a	11.6341	20.3413	0.80605	0.0001994
FBgn0030245	CG1637	46.7174	81.5959	0.804536	0.0001994
FBgn0000490	dpp	8.78764	15.3391	0.803671	0.0001994
FBgn0039674	CG1907	12.8233	22.3689	0.802729	0.0001994
FBgn0035538	DopEcR	11.0085	19.1883	0.801603	0.0001994
FBgn0038829	CG17271	52.5234	91.4464	0.799966	0.0001994
FBgn0015609	CadN	79.7489	138.734	0.798788	0.0001994
FBgn0263079	CG43338	5.78215	10.0511	0.797681	0.0001994
FBgn0039883	RhoGAP100F	44.0931	76.6283	0.797326	0.0001994
FBgn0032123	Oatp30B	44.106	76.6266	0.796869	0.0001994
FBgn0054038	CG34038	16.1991	28.1236	0.795869	0.0001994
FBgn0032233	dpr19	21.7084	37.6378	0.79393	0.0001994
FBgn0266488	CG45087	14.7799	25.625	0.793913	0.0001994
FBgn0034066	CG8397	44.036	76.3051	0.793095	0.0001994
FBgn0033095	CG3409	6.29889	10.9045	0.791758	0.0001994
FBgn0052057	dpr10	15.939	27.5609	0.790056	0.0001994
FBgn0014391	sun	124.362	214.585	0.787001	0.0001994
FBgn0263220	Hk	4.34418	7.49218	0.7863	0.0001994
FBgn0038360	CG9590	9.27433	15.9917	0.786012	0.0001994
FBgn0029835	CG5921	8.8879	15.324	0.785879	0.0001994
FBgn0030581	CG14408	20.4927	35.2892	0.784116	0.0001994
FBgn0040942	CG12643	131.766	226.748	0.783108	0.0001994
FBgn0000071	Ama	17.4795	30.0732	0.782812	0.0001994
FBgn0052423	shep	153.453	263.833	0.781829	0.0001994
FBgn0285955	cv-c	22.1313	38.0505	0.781828	0.0001994
FBgn0058178	CG40178	66.0073	113.347	0.780053	0.0001994
FBgn0033446	CG1648	41.0051	70.3914	0.779596	0.0001994
FBgn0265048	cv-d	9.48488	16.2599	0.777617	0.0001994
FBgn0015245	Hsp60A	85.9625	147.213	0.776131	0.0001994
FBgn0004242	Syt1	69.611	119.17	0.775632	0.0001994
FBgn0083962	CG34126	21.6589	37.0548	0.774701	0.0001994
FBgn0027590	GstE12	176.379	301.652	0.774208	0.0001994
FBgn0050089	CG30089	12.0192	20.5513	0.773888	0.0001994
FBgn0052407	CG32407	17.3332	29.6092	0.772511	0.0001994
FBgn0030358	CG10362	8.7233	14.8843	0.770845	0.0001994
FBgn0024277	trio	32.8634	55.9284	0.767099	0.0001994
FBgn0052626	AMPdeam	38.9417	66.2479	0.76656	0.0001994
FBgn0259238	CG42336	138.845	235.888	0.764624	0.0001994
FBgn0087011	CG41520	25.7954	43.7482	0.762107	0.0001994
FBgn0030816	CG16700	11.7762	19.9611	0.761314	0.0001994
FBgn0034261	HPS4	18.9998	32.1911	0.760681	0.0001994
FBgn0036846	MESR6	25.1807	42.6618	0.760625	0.0001994
FBgn0265605	Ric	19.059	32.2877	0.760514	0.0001994
FBgn0067864	Patj	23.7324	40.17	0.75926	0.0001994
FBgn0038672	CG6005	11.9786	20.2553	0.757836	0.0001994
FBgn0025702	Srpk79D	24.1816	40.8471	0.756321	0.0001994
FBgn0028862	dao	12.5312	21.1567	0.755586	0.0001994
FBgn0038747	RhoGAP92B	18.4436	31.1138	0.754433	0.0001994
FBgn0025525	bab2	10.6121	17.8932	0.753706	0.0001994
FBgn0034959	CG11388	35.225	59.3764	0.75329	0.0001994
FBgn0028993	scro	47.309	79.7333	0.753067	0.0001994
FBgn0042630	Sox21b	4.59952	7.73395	0.749723	0.0001994
FBgn0030791	CG9132	44.2795	74.3847	0.748366	0.0001994
FBgn0035600	Cyt-c1	51.3708	86.241	0.747426	0.0001994
FBgn0029504	CHES-1-like	7.90531	13.2631	0.746524	0.0001994
FBgn0013343	Syx1A	36.8588	61.791	0.745386	0.0001994
FBgn0040660	CG13551	216.272	362.427	0.744845	0.0001994
FBgn0039135	CG13603	45.0502	75.4794	0.74455	0.0001994
FBgn0030555	Fbxl4	14.7611	24.7269	0.744281	0.0001994
FBgn0040309	Jafrac1	224.615	375.9	0.742897	0.0001994
FBgn0032006	Pvr	4.20492	7.03432	0.742333	0.0001994
FBgn0267978	ap	19.5443	32.6849	0.741879	0.0001994
FBgn0033031	CG8245	19.3762	32.4001	0.741713	0.0001994
FBgn0004380	Klp64D	13.6656	22.8341	0.740638	0.0001994
FBgn0001114	Glt	7.52018	12.5631	0.740353	0.0001994
FBgn0083978	CG17672	87.6927	146.367	0.739066	0.0001994
FBgn0014002	Pdi	497.392	829.901	0.738558	0.0001994
FBgn0052103	CG32103	29.2992	48.8754	0.738246	0.0001994
FBgn0265296	Dscam2	139.081	231.988	0.738122	0.0001994
FBgn0001316	klar	116.879	194.829	0.73719	0.0001994
FBgn0033844	bbc	48.8933	81.4255	0.735845	0.0001994
FBgn0036801	MYPT-75D	9.41514	15.6762	0.73552	0.0001994
FBgn0040918	schlank	41.7099	69.2913	0.732284	0.0001994
FBgn0039537	CG5590	70.0637	116.306	0.731183	0.0001994
FBgn0026147	CG16833	19.1084	31.6957	0.730078	0.0001994
FBgn0000557	eEF1alpha2	490.582	813.029	0.728812	0.0001994
FBgn0263120	Acsl	36.8094	60.9344	0.727184	0.0001994
FBgn0035477	CG14982	7.67901	12.6973	0.725529	0.0001994
FBgn0010352	Nc73EF	29.8342	49.3291	0.725472	0.0001994
FBgn0013770	Cp1	105.236	173.966	0.725179	0.0001994
FBgn0264443	CG43861	20.339	33.5197	0.720764	0.0001994
FBgn0038720	CG6231	4.9896	8.22118	0.720422	0.0001994
FBgn0020762	Atet	23.4451	38.6108	0.719716	0.0001994
FBgn0039528	dsd	42.2835	69.6318	0.719651	0.0001994
FBgn0083950	CG34114	9.02286	14.8482	0.718635	0.0001994
FBgn0036353	CG10171	17.72	29.1538	0.718305	0.0001994
FBgn0039690	CG1969	24.6305	40.5116	0.717885	0.0001994
FBgn0260971	CG42594	6.21059	10.1992	0.715652	0.0001994
FBgn0010638	Sec61beta	222.504	365.253	0.715061	0.0001994
FBgn0000046	Act87E	7.75927	12.7347	0.714776	0.0001994
FBgn0053100	eIF4EHP	37.6911	61.8547	0.714658	0.0001994
FBgn0038535	alt	77.8478	127.638	0.713327	0.0001994
FBgn0035677	CG13293	36.3342	59.524	0.712141	0.0001994
FBgn0030292	CG11752	59.5854	97.4998	0.71044	0.0001994
FBgn0020653	Trxr-1	115.637	189.152	0.709937	0.0001994
FBgn0035574	RhoGEF64C	48.2026	78.8045	0.709168	0.0001994
FBgn0035916	GAPsec	17.228	28.1452	0.708136	0.0001994
FBgn0016693	Past1	35.5872	58.1261	0.707827	0.0001994
FBgn0262737	mub	331.028	540.512	0.707373	0.0001994
FBgn0263934	esn	28.2181	46.0687	0.70717	0.0001994
FBgn0266409	CG45049	60.2731	98.3646	0.706626	0.0001994
FBgn0035148	CG3402	21.0176	34.2917	0.706263	0.0001994
FBgn0037614	TMEM216	14.0159	22.8636	0.705982	0.0001994
FBgn0260484	HIP	90.913	147.851	0.701584	0.0001994
FBgn0051072	Lerp	13.8411	22.488	0.700199	0.0001994
FBgn0029996	UbcE2H	65.8286	106.865	0.699008	0.0001994
FBgn0029959	Rab39	22.729	36.8931	0.698816	0.0001994
FBgn0014135	bnl	3.83501	6.22178	0.6981	0.0001994
FBgn0260855	Sec22	41.1091	66.6637	0.697445	0.0001994
FBgn0004435	Galphaq	150.635	244.126	0.696572	0.0001994
FBgn0039294	Cad96Cb	11.4637	18.5511	0.694431	0.0001994
FBgn0037679	Aduk	13.328	21.5613	0.693987	0.0001994
FBgn0027550	CG6495	26.2873	42.5156	0.693627	0.0001994
FBgn0036286	CG10616	20.7745	33.556	0.691755	0.0001994
FBgn0031150	bves	41.4708	66.9185	0.69031	0.0001994
FBgn0039269	veli	47.6955	76.8644	0.688464	0.0001994
FBgn0001220	Hsc70-5	46.6056	75.0739	0.687809	0.0001994
FBgn0011202	dia	13.88	22.339	0.686554	0.0001994
FBgn0266449	Kr-h2	77.6135	124.846	0.685772	0.0001994
FBgn0034432	CG7461	47.9139	77.0535	0.685416	0.0001994
FBgn0037756	CG8507	29.0645	46.727	0.684998	0.0001994
FBgn0266227	CR44922	140.583	226.005	0.684934	0.0001994
FBgn0003423	slgA	37.3488	60.0074	0.684081	0.0001994
FBgn0028481	CG4341	21.095	33.8709	0.683144	0.0001994
FBgn0285910	VhaAC39-1	48.5772	77.9474	0.682222	0.0001994
FBgn0036697	rogdi	24.903	39.9494	0.681852	0.0001994
FBgn0037063	CG9391	35.2421	56.5189	0.681435	0.0001994
FBgn0032361	CG6488	14.091	22.5892	0.680865	0.0001994
FBgn0259749	mmy	31.7708	50.9172	0.68045	0.0001994
FBgn0050021	metro	18.1655	29.1037	0.680001	0.0001994
FBgn0015772	Nak	29.2363	46.8257	0.679539	0.0001994
FBgn0032901	sky	21.0286	33.6743	0.679298	0.0001994
FBgn0050394	CG30394	14.8336	23.7467	0.67886	0.0001994
FBgn0030613	Rab3-GEF	10.2719	16.4418	0.67867	0.0001994
FBgn0041092	tai	22.4984	36.0113	0.678628	0.0001994
FBgn0052066	CG32066	33.179	53.0972	0.678362	0.0001994
FBgn0030733	UQCR-14	112.593	180.14	0.678	0.0001994
FBgn0261262	CG42613	9.36156	14.9722	0.677468	0.0001994
FBgn0034476	Toll-7	14.6304	23.3971	0.677364	0.0001994
FBgn0267378	sau	59.482	95.0525	0.676272	0.0001994
FBgn0020299	stumps	21.2801	33.9926	0.67572	0.0001994
FBgn0029676	HIP-R	113.557	181.387	0.675662	0.0001994
FBgn0036309	Hip1	15.8288	25.2786	0.675365	0.0001994
FBgn0031882	Rab30	22.1482	35.3648	0.675124	0.0001994
FBgn0028427	Ilk	26.8358	42.7363	0.671303	0.0001994
FBgn0021795	Tapdelta	174.202	277.335	0.670863	0.0001994
FBgn0013681	mt:ND3	288.408	458.547	0.668958	0.0001994
FBgn0260866	dnr1	10.9726	17.4432	0.668762	0.0001994
FBgn0002921	Atpalpha	308.614	490.595	0.668732	0.0001994
FBgn0036318	Wbp2	31.4015	49.8886	0.667876	0.0001994
FBgn0264089	sli	40.9289	64.8851	0.664769	0.0001994
FBgn0034230	CG4853	34.2804	54.3359	0.664522	0.0001994
FBgn0035909	ergic53	74.3307	117.67	0.662722	0.0001994
FBgn0283536	Vha13	75.7498	119.829	0.661666	0.0001994
FBgn0038924	CG6028	30.4739	48.1892	0.661133	0.0001994
FBgn0034345	CG5174	211.841	334.986	0.661119	0.0001994
FBgn0033761	CG8778	22.3959	35.3703	0.659306	0.0001994
FBgn0035995	CG3529	33.1346	52.295	0.658334	0.0001994
FBgn0040793	CG7630	128.241	202.35	0.65799	0.0001994
FBgn0039590	CG10011	28.0117	44.1686	0.656989	0.0001994
FBgn0031971	Sirup	243.872	384.315	0.656165	0.0001994
FBgn0004381	Klp68D	18.6046	29.3177	0.656114	0.0001994
FBgn0035283	CG12024	26.5159	41.7453	0.654757	0.0001994
FBgn0000183	BicD	28.9777	45.5438	0.652314	0.0001994
FBgn0038180	Cht5	2180.54	3424.61	0.651254	0.0001994
FBgn0004197	Ser	3.23688	5.07204	0.647964	0.0001994
FBgn0267001	Ten-a	28.2127	44.2052	0.647871	0.0001994
FBgn0034789	PIP5K59B	27.5819	43.2157	0.647832	0.0001994
FBgn0013334	Sap47	63.1288	98.828	0.646622	0.0001994
FBgn0038828	CG17270	64.116	100.33	0.645995	0.0001994
FBgn0026415	Idgf4	36.8886	57.7164	0.645806	0.0001994
FBgn0260747	Chchd2	49.3093	77.0811	0.644515	0.0001994
FBgn0285925	Fas1	225.268	352.062	0.644187	0.0001994
FBgn0261862	whd	41.5728	64.8711	0.641936	0.0001994
FBgn0031285	CG3662	77.417	120.798	0.641878	0.0001994
FBgn0050015	CG30015	79.6366	124.184	0.640978	0.0001994
FBgn0035533	Cip4	52.9463	82.5316	0.640418	0.0001994
FBgn0050000	GstT1	34.0906	53.0846	0.638918	0.0001994
FBgn0038922	Idh3b	38.3465	59.692	0.638443	0.0001994
FBgn0265607	beat-IIIa	8.4132	13.0804	0.636684	0.0001994
FBgn0036391	CG17364	7.4346	11.5491	0.635457	0.0001994
FBgn0037336	CG2519	80.0819	124.349	0.634844	0.0001994
FBgn0085370	Pde11	17.8017	27.6083	0.633086	0.0001994
FBgn0040056	CG17698	36.148	55.9872	0.63118	0.0001994
FBgn0028399	TMS1	70.1552	108.616	0.630611	0.0001994
FBgn0037556	CG9636	73.7455	113.986	0.628226	0.0001994
FBgn0285913	red	60.6381	93.6359	0.626837	0.0001994
FBgn0012051	CalpA	27.3691	42.2523	0.62648	0.0001994
FBgn0040752	Prosap	282.679	435.931	0.624935	0.0001994
FBgn0263490	mld	24.0248	37.0323	0.624262	0.0001994
FBgn0264294	Cyt-b5	107.416	165.359	0.622393	0.0001994
FBgn0038385	Fbxl7	26.3406	40.5375	0.621968	0.0001994
FBgn0035425	CG17746	60.98	93.829	0.621697	0.0001994
FBgn0000273	Pka-C1	71.034	109.291	0.621597	0.0001994
FBgn0041789	Pax	24.4409	37.5599	0.619898	0.0001994
FBgn0028663	VhaM9.7-b	72.5102	111.286	0.618013	0.0001994
FBgn0026077	Gasp	48.1653	73.875	0.617092	0.0001994
FBgn0262740	Evi5	21.9847	33.6968	0.616113	0.0001994
FBgn0037758	CG9467	56.3205	86.2894	0.615522	0.0001994
FBgn0037530	EMC1	50.6641	77.5882	0.614873	0.0001994
FBgn0037533	CD98hc	62.8645	96.1614	0.613213	0.0001994
FBgn0029924	CG4586	35.4184	54.1767	0.613174	0.0001994
FBgn0015589	Apc	33.0221	50.499	0.612821	0.0001994
FBgn0052528	parvin	28.6336	43.7795	0.612545	0.0001994
FBgn0259108	futsch	26.5694	40.5725	0.610736	0.0001994
FBgn0031397	CG15385	10.7612	16.4259	0.61014	0.0001994
FBgn0038282	dpr9	35.9553	54.8451	0.609156	0.0001994
FBgn0037028	CG3618	68.891	105.049	0.60868	0.0001994
FBgn0023416	Ac3	15.655	23.8702	0.608589	0.0001994
FBgn0038165	Task6	8.79885	13.403	0.607173	0.0001994
FBgn0052813	CG32813	8.1854	12.4638	0.606615	0.0001994
FBgn0027785	NP15.6	83.935	127.795	0.606491	0.0001994
FBgn0022097	Vha36-1	62.4421	95.0661	0.60641	0.0001994
FBgn0087007	bbg	63.502	96.6754	0.606346	0.0001994
FBgn0024985	CG11448	40.5421	61.6306	0.604226	0.0001994
FBgn0039492	CG6051	19.0657	28.9366	0.601917	0.0001994
FBgn0039349	Ssadh	16.8999	25.6462	0.601731	0.0001994
FBgn0016061	side	16.5221	25.07	0.601563	0.0001994
FBgn0011016	SsRbeta	214.639	325.581	0.601102	0.0001994
FBgn0261397	didum	54.7133	82.9927	0.601093	0.0001994
FBgn0040340	TRAM	73.5232	111.322	0.598467	0.0001994
FBgn0037754	CG8500	36.4164	55.1194	0.597972	0.0001994
FBgn0024947	NTPase	40.4067	61.1572	0.597927	0.0001994
FBgn0035333	CG1317	33.5953	50.8408	0.597729	0.0001994
FBgn0039927	CG11155	88.7409	134.28	0.597577	0.0001994
FBgn0004687	Mlc-c	165.786	250.797	0.597198	0.0001994
FBgn0036147	Plod	34.3978	52.0275	0.596959	0.0001994
FBgn0022029	l(2)k01209	20.0286	30.2482	0.594785	0.0001994
FBgn0015791	Rab14	41.3574	62.451	0.594579	0.0001994
FBgn0017567	ND-23	57.4177	86.6403	0.593543	0.0001994
FBgn0000346	comt	28.5665	43.0841	0.592831	0.0001994
FBgn0052549	CG32549	32.4377	48.8519	0.590744	0.0001994
FBgn0261811	pico	38.0802	57.3427	0.590569	0.0001994
FBgn0036032	CG16711	14.2621	21.4748	0.590455	0.0001994
FBgn0017558	Pdk	17.1484	25.819	0.590356	0.0001994
FBgn0265974	ttv	19.1721	28.8477	0.589452	0.0001994
FBgn0039928	Cals	146.108	219.818	0.589272	0.0001994
FBgn0259143	CG42258	36.1068	54.3032	0.588768	0.0001994
FBgn0026409	Mpcp2	192.72	289.503	0.58707	0.0001994
FBgn0085376	CG34347	27.2589	40.9479	0.587062	0.0001994
FBgn0014184	Oda	540.251	810.494	0.585173	0.0001994
FBgn0033108	CG15236	16.0449	24.0658	0.58487	0.0001994
FBgn0004364	18w	11.1575	16.7257	0.584059	0.0001994
FBgn0051729	CG31729	33.0545	49.5432	0.58384	0.0001994
FBgn0037107	CG7166	32.136	48.1347	0.582888	0.0001994
FBgn0053653	Cadps	78.0851	116.95	0.582773	0.0001994
FBgn0036191	Sugb	13.8245	20.7053	0.582766	0.0001994
FBgn0038926	CG13409	14.2451	21.3152	0.581423	0.0001994
FBgn0031148	Cbs	140.19	209.765	0.581393	0.0001994
FBgn0034518	CG13430	17.1551	25.6669	0.581278	0.0001994
FBgn0035497	CG14995	40.2485	60.184	0.580445	0.0001994
FBgn0028538	Sec71	16.3847	24.4834	0.579453	0.0001994
FBgn0052675	Tango5	26.7343	39.9482	0.57944	0.0001994
FBgn0053988	Mid1	3.60923	5.39235	0.579221	0.0001994
FBgn0263929	jvl	40.9507	61.1179	0.577706	0.0001994
FBgn0027508	Tnks	19.9351	29.7283	0.576526	0.0001994
FBgn0037092	M6	117.147	174.454	0.574532	0.0001994
FBgn0015338	CG5861	50.9466	75.8682	0.574507	0.0001994
FBgn0264975	Nrg	124.666	185.593	0.574067	0.0001994
FBgn0010100	Acon	93.6092	139.308	0.573553	0.0001994
FBgn0041707	7B2	69.1206	102.849	0.573341	0.0001994
FBgn0050291	CG30291	18.8698	28.0765	0.573284	0.0001994
FBgn0051619	nolo	146.101	217.182	0.571937	0.0001994
FBgn0037084	Syx6	30.7771	45.6771	0.569615	0.0001994
FBgn0030329	prtp	56.7666	84.243	0.569515	0.0001994
FBgn0040070	Trx-2	193.377	286.957	0.569419	0.0001994
FBgn0283658	muc	38.7126	57.3213	0.566269	0.0001994
FBgn0001083	fw	18.7312	27.7339	0.566211	0.0001994
FBgn0035086	CG12851	7.66655	11.3491	0.565925	0.0001994
FBgn0041188	Atx2	48.8551	72.0502	0.560494	0.0001994
FBgn0045063	fdl	22.3279	32.8293	0.556136	0.0001994
FBgn0029789	PGAP1	10.1793	14.9521	0.554702	0.0001994
FBgn0031842	Tango1	32.1032	47.1428	0.554319	0.0001994
FBgn0052380	SMSr	14.5669	21.3801	0.55358	0.0001994
FBgn0259176	bun	133.528	195.932	0.553212	0.0001994
FBgn0004574	Rop	96.1937	141.043	0.552121	0.0001994
FBgn0262512	Vha14-1	76.9148	112.718	0.551383	0.0001994
FBgn0283468	slmb	47.8314	70.0778	0.551001	0.0001994
FBgn0005586	Rab3	32.7312	47.923	0.550049	0.0001994
FBgn0043550	Tsp68C	39.5169	57.7621	0.547652	0.0001994
FBgn0040285	Scamp	59.7447	87.2795	0.546832	0.0001994
FBgn0040777	CG14767	140.087	204.649	0.546829	0.0001994
FBgn0260486	Ziz	15.0519	21.9869	0.5467	0.0001994
FBgn0000414	Dab	41.2756	60.2926	0.546691	0.0001994
FBgn0034087	clu	33.2462	48.5588	0.546546	0.0001994
FBgn0086532	Spt-I	35.1092	51.2512	0.545739	0.0001994
FBgn0003301	rut	19.3592	28.2432	0.54488	0.0001994
FBgn0250867	CG42238	21.2989	31.0245	0.542627	0.0001994
FBgn0283500	Sac1	38.9992	56.793	0.54227	0.0001994
FBgn0044826	Pak3	35.287	51.3398	0.54094	0.0001994
FBgn0032949	Lamp1	237.643	345.476	0.539787	0.0001994
FBgn0031590	CG3702	49.6963	72.2273	0.539406	0.0001994
FBgn0038984	AdipoR	84.3704	122.512	0.538119	0.0001994
FBgn0051158	Efa6	39.193	56.895	0.537707	0.0001994
FBgn0051176	CG31176	37.3101	54.1423	0.537193	0.0001994
FBgn0250838	roh	91.7886	133.198	0.537188	0.0001994
FBgn0267519	28SrRNA-Psi:CR45859	39.4166	57.1576	0.536141	0.0001994
FBgn0032292	EMC3	48.4779	70.2863	0.535916	0.0001994
FBgn0283535	Vha26	92.0997	133.391	0.534392	0.0001994
FBgn0037671	VhaM8.9	79.6376	115.271	0.533507	0.0001994
FBgn0261244	inaE	25.6973	37.1663	0.532379	0.0001994
FBgn0036165	chrb	222.781	321.729	0.530216	0.0001994
FBgn0030321	CG1703	24.452	35.3116	0.530192	0.0001994
FBgn0037949	CG17360	16.8687	24.3319	0.528501	0.0001994
FBgn0032151	nAChRalpha6	7.99748	11.5351	0.528409	0.0001994
FBgn0038725	CG6184	12.7407	18.3731	0.52815	0.0001994
FBgn0031830	COX5B	104.929	151.267	0.527691	0.0001994
FBgn0005671	Vha55	84.8201	122.274	0.527641	0.0001994
FBgn0001087	g	36.5347	52.5916	0.525568	0.0001994
FBgn0250814	UQCR-C2	68.1752	98.0985	0.524986	0.0001994
FBgn0027779	VhaSFD	56.6384	81.4005	0.523256	0.0001994
FBgn0033413	prel	26.7755	38.4761	0.523052	0.0001994
FBgn0263395	hppy	19.5103	28.0109	0.521752	0.0001994
FBgn0031815	frj	28.6108	41.0243	0.519918	0.0001994
FBgn0001202	hook	29.091	41.6933	0.519243	0.0001994
FBgn0024187	syd	24.4746	35.0503	0.518138	0.0001994
FBgn0041111	lilli	16.1556	23.1059	0.516226	0.0001994
FBgn0035947	Srp68	43.6216	62.31	0.514422	0.0001994
FBgn0040068	Vav	20.6216	29.4397	0.513606	0.0001994
FBgn0259985	Mppe	41.2808	58.8887	0.512521	0.0001994
FBgn0039900	Syt7	36.6456	52.2478	0.511728	0.0001994
FBgn0262126	Sec24CD	45.1933	64.4313	0.511651	0.0001994
FBgn0052446	Atox1	88.4462	126.055	0.511178	0.0001994
FBgn0262477	FoxP	29.8544	42.5481	0.511152	0.0001994
FBgn0261439	SdhA	60.2263	85.8109	0.510766	0.0001994
FBgn0011826	Pp2B-14D	21.1784	30.1438	0.509269	0.0001994
FBgn0000635	Fas2	201.088	286.205	0.509221	0.0001994
FBgn0038376	Hmt-1	16.4426	23.3705	0.507249	0.0001994
FBgn0015229	glec	123.539	175.517	0.506644	0.0001994
FBgn0019960	Mitofilin	31.1131	44.1792	0.505845	0.0001994
FBgn0051694	CG31694	34.1102	48.4036	0.504913	0.0001994
FBgn0010747	Srp54k	55.2836	78.3466	0.503019	0.0001994
FBgn0011742	Arp2	54.9008	77.7551	0.502109	0.0001994
FBgn0013678	mt:Cyt-b	2915.38	4121.18	0.499374	0.0001994
FBgn0052699	LPCAT	36.1822	51.1215	0.498651	0.0001994
FBgn0051363	Jupiter	729.015	1029.56	0.49801	0.0001994
FBgn0037001	ND-39	53.0176	74.8633	0.497788	0.0001994
FBgn0260858	Ykt6	28.8751	40.7655	0.497525	0.0001994
FBgn0283478	und	62.9984	88.9403	0.497523	0.0001994
FBgn0034985	CG3328	9.38091	13.2388	0.496968	0.0001994
FBgn0034763	RYBP	43.3408	61.1163	0.495832	0.0001994
FBgn0040395	Unc-76	55.5795	78.3438	0.495266	0.0001994
FBgn0030412	Tomosyn	19.6375	27.6774	0.495098	0.0001994
FBgn0039265	CG11790	87.0507	122.662	0.494767	0.0001994
FBgn0036814	CG14073	11.2342	15.8245	0.494258	0.0001994
FBgn0243512	puc	16.8458	23.7166	0.493512	0.0001994
FBgn0031374	Wdr62	36.967	52.0004	0.492284	0.0001994
FBgn0263260	sel	69.9395	98.1999	0.489613	0.0001994
FBgn0035237	CG13917	50.6611	70.9444	0.48581	0.0001994
FBgn0261554	CG42672	54.9555	76.9552	0.485756	0.0001994
FBgn0086357	Sec61alpha	254.8	356.515	0.4846	0.0001994
FBgn0036202	CG6024	88.3462	123.587	0.48429	0.0001994
FBgn0033996	CG11807	29.0277	40.5872	0.483593	0.0001994
FBgn0035060	Eps-15	52.2713	73.0641	0.483143	0.0001994
FBgn0010488	NAT1	180.269	251.889	0.482633	0.0001994
FBgn0033638	CG9005	21.1285	29.5155	0.48228	0.0001994
FBgn0038156	CG14372	21.5101	30.0331	0.481543	0.0001994
FBgn0015737	Hmu	146.556	204.321	0.479383	0.0001994
FBgn0028500	Rich	30.5484	42.5859	0.479277	0.0001994
FBgn0086655	jing	43.1708	60.1287	0.477997	0.0001994
FBgn0039634	alpha-Man-Ib	39.2407	54.6547	0.477996	0.0001994
FBgn0022985	qkr58E-2	32.1407	44.7625	0.477889	0.0001994
FBgn0085391	trv	15.9451	22.1039	0.471188	0.0001994
FBgn0039054	Cow	259.456	359.614	0.470959	0.0001994
FBgn0025700	CG5885	166.13	230.101	0.469952	0.0001994
FBgn0263351	AP-2mu	77.2048	106.849	0.468807	0.0001994
FBgn0262515	VhaAC45	46.0827	63.7638	0.468512	0.0001994
FBgn0035121	Tudor-SN	170.555	235.923	0.468072	0.0001994
FBgn0040281	Aplip1	40.3342	55.755	0.467099	0.0001994
FBgn0028741	fab1	29.732	41.0262	0.464528	0.0001994
FBgn0027491	Cdk5alpha	60.1173	82.818	0.462164	0.0001994
FBgn0243486	rdo	149.978	206.071	0.45839	0.0001994
FBgn0041781	SCAR	46.5155	63.8638	0.457285	0.0001994
FBgn0017566	ND-75	52.9497	72.6829	0.456995	0.0001994
FBgn0013675	mt:CoII	4348.17	5959.23	0.454717	0.0001994
FBgn0023529	CG2918	102.991	140.99	0.453077	0.0001994
FBgn0267795	Frl	38.3738	52.4879	0.45186	0.0001994
FBgn0032796	CG10188	27.9021	38.144	0.451083	0.0001994
FBgn0262160	CG9932	12.614	17.2399	0.450723	0.0001994
FBgn0032217	CG4972	60.3939	82.4767	0.449583	0.0001994
FBgn0039728	CG7896	33.6669	45.9301	0.44811	0.0001994
FBgn0053208	Mical	34.3988	46.8189	0.444732	0.0001994
FBgn0004876	cdi	55.1712	73.9309	0.422263	0.0001994
FBgn0037810	sle	28.4842	21.3143	-0.418338	0.0001994
FBgn0000100	RpLP0	737.864	547.777	-0.429768	0.0001994
FBgn0004419	me31B	156.928	116.417	-0.430797	0.0001994
FBgn0035106	rno	19.7297	14.6012	-0.434284	0.0001994
FBgn0010409	RpL18A	1480.23	1093.74	-0.436545	0.0001994
FBgn0005593	RpL7	1123.5	829.117	-0.438354	0.0001994
FBgn0027057	CSN1b	69.4703	51.0497	-0.444492	0.0001994
FBgn0085430	CG34401	29.2096	21.4589	-0.444866	0.0001994
FBgn0016697	Prosalpha5	145.779	107.002	-0.446146	0.0001994
FBgn0037760	FBXO11	37.5788	27.5279	-0.449026	0.0001994
FBgn0023143	Uba1	175.856	128.738	-0.449956	0.0001994
FBgn0000541	E(bx)	77.9641	56.9696	-0.452616	0.0001994
FBgn0029157	ssh	29.9156	21.8596	-0.452631	0.0001994
FBgn0011604	Iswi	74.9819	54.7864	-0.452724	0.0001994
FBgn0027329	CCT6	130.624	95.4166	-0.453111	0.0001994
FBgn0261797	Dhc64C	44.7606	32.681	-0.453777	0.0001994
FBgn0284436	CCT8	125.245	91.3819	-0.454772	0.0001994
FBgn0038787	CG4360	37.9582	27.6858	-0.455269	0.0001994
FBgn0026577	CG8677	29.9636	21.8513	-0.455489	0.0001994
FBgn0004913	Gnf1	17.4295	12.6955	-0.457217	0.0001994
FBgn0031698	Ncoa6	22.1823	16.149	-0.457965	0.0001994
FBgn0082582	tmod	259.315	188.754	-0.458202	0.0001994
FBgn0030208	PPP4R2r	167.457	121.842	-0.458776	0.0001994
FBgn0033901	O-fut1	197.169	143.116	-0.462248	0.0001994
FBgn0004598	Fur2	43.5851	31.5842	-0.46463	0.0001994
FBgn0040227	eIF3d1	102.934	74.495	-0.466512	0.0001994
FBgn0010825	Gug	48.4887	35.0839	-0.466841	0.0001994
FBgn0003676	CCT1	155.214	112.097	-0.469512	0.0001994
FBgn0022960	vimar	52.5401	37.9074	-0.470942	0.0001994
FBgn0029899	CG14438	18.5482	13.3774	-0.471476	0.0001994
FBgn0034258	eIF3c	155.963	112.462	-0.471776	0.0001994
FBgn0030328	Amun	151.844	109.278	-0.47459	0.0001994
FBgn0001169	H	28.4542	20.4776	-0.474592	0.0001994
FBgn0034277	OstDelta	165.242	118.727	-0.476928	0.0001994
FBgn0038149	GILT1	490.653	352.468	-0.47721	0.0001994
FBgn0011785	BRWD3	31.09	22.3168	-0.47832	0.0001994
FBgn0026239	gukh	83.2666	59.7232	-0.479446	0.0001994
FBgn0020618	Rack1	1215.12	870.358	-0.481422	0.0001994
FBgn0261641	CG42724	95.9263	68.6953	-0.481715	0.0001994
FBgn0003517	sta	1736.01	1242.2	-0.482874	0.0001994
FBgn0023407	B4	28.6587	20.501	-0.483283	0.0001994
FBgn0262115	CG17683	79.4536	56.8296	-0.483471	0.0001994
FBgn0001987	Gli	95.9506	68.6113	-0.483846	0.0001994
FBgn0016059	Sema1b	111.65	79.7211	-0.485944	0.0001994
FBgn0020497	emb	65.0412	46.4022	-0.487161	0.0001994
FBgn0086707	ncm	22.9247	16.3525	-0.487389	0.0001994
FBgn0031474	CG2991	56.5492	40.3101	-0.488366	0.0001994
FBgn0032050	CG13096	35.9489	25.5846	-0.490669	0.0001994
FBgn0042111	CG18766	41.3631	29.4299	-0.491063	0.0001994
FBgn0023537	CG17896	44.54	31.6722	-0.491885	0.0001994
FBgn0035630	CG10576	108.472	77.0983	-0.492555	0.0001994
FBgn0036896	wnd	63.5456	45.1498	-0.493075	0.0001994
FBgn0011710	Septin 1	92.6052	65.7878	-0.493273	0.0001994
FBgn0037252	CG14650	38.7662	27.5283	-0.493881	0.0001994
FBgn0035357	MEP-1	85.2893	60.5638	-0.493908	0.0001994
FBgn0266083	ocm	15.9937	11.354	-0.49431	0.0001994
FBgn0028953	CG14478	55.007	39.0226	-0.495307	0.0001994
FBgn0040283	SMC1	32.3229	22.914	-0.49633	0.0001994
FBgn0001942	eIF4A	1060.25	750.259	-0.498945	0.0001994
FBgn0030996	CG14194	43.9007	31.0585	-0.499253	0.0001994
FBgn0260794	ctrip	72.1737	51.0318	-0.500076	0.0001994
FBgn0002121	l(2)gl	81.6617	57.6221	-0.503037	0.0001994
FBgn0030466	CG15744	23.5499	16.6172	-0.503039	0.0001994
FBgn0029088	disp	15.3108	10.8025	-0.503186	0.0001994
FBgn0036761	MED19	42.1207	29.7179	-0.503198	0.0001994
FBgn0037344	CG2926	39.9162	28.1237	-0.505185	0.0001994
FBgn0037027	HIPP1	41.6943	29.375	-0.505265	0.0001994
FBgn0043900	pygo	18.4201	12.975	-0.505552	0.0001994
FBgn0015320	Ubc2	79.5864	55.9503	-0.508376	0.0001994
FBgn0037261	CG9775	98.9026	69.5177	-0.508628	0.0001994
FBgn0263916	Ent2	61.6935	43.2744	-0.511603	0.0001994
FBgn0000042	Act5C	2917.17	2045.02	-0.512455	0.0001994
FBgn0033636	tou	54.7584	38.357	-0.51359	0.0001994
FBgn0028695	Rpn1	116.203	81.3255	-0.514865	0.0001994
FBgn0027592	MED15	39.3897	27.5594	-0.515272	0.0001994
FBgn0028490	CG31705	33.093	23.1537	-0.515279	0.0001994
FBgn0003189	r	17.3816	12.158	-0.515659	0.0001994
FBgn0033486	dmpd	49.0866	34.3186	-0.51634	0.0001994
FBgn0036316	CG10960	38.0055	26.5692	-0.516453	0.0001994
FBgn0032230	lft	207.158	144.608	-0.518582	0.0001994
FBgn0053087	LRP1	35.5974	24.8463	-0.51874	0.0001994
FBgn0036685	CG6664	56.6622	39.5209	-0.51977	0.0001994
FBgn0039743	CG7946	50.3373	35.1045	-0.51997	0.0001994
FBgn0030266	CG11122	14.0118	9.76569	-0.520851	0.0001994
FBgn0260789	mxc	11.4048	7.94586	-0.521366	0.0001994
FBgn0005771	noc	73.7942	51.402	-0.521681	0.0001994
FBgn0285954	caz	105.954	73.7932	-0.521875	0.0001994
FBgn0038870	Oga	32.3545	22.523	-0.522567	0.0001994
FBgn0031077	THADA	10.1913	7.09176	-0.523122	0.0001994
FBgn0032454	CG5787	48.7799	33.9066	-0.524719	0.0001994
FBgn0000017	Abl	103.601	71.9866	-0.52524	0.0001994
FBgn0004395	unk	28.6494	19.9052	-0.525362	0.0001994
FBgn0039348	Npl4	42.7466	29.6915	-0.525758	0.0001994
FBgn0028474	CG4119	32.9757	22.8953	-0.526352	0.0001994
FBgn0261394	Prosalpha3	150.31	104.341	-0.526641	0.0001994
FBgn0020910	RpL3	1050.04	728.744	-0.526953	0.0001994
FBgn0265274	Inx3	262.88	182.374	-0.527508	0.0001994
FBgn0026597	Axn	40.6232	28.1489	-0.529223	0.0001994
FBgn0035099	CG6845	22.5942	15.6448	-0.530275	0.0001994
FBgn0036134	FoxK	44.7612	30.9666	-0.531536	0.0001994
FBgn0016797	fz2	86.7499	60.0034	-0.531818	0.0001994
FBgn0040066	wds	31.82	22.0057	-0.532058	0.0001994
FBgn0260962	pic	34.1324	23.5901	-0.532961	0.0001994
FBgn0004066	Prosalpha4	124.011	85.5996	-0.53479	0.0001994
FBgn0028982	Spt6	40.5115	27.9629	-0.534821	0.0001994
FBgn0037926	Elp1	18.3944	12.6939	-0.535134	0.0001994
FBgn0000559	eEF2	1153.97	796.211	-0.535384	0.0001994
FBgn0028688	Rpn7	125.925	86.7939	-0.536898	0.0001994
FBgn0033886	Rpn13	82.2532	56.6464	-0.538087	0.0001994
FBgn0031051	Ranbp21	20.2868	13.9666	-0.538567	0.0001994
FBgn0031606	CG15439	13.1104	9.02428	-0.538833	0.0001994
FBgn0082831	pps	23.1502	15.9254	-0.539697	0.0001994
FBgn0016794	dos	34.3702	23.6175	-0.5413	0.0001994
FBgn0262714	Sap130	37.1472	25.5137	-0.541982	0.0001994
FBgn0020521	pio	207.526	142.526	-0.542072	0.0001994
FBgn0262519	Mi-2	96.7436	66.4279	-0.542376	0.0001994
FBgn0027603	Ulp1	49.2958	33.824	-0.543418	0.0001994
FBgn0035872	CG7185	82.3072	56.4189	-0.544839	0.0001994
FBgn0016984	sktl	22.5805	15.4776	-0.544894	0.0001994
FBgn0036290	CG10638	56.8366	38.9361	-0.545712	0.0001994
FBgn0014455	Ahcy	40.3109	27.586	-0.547234	0.0001994
FBgn0035830	CG8209	100.348	68.615	-0.548412	0.0001994
FBgn0002914	Myb	60.2134	41.1598	-0.548849	0.0001994
FBgn0037622	CG8202	18.9099	12.921	-0.549421	0.0001994
FBgn0037026	CG3634	25.5696	17.454	-0.550869	0.0001994
FBgn0001233	Hsp83	764.362	521.682	-0.551084	0.0001994
FBgn0031996	CG8460	67.851	46.3039	-0.551234	0.0001994
FBgn0001254	ImpE2	1550.72	1056.7	-0.553367	0.0001994
FBgn0027341	Gfat1	41.9419	28.555	-0.554647	0.0001994
FBgn0000181	bic	355.357	241.874	-0.555014	0.0001994
FBgn0250746	Prosbeta7	124.535	84.7383	-0.555461	0.0001994
FBgn0034982	Naa35	28.348	19.2875	-0.55558	0.0001994
FBgn0263396	sqd	265.959	180.927	-0.555795	0.0001994
FBgn0261885	osa	53.8543	36.5836	-0.557864	0.0001994
FBgn0031078	Nup205	21.168	14.3794	-0.557883	0.0001994
FBgn0010300	brat	162.971	110.645	-0.558681	0.0001994
FBgn0019637	Atu	29.6219	20.0656	-0.561941	0.0001994
FBgn0259139	glo	184.538	124.904	-0.563104	0.0001994
FBgn0051122	CG31122	33.6658	22.7634	-0.564571	0.0001994
FBgn0032295	CG12299	41.1917	27.8133	-0.566577	0.0001994
FBgn0013732	sced	18.0519	12.1829	-0.567289	0.0001994
FBgn0000283	Cp190	55.815	37.6526	-0.567903	0.0001994
FBgn0033688	Prp8	60.3471	40.7002	-0.568248	0.0001994
FBgn0261461	RhoGAP18B	21.4479	14.4618	-0.568589	0.0001994
FBgn0265574	Cdc5	24.6513	16.6153	-0.569145	0.0001994
FBgn0011260	Sema2a	133.125	89.7216	-0.569258	0.0001994
FBgn0014366	noi	34.8877	23.5014	-0.569972	0.0001994
FBgn0263599	l(3)72Ab	56.188	37.8438	-0.570206	0.0001994
FBgn0024314	Plap	52.291	35.2021	-0.570903	0.0001994
FBgn0037372	CG2091	40.8694	27.5112	-0.571003	0.0001994
FBgn0283682	Ge-1	51.8638	34.8981	-0.571581	0.0001994
FBgn0032656	CG5674	36.5862	24.6143	-0.571805	0.0001994
FBgn0028693	Rpn12	156.429	105.219	-0.572113	0.0001994
FBgn0038476	kuk	286.327	192.56	-0.572353	0.0001994
FBgn0039004	Nup133	16.7283	11.2359	-0.574176	0.0001994
FBgn0033988	pcs	44.0711	29.5971	-0.574379	0.0001994
FBgn0039227	polybromo	16.7012	11.205	-0.575811	0.0001994
FBgn0259938	cwo	11.7066	7.85407	-0.575812	0.0001994
FBgn0005777	PpD3	38.4665	25.7874	-0.576936	0.0001994
FBgn0002576	lz	39.2894	26.3303	-0.57742	0.0001994
FBgn0025626	CG4281	25.3636	16.9903	-0.578048	0.0001994
FBgn0023097	bon	49.5416	33.1682	-0.578839	0.0001994
FBgn0086134	Prosalpha2	157.027	105.103	-0.579216	0.0001994
FBgn0015282	Rpt2	150.315	100.592	-0.579476	0.0001994
FBgn0015838	Vang	62.2376	41.6432	-0.579707	0.0001994
FBgn0010660	Nup214	27.1988	18.1971	-0.579835	0.0001994
FBgn0000535	eag	10.2858	6.86946	-0.582382	0.0001994
FBgn0033050	Pngl	37.7073	25.1828	-0.582408	0.0001994
FBgn0014024	Rnp4F	28.3137	18.8899	-0.583884	0.0001994
FBgn0002932	neur	86.8718	57.9404	-0.584318	0.0001994
FBgn0026679	IntS4	14.29	9.52726	-0.584873	0.0001994
FBgn0035945	CG5026	21.0881	14.0545	-0.585391	0.0001994
FBgn0046214	vig2	177.624	118.351	-0.585756	0.0001994
FBgn0036847	CNPYb	127.67	85.0561	-0.585936	0.0001994
FBgn0039338	XNP	70.2073	46.766	-0.586161	0.0001994
FBgn0035997	phol	27.9501	18.5975	-0.587745	0.0001994
FBgn0064126	CG33722	32.2578	21.4478	-0.588818	0.0001994
FBgn0030082	HP1b	59.8474	39.7576	-0.590059	0.0001994
FBgn0030091	CG7065	22.416	14.8886	-0.590321	0.0001994
FBgn0030768	CG9723	56.4076	37.3977	-0.592938	0.0001994
FBgn0039266	CG11791	62.1594	41.2066	-0.593098	0.0001994
FBgn0034282	Mapmodulin	179.073	118.674	-0.593543	0.0001994
FBgn0050122	CG30122	96.3629	63.7923	-0.595096	0.0001994
FBgn0260012	pds5	36.5862	24.2166	-0.595303	0.0001994
FBgn0041096	rols	26.9551	17.8318	-0.596105	0.0001994
FBgn0013263	Trl	77.0482	50.9487	-0.596715	0.0001994
FBgn0250843	Prosalpha6	144.926	95.8332	-0.59672	0.0001994
FBgn0033879	CG6543	76.3811	50.4906	-0.5972	0.0001994
FBgn0027568	Cand1	46.1804	30.5133	-0.597844	0.0001994
FBgn0036624	RAF2	31.9769	21.0902	-0.600456	0.0001994
FBgn0022764	Sin3A	66.2956	43.6891	-0.60164	0.0001994
FBgn0033654	Sobp	9.94352	6.54328	-0.603744	0.0001994
FBgn0030806	CG13001	30.4558	20.0209	-0.605214	0.0001994
FBgn0031947	CG7154	31.6964	20.8268	-0.605879	0.0001994
FBgn0039016	Dcr-1	11.5109	7.56171	-0.60621	0.0001994
FBgn0035770	pst	43.6271	28.657	-0.606336	0.0001994
FBgn0263594	lost	225.519	148.086	-0.606814	0.0001994
FBgn0032156	CG13124	28.2752	18.566	-0.606872	0.0001994
FBgn0033122	CG17002	19.3327	12.6938	-0.606922	0.0001994
FBgn0011715	Snr1	63.4522	41.6616	-0.606954	0.0001994
FBgn0030086	CCT2	156.071	102.388	-0.608155	0.0001994
FBgn0267791	HnRNP-K	149.387	98.0023	-0.608172	0.0001994
FBgn0052365	CG32365	15.7324	10.3204	-0.608238	0.0001994
FBgn0025781	Cdc16	20.7629	13.6194	-0.608347	0.0001994
FBgn0050020	CG30020	18.8433	12.3575	-0.608665	0.0001994
FBgn0037541	CG2747	91.0896	59.7236	-0.608985	0.0001994
FBgn0039863	CG1815	49.7567	32.614	-0.609399	0.0001994
FBgn0039302	Nup358	66.6444	43.6656	-0.609987	0.0001994
FBgn0034606	ASPP	29.8879	19.5745	-0.61059	0.0001994
FBgn0086694	Bre1	33.3452	21.7929	-0.613623	0.0001994
FBgn0020381	Dredd	37.6934	24.6341	-0.613655	0.0001994
FBgn0029905	Nf-YC	13.0893	8.55166	-0.614115	0.0001994
FBgn0262955	RpII140	63.0693	41.2043	-0.614145	0.0001994
FBgn0010602	lwr	175.2	114.444	-0.61436	0.0001994
FBgn0039654	Brd8	21.2922	13.8872	-0.616566	0.0001994
FBgn0031144	CG1529	13.4971	8.79904	-0.617228	0.0001994
FBgn0037255	Fip1	28.8567	18.7973	-0.618378	0.0001994
FBgn0027951	MTA1-like	65.9109	42.9008	-0.619513	0.0001994
FBgn0003261	Rm62	402.22	261.79	-0.619577	0.0001994
FBgn0033766	CG8771	15.6498	10.1702	-0.621792	0.0001994
FBgn0037248	srl	13.3932	8.6937	-0.623458	0.0001994
FBgn0040071	tara	32.0709	20.8155	-0.623605	0.0001994
FBgn0000261	Cat	183.219	118.87	-0.624182	0.0001994
FBgn0015925	csul	20.0684	13.0159	-0.624653	0.0001994
FBgn0020306	dom	48.1144	31.1816	-0.625774	0.0001994
FBgn0085451	htk	24.4466	15.839	-0.626158	0.0001994
FBgn0031118	RhoGAP19D	21.8473	14.1313	-0.628563	0.0001994
FBgn0003062	Fib	41.1176	26.5906	-0.628838	0.0001994
FBgn0000116	Argk	879.249	568.447	-0.629246	0.0001994
FBgn0011327	Uch-L5	54.999	35.5012	-0.631537	0.0001994
FBgn0039558	BCAS2	40.8906	26.3828	-0.63217	0.0001994
FBgn0035033	CG3548	32.5375	20.9914	-0.632308	0.0001994
FBgn0024432	Dlc90F	243.743	157.207	-0.632692	0.0001994
FBgn0283494	Adk2	60.9553	39.3039	-0.633077	0.0001994
FBgn0038115	CG7966	24.4348	15.7238	-0.635989	0.0001994
FBgn0028692	Rpn2	101.374	65.2209	-0.636274	0.0001994
FBgn0037135	CG7414	130.18	83.751	-0.636334	0.0001994
FBgn0015904	ara	16.0399	10.3146	-0.636982	0.0001994
FBgn0035402	Usp5	66.3846	42.6732	-0.637516	0.0001994
FBgn0027053	CSN5	61.2504	39.3377	-0.638807	0.0001994
FBgn0034859	CG3520	9.9968	6.41809	-0.639323	0.0001994
FBgn0004638	drk	121.085	77.6872	-0.640273	0.0001994
FBgn0278608	Dsp1	77.3833	49.6388	-0.640555	0.0001994
FBgn0039507	mrt	28.0263	17.9701	-0.641178	0.0001994
FBgn0003205	Ras85D	108.428	69.5139	-0.641367	0.0001994
FBgn0034093	CG15706	44.2406	28.3569	-0.64167	0.0001994
FBgn0000119	arr	37.7461	24.185	-0.642215	0.0001994
FBgn0016983	smid	61.8876	39.5947	-0.644344	0.0001994
FBgn0261573	CoRest	70.1218	44.829	-0.645431	0.0001994
FBgn0263933	ebi	38.1219	24.3486	-0.646778	0.0001994
FBgn0001091	Gapdh1	103.276	65.9326	-0.647448	0.0001994
FBgn0025825	HDAC3	32.5222	20.7152	-0.650737	0.0001994
FBgn0002638	Rcc1	19.6517	12.5167	-0.650797	0.0001994
FBgn0038540	CG14321	71.0205	45.2308	-0.65093	0.0001994
FBgn0004860	ph-d	26.9039	17.1295	-0.651332	0.0001994
FBgn0260632	dl	7.17187	4.56537	-0.651617	0.0001994
FBgn0029766	CG15784	21.7307	13.8102	-0.653994	0.0001994
FBgn0026084	cib	889.199	565.025	-0.654192	0.0001994
FBgn0036663	CG9674	90.5452	57.4863	-0.65542	0.0001994
FBgn0030418	CG4004	28.1047	17.8356	-0.656048	0.0001994
FBgn0028694	Rpn11	115.573	73.2614	-0.657677	0.0001994
FBgn0034070	SP2353	105.348	66.7712	-0.657864	0.0001994
FBgn0035713	velo	57.1908	36.2134	-0.659258	0.0001994
FBgn0036052	CG10809	17.5051	11.0829	-0.659435	0.0001994
FBgn0042134	Capr	127.442	80.6696	-0.659747	0.0001994
FBgn0011760	ctp	268.047	169.548	-0.660793	0.0001994
FBgn0031053	CG14223	18.8319	11.9021	-0.661967	0.0001994
FBgn0040238	Best1	18.4048	11.6284	-0.662426	0.0001994
FBgn0260985	RfC4	22.8245	14.4083	-0.663686	0.0001994
FBgn0010417	Taf6	25.7921	16.2706	-0.664664	0.0001994
FBgn0030631	CG6227	15.9502	10.0598	-0.664977	0.0001994
FBgn0038551	Odj	19.8893	12.5248	-0.667202	0.0001994
FBgn0037607	CG8036	326.196	205.402	-0.667291	0.0001994
FBgn0016926	Pino	48.0523	30.257	-0.667337	0.0001994
FBgn0004390	RasGAP1	46.0618	28.9828	-0.668373	0.0001994
FBgn0034488	CG11208	51.9833	32.7026	-0.668641	0.0001994
FBgn0001139	gro	74.1878	46.6369	-0.66971	0.0001994
FBgn0035767	Cln7	113.469	71.2771	-0.670781	0.0001994
FBgn0030034	CG10555	46.3337	29.0612	-0.672971	0.0001994
FBgn0262601	SmB	112.839	70.7427	-0.673615	0.0001994
FBgn0003460	so	70.124	43.9328	-0.674608	0.0001994
FBgn0020309	crol	136.451	85.3458	-0.67699	0.0001994
FBgn0014857	His3.3A	343.465	214.573	-0.678693	0.0001994
FBgn0036710	CG6479	17.5795	10.9759	-0.67956	0.0001994
FBgn0085414	dpr12	55.2799	34.5019	-0.680079	0.0001994
FBgn0038768	CG4936	19.4539	12.1362	-0.680738	0.0001994
FBgn0031401	papi	17.1325	10.6744	-0.682583	0.0001994
FBgn0032321	YL-1	17.9594	11.183	-0.683427	0.0001994
FBgn0035162	Sf3b3	91.3594	56.8635	-0.68405	0.0001994
FBgn0033188	Drat	67.9643	42.2622	-0.685408	0.0001994
FBgn0028371	jbug	78.6051	48.8732	-0.68558	0.0001994
FBgn0024191	sip1	9.11384	5.66235	-0.686659	0.0001994
FBgn0024698	Cpsf160	14.7111	9.13572	-0.687318	0.0001994
FBgn0264090	CG43759	13.0477	8.10212	-0.687422	0.0001994
FBgn0011726	tsr	1079.16	670.031	-0.687608	0.0001994
FBgn0004880	scrt	52.4097	32.5217	-0.68843	0.0001994
FBgn0001324	kto	21.8647	13.5615	-0.689084	0.0001994
FBgn0031149	Stt3A	113.386	70.308	-0.689475	0.0001994
FBgn0004401	Pep	286.496	177.625	-0.68968	0.0001994
FBgn0022213	Cse1	47.6658	29.5328	-0.690637	0.0001994
FBgn0019650	toy	89.2664	55.2809	-0.691335	0.0001994
FBgn0035169	CG13890	48.2343	29.8607	-0.691809	0.0001994
FBgn0036897	CG8786	22.0488	13.646	-0.69222	0.0001994
FBgn0261119	Prp19	53.6319	33.1337	-0.694794	0.0001994
FBgn0266917	Sf3a1	34.2101	21.1317	-0.695013	0.0001994
FBgn0037504	CG1142	47.7996	29.5227	-0.695174	0.0001994
FBgn0033875	CG6357	96.9169	59.7863	-0.696934	0.0001994
FBgn0003275	RpII18	74.3171	45.8406	-0.69707	0.0001994
FBgn0033529	CG17765	90.7342	55.9599	-0.697251	0.0001994
FBgn0033926	Arc1	25.9035	15.9413	-0.700377	0.0001994
FBgn0032248	Bug22	39.4367	24.2602	-0.700947	0.0001994
FBgn0033929	Tfb1	38.7887	23.8433	-0.702049	0.0001994
FBgn0266566	CG45105	13.1931	8.10872	-0.702233	0.0001994
FBgn0040233	cana	11.4114	7.01227	-0.702526	0.0001994
FBgn0021761	Nup154	25.5963	15.7287	-0.70253	0.0001994
FBgn0027526	Ublcp1	36.3329	22.3156	-0.703222	0.0001994
FBgn0259937	Nop60B	47.582	29.2088	-0.704011	0.0001994
FBgn0086677	jeb	65.9126	40.443	-0.704664	0.0001994
FBgn0051472	sgll	40.859	25.065	-0.704979	0.0001994
FBgn0015903	apt	7.63931	4.68402	-0.705695	0.0001994
FBgn0037913	fabp	690.152	423.036	-0.706132	0.0001994
FBgn0034246	Dcr-2	42.6245	26.1262	-0.706187	0.0001994
FBgn0261445	sgl	43.0787	26.3827	-0.707382	0.0001994
FBgn0000524	dx	29.6087	18.1222	-0.708267	0.0001994
FBgn0001321	knk	15.4853	9.46531	-0.710179	0.0001994
FBgn0032016	Mettl14	29.9968	18.3204	-0.71136	0.0001994
FBgn0030854	CG8289	85.8975	52.4528	-0.711596	0.0001994
FBgn0014427	CG11899	218.405	133.225	-0.713134	0.0001994
FBgn0040493	grsm	72.1294	43.9799	-0.713744	0.0001994
FBgn0034118	Nup62	36.1117	22.0014	-0.714875	0.0001994
FBgn0032741	Sidpn	47.7087	29.0364	-0.716386	0.0001994
FBgn0032348	CG4751	31.2687	19.0226	-0.717005	0.0001994
FBgn0027287	Gmap	13.4386	8.16643	-0.718605	0.0001994
FBgn0029508	Tsp42Ea	65.3632	39.716	-0.718759	0.0001994
FBgn0039566	CG4849	22.3902	13.5855	-0.720802	0.0001994
FBgn0038578	MED17	26.4061	16.0206	-0.720944	0.0001994
FBgn0027600	obst-B	263.162	159.555	-0.721891	0.0001994
FBgn0004861	ph-p	37.787	22.8844	-0.723523	0.0001994
FBgn0000412	D1	220.326	133.34	-0.724531	0.0001994
FBgn0038043	CG17202	71.9926	43.4984	-0.726888	0.0001994
FBgn0020392	Nmt	64.6554	39.0369	-0.72793	0.0001994
FBgn0031740	CG7239	18.8111	11.347	-0.729267	0.0001994
FBgn0020496	CtBP	182.384	109.884	-0.730996	0.0001994
FBgn0086253	rumi	29.9224	18.0245	-0.731266	0.0001994
FBgn0031611	FIG4	26.2011	15.7794	-0.731581	0.0001994
FBgn0267385	PyK	56.6456	34.1047	-0.731993	0.0001994
FBgn0086855	CG17078	43.6539	26.279	-0.732201	0.0001994
FBgn0034860	CG9812	37.2302	22.4064	-0.732562	0.0001994
FBgn0030969	Usp39	23.1425	13.9217	-0.733204	0.0001994
FBgn0043456	CG4747	101.472	61.0155	-0.733833	0.0001994
FBgn0039431	plum	65.7773	39.5127	-0.735271	0.0001994
FBgn0040373	CG3038	38.5187	23.1313	-0.735712	0.0001994
FBgn0027537	Nup93-1	24.1052	14.469	-0.736376	0.0001994
FBgn0025388	CG12179	4.71991	2.83255	-0.736656	0.0001994
FBgn0263998	Ack-like	58.0637	34.8139	-0.737973	0.0001994
FBgn0265137	Spn42Da	39.1754	23.4827	-0.738349	0.0001994
FBgn0028978	trbl	15.6153	9.35734	-0.738788	0.0001994
FBgn0025519	fidipidine	20.245	12.13	-0.738991	0.0001994
FBgn0038842	hdly	16.2859	9.75684	-0.739138	0.0001994
FBgn0039631	Sirt7	9.26983	5.5511	-0.73977	0.0001994
FBgn0030240	CG2202	16.9079	10.1135	-0.741423	0.0001994
FBgn0004643	Zw10	21.9892	13.128	-0.744152	0.0001994
FBgn0032671	CG7200	16.5177	9.85912	-0.744479	0.0001994
FBgn0031973	Spn28Dc	20.4431	12.1995	-0.744788	0.0001994
FBgn0031885	Mnn1	19.4606	11.602	-0.746176	0.0001994
FBgn0261933	SmD1	52.2229	31.0995	-0.74779	0.0001994
FBgn0003984	vn	10.2709	6.10462	-0.750595	0.0001994
FBgn0017551	Rca1	34.3158	20.377	-0.751932	0.0001994
FBgn0040078	pont	43.4881	25.8208	-0.752086	0.0001994
FBgn0051036	CG31036	5.52706	3.27747	-0.75393	0.0001994
FBgn0011766	E2f1	91.7755	54.3477	-0.755888	0.0001994
FBgn0042085	Bap170	21.5156	12.7326	-0.756857	0.0001994
FBgn0003607	Su(var)205	229.112	135.528	-0.757455	0.0001994
FBgn0004367	mei-41	5.3878	3.17579	-0.762583	0.0001994
FBgn0025693	ZnT41F	18.3177	10.7909	-0.76342	0.0001994
FBgn0011763	Dp	62.3793	36.705	-0.76509	0.0001994
FBgn0033476	oys	29.8889	17.5727	-0.766271	0.0001994
FBgn0002552	lin	16.4509	9.65847	-0.768303	0.0001994
FBgn0033876	Syngr	13.934	8.1799	-0.76845	0.0001994
FBgn0263132	Cht6	9.98452	5.85918	-0.768994	0.0001994
FBgn0003328	scb	16.1186	9.45407	-0.769723	0.0001994
FBgn0003892	ptc	39.0852	22.9215	-0.769921	0.0001994
FBgn0262169	magu	13.4284	7.87078	-0.770711	0.0001994
FBgn0036732	Oatp74D	35.3047	20.6837	-0.771364	0.0001994
FBgn0041182	Tep2	13.0392	7.63479	-0.772193	0.0001994
FBgn0034946	CG3065	33.2357	19.4532	-0.772726	0.0001994
FBgn0052676	stx	58.6992	34.3	-0.775132	0.0001994
FBgn0015818	Spx	26.2792	15.3495	-0.775733	0.0001994
FBgn0000212	brm	62.6504	36.5741	-0.7765	0.0001994
FBgn0284245	eEF1alpha1	2611.06	1524.22	-0.776564	0.0001994
FBgn0027378	MRG15	24.7126	14.3621	-0.782977	0.0001994
FBgn0037670	Ibf1	26.0858	15.1558	-0.783398	0.0001994
FBgn0284221	Sema5c	84.4384	49.0521	-0.783586	0.0001994
FBgn0034939	thoc5	35.7509	20.7653	-0.783805	0.0001994
FBgn0032682	grnd	32.5658	18.9118	-0.784071	0.0001994
FBgn0041180	Tep4	41.0028	23.8048	-0.78447	0.0001994
FBgn0015393	hoip	55.6941	32.3314	-0.78459	0.0001994
FBgn0020379	Rfx	12.1591	7.05611	-0.785095	0.0001994
FBgn0086613	Ino80	13.1246	7.61223	-0.785879	0.0001994
FBgn0015075	Ddx1	34.7406	20.0749	-0.79123	0.0001994
FBgn0023177	Pp4-19C	76.9825	44.4771	-0.791467	0.0001994
FBgn0026427	Su(var)2-HP2	25.5837	14.76	-0.793529	0.0001994
FBgn0010226	GstS1	250.122	144.185	-0.794711	0.0001994
FBgn0037834	Art1	66.4315	38.2883	-0.794963	0.0001994
FBgn0052831	CG33695	17.5256	10.0963	-0.795633	0.0001994
FBgn0039215	CG6695	26.797	15.4347	-0.795895	0.0001994
FBgn0028473	Non1	108.396	62.4228	-0.796165	0.0001994
FBgn0004391	shtd	6.45088	3.71338	-0.796763	0.0001994
FBgn0263979	Caf1-55	83.8018	48.2019	-0.797891	0.0001994
FBgn0030365	Tango4	24.4361	14.0533	-0.798102	0.0001994
FBgn0037836	CG14692	2.08937	1.19912	-0.801089	0.0001994
FBgn0284084	wg	11.6457	6.68344	-0.801133	0.0001994
FBgn0052438	SMC5	12.8032	7.34008	-0.802635	0.0001994
FBgn0011836	Taf2	20.8871	11.9644	-0.80386	0.0001994
FBgn0004106	Cdk1	69.4255	39.7065	-0.806091	0.0001994
FBgn0052707	APC4	10.5508	6.02864	-0.807443	0.0001994
FBgn0038771	CG4390	88.3179	50.4352	-0.808275	0.0001994
FBgn0015778	rin	150.015	85.6012	-0.8094	0.0001994
FBgn0033998	row	54.7967	31.2643	-0.809574	0.0001994
FBgn0265192	Snp	114.381	65.2525	-0.809741	0.0001994
FBgn0039640	CG14516	30.2946	17.2587	-0.811738	0.0001994
FBgn0022893	Df31	1513.62	862.218	-0.811882	0.0001994
FBgn0250754	CG42232	28.4307	16.1825	-0.813014	0.0001994
FBgn0027841	CstF64	24.6822	14.0472	-0.813184	0.0001994
FBgn0030710	CG8924	18.3799	10.4528	-0.814234	0.0001994
FBgn0015602	BEAF-32	52.2604	29.7153	-0.814512	0.0001994
FBgn0050115	GEFmeso	54.0108	30.689	-0.815526	0.0001994
FBgn0029878	Pat1	41.4997	23.5773	-0.815703	0.0001994
FBgn0000043	Act42A	852.792	483.636	-0.818273	0.0001994
FBgn0052687	CG32687	10.5725	5.98774	-0.820232	0.0001994
FBgn0003345	sd	80.1523	45.3672	-0.821095	0.0001994
FBgn0041171	ago	77.7254	43.9892	-0.821238	0.0001994
FBgn0004832	Xpac	17.2194	9.7363	-0.822589	0.0001994
FBgn0004837	Su(H)	32.664	18.4649	-0.822915	0.0001994
FBgn0025186	ari-2	99.1572	56.0309	-0.823496	0.0001994
FBgn0022349	CG1910	73.8504	41.6997	-0.824571	0.0001994
FBgn0031638	CG11927	29.8258	16.8393	-0.824733	0.0001994
FBgn0030738	CG9915	27.6783	15.625	-0.824896	0.0001994
FBgn0264922	smt3	848.07	478.647	-0.825221	0.0001994
FBgn0014189	Hel25E	176.005	99.2925	-0.825864	0.0001994
FBgn0003997	hid	49.8344	28.0995	-0.826598	0.0001994
FBgn0260771	Larp7	17.3821	9.79537	-0.827427	0.0001994
FBgn0030662	CG9220	11.0334	6.21366	-0.828358	0.0001994
FBgn0263392	Tet	60.801	34.2328	-0.828716	0.0001994
FBgn0031052	CG14215	16.479	9.27815	-0.828722	0.0001994
FBgn0004618	gl	235.147	132.347	-0.829234	0.0001994
FBgn0051028	CG31028	16.2297	9.13116	-0.829764	0.0001994
FBgn0051092	LpR2	35.8408	20.1577	-0.830269	0.0001994
FBgn0031047	Rcd-1	129.994	73.0546	-0.831398	0.0001994
FBgn0000543	ecd	27.367	15.3413	-0.835016	0.0001994
FBgn0050361	mtt	8.72377	4.88377	-0.836955	0.0001994
FBgn0086908	egg	23.1281	12.9442	-0.837341	0.0001994
FBgn0026376	Rgl	46.673	26.0338	-0.842201	0.0001994
FBgn0027932	Akap200	540.993	301.405	-0.843905	0.0001994
FBgn0002526	LanA	12.1404	6.74803	-0.847281	0.0001994
FBgn0026404	Dronc	40.9432	22.7233	-0.849454	0.0001994
FBgn0001104	Galphai	102.192	56.562	-0.853382	0.0001994
FBgn0025716	Bap55	80.978	44.7264	-0.856405	0.0001994
FBgn0015919	caup	11.8512	6.54492	-0.85659	0.0001994
FBgn0035844	CG13676	51.0481	28.185	-0.85693	0.0001994
FBgn0266441	CG45071	37.1333	20.444	-0.861035	0.0001994
FBgn0031126	Cyp6v1	16.868	9.28597	-0.861167	0.0001994
FBgn0033649	pyr	16.5807	9.12223	-0.862046	0.0001994
FBgn0034430	mip40	29.391	16.1625	-0.862722	0.0001994
FBgn0028979	tio	5.78502	3.16847	-0.868534	0.0001994
FBgn0039350	jigr1	67.5575	36.9994	-0.868616	0.0001994
FBgn0035390	scramb2	97.5804	53.3579	-0.870889	0.0001994
FBgn0036360	CG10713	7.22505	3.95014	-0.871104	0.0001994
FBgn0261004	asl	11.999	6.55945	-0.871261	0.0001994
FBgn0003079	Raf	20.2971	11.0831	-0.872917	0.0001994
FBgn0016131	Cdk4	23.9799	13.0902	-0.873342	0.0001994
FBgn0041147	ida	9.31864	5.07689	-0.876174	0.0001994
FBgn0032955	CG2201	51.4818	28.0435	-0.876397	0.0001994
FBgn0010750	atms	40.0567	21.8139	-0.876796	0.0001994
FBgn0034264	Dlish	36.6239	19.9265	-0.878099	0.0001994
FBgn0035210	msd5	21.8412	11.877	-0.878883	0.0001994
FBgn0038300	Mau2	11.4363	6.20741	-0.881561	0.0001994
FBgn0025457	Bub3	93.8919	50.9621	-0.881576	0.0001994
FBgn0266377	Pde8	11.4035	6.18456	-0.882734	0.0001994
FBgn0027868	Nup107	20.2009	10.946	-0.884023	0.0001994
FBgn0002791	mr	22.3814	12.1255	-0.884259	0.0001994
FBgn0000426	SmF	137.737	74.5676	-0.885291	0.0001994
FBgn0033210	U2A	34.6012	18.7271	-0.885694	0.0001994
FBgn0038274	Nup93-2	17.2184	9.31783	-0.885883	0.0001994
FBgn0033528	trsn	70.1471	37.9356	-0.886831	0.0001994
FBgn0034354	GstE11	84.14	45.4984	-0.886976	0.0001994
FBgn0082598	akirin	170.537	92.2171	-0.886982	0.0001994
FBgn0034795	MED23	28.1931	15.2374	-0.887721	0.0001994
FBgn0030629	CG9123	10.2081	5.51268	-0.88889	0.0001994
FBgn0000308	chic	447.009	240.613	-0.89359	0.0001994
FBgn0005624	Psc	29.7472	15.991	-0.895489	0.0001994
FBgn0005642	wdn	22.2618	11.9434	-0.89836	0.0001994
FBgn0262647	Nup160	16.66	8.93798	-0.898365	0.0001994
[truncated: 15,651 more rows]

## Sheet: Table S2
Table S2: Gene Ontology analysis for all significant differentially expressed genes between 21 and 40 h APF
Biological Process	Number of differentially expressed genes	p-value
biological regulation (GO:0065007)	1979	3.66e-52
cellular process (GO:0009987)	2751	6.01e-48
regulation of biological process (GO:0050789)	1790	7.78e-48
regulation of cellular process (GO:0050794)	1665	8.58e-45
system development (GO:0048731)	944	9.97e-43
multicellular organism development (GO:0007275)	1164	3.72e-39
anatomical structure development (GO:0048856)	1300	4.38e-39
developmental process (GO:0032502)	1323	5.47e-39
anatomical structure morphogenesis (GO:0009653)	801	5.73e-31
animal organ development (GO:0048513)	672	6.49e-31
cellular component organization (GO:0016043)	1231	4.88e-29
multicellular organismal process (GO:0032501)	1527	2.34e-28
cellular developmental process (GO:0048869)	869	4.45e-28
nervous system development (GO:0007399)	614	4.55e-28
cell differentiation (GO:0030154)	849	9.93e-28
cellular component organization or biogenesis (GO:0071840)	1268	5.87e-27
neurogenesis (GO:0022008)	522	6.15e-24
generation of neurons (GO:0048699)	502	2.03e-23
cell development (GO:0048468)	688	4.16e-23
tissue development (GO:0009888)	577	1.51e-22
neuron differentiation (GO:0030182)	422	3.14e-22
animal organ morphogenesis (GO:0009887)	434	4.63e-21
epithelium development (GO:0060429)	531	5.7e-21
tube development (GO:0035295)	420	3.78e-20
positive regulation of biological process (GO:0048518)	775	3.3e-19
tissue morphogenesis (GO:0048729)	371	1.4e-18
neuron development (GO:0048666)	346	4.19e-18
negative regulation of biological process (GO:0048519)	706	9.37e-18
morphogenesis of an epithelium (GO:0002009)	358	1.3e-17
imaginal disc development (GO:0007444)	340	2.22e-17
regulation of metabolic process (GO:0019222)	948	3.26e-17
negative regulation of cellular process (GO:0048523)	624	4.91e-17
regulation of macromolecule metabolic process (GO:0060255)	890	9.24e-17
positive regulation of cellular process (GO:0048522)	687	1.12e-16
regulation of gene expression (GO:0010468)	724	5.4e-16
response to stimulus (GO:0050896)	1113	1.25e-15
regulation of nitrogen compound metabolic process (GO:0051171)	820	2.87e-15
regulation of cellular metabolic process (GO:0031323)	863	4.01e-15
regulation of primary metabolic process (GO:0080090)	825	9.09e-15
tube morphogenesis (GO:0035239)	305	1.9e-14
regulation of biological quality (GO:0065008)	638	2.34e-14
cell projection organization (GO:0030030)	350	2.44e-14
cell morphogenesis (GO:0000902)	305	2.9e-14
cellular component morphogenesis (GO:0032989)	360	3.04e-14
localization (GO:0051179)	942	3.45e-14
cell morphogenesis involved in differentiation (GO:0000904)	276	3.5e-14
plasma membrane bounded cell projection organization (GO:0120036)	343	4.54e-14
regulation of RNA metabolic process (GO:0051252)	601	4.65e-14
epithelial tube morphogenesis (GO:0060562)	284	6.23e-14
locomotion (GO:0040011)	349	9.32e-14
post-embryonic development (GO:0009791)	345	1.17e-13
regulation of nucleobase-containing compound metabolic process (GO:0019219)	610	1.67e-13
post-embryonic animal organ development (GO:0048569)	277	2.34e-13
imaginal disc morphogenesis (GO:0007560)	248	4.35e-13
post-embryonic animal organ morphogenesis (GO:0048563)	248	4.43e-13
neuron projection development (GO:0031175)	261	4.95e-13
instar larval or pupal development (GO:0002165)	312	6.35e-13
instar larval or pupal morphogenesis (GO:0048707)	267	9.19e-13
cell projection morphogenesis (GO:0048858)	250	1.09e-12
post-embryonic animal morphogenesis (GO:0009886)	272	1.39e-12
cell morphogenesis involved in neuron differentiation (GO:0048667)	247	1.42e-12
sensory organ development (GO:0007423)	270	1.42e-12
regulation of multicellular organismal process (GO:0051239)	405	1.51e-12
cell part morphogenesis (GO:0032990)	253	1.7e-12
plasma membrane bounded cell projection morphogenesis (GO:0120039)	248	1.72e-12
regulation of signaling (GO:0023051)	429	1.9e-12
regulation of cell communication (GO:0010646)	429	1.93e-12
regulation of cellular biosynthetic process (GO:0031326)	621	1.99e-12
neuron projection morphogenesis (GO:0048812)	247	2.13e-12
metamorphosis (GO:0007552)	276	2.38e-12
organelle organization (GO:0006996)	765	2.96e-12
regulation of biosynthetic process (GO:0009889)	621	3.01e-12
regulation of macromolecule biosynthetic process (GO:0010556)	603	3.02e-12
taxis (GO:0042330)	218	3.11e-12
signaling (GO:0023052)	551	3.58e-12
regulation of cellular macromolecule biosynthetic process (GO:2000112)	600	3.88e-12
wing disc development (GO:0035220)	235	5.38e-12
cellular response to stimulus (GO:0051716)	666	5.48e-12
cell communication (GO:0007154)	576	6.98e-12
appendage development (GO:0048736)	216	9.97e-12
response to external stimulus (GO:0009605)	467	1.16e-11
regulation of nucleic acid-templated transcription (GO:1903506)	533	1.37e-11
regulation of transcription, DNA-templated (GO:0006355)	533	1.38e-11
imaginal disc-derived appendage development (GO:0048737)	214	1.4e-11
regulation of RNA biosynthetic process (GO:2001141)	533	1.4e-11
appendage morphogenesis (GO:0035107)	212	1.51e-11
imaginal disc-derived appendage morphogenesis (GO:0035114)	210	1.73e-11
regulation of developmental process (GO:0050793)	389	2.07e-11
axon development (GO:0061564)	204	2.18e-11
sensory system development (GO:0048880)	221	3.74e-11
visual system development (GO:0150063)	221	3.78e-11
eye development (GO:0001654)	221	3.83e-11
axonogenesis (GO:0007409)	197	5.78e-11
movement of cell or subcellular component (GO:0006928)	357	5.78e-11
regulation of response to stimulus (GO:0048583)	457	5.85e-11
regulation of multicellular organismal development (GO:2000026)	319	5.91e-11
post-embryonic appendage morphogenesis (GO:0035120)	203	6.99e-11
cell cycle (GO:0007049)	334	7.56e-11
detection of chemical stimulus (GO:0009593)	8	1.65e-10
mitotic cell cycle (GO:0000278)	240	2.32e-10
compound eye development (GO:0048749)	206	3.38e-10
chemotaxis (GO:0006935)	180	3.57e-10
regionalization (GO:0003002)	258	4.05e-10
regulation of cellular component organization (GO:0051128)	391	5.94e-10
pattern specification process (GO:0007389)	274	6.95e-10
neuron projection guidance (GO:0097485)	174	7.15e-10
regulation of transcription by RNA polymerase II (GO:0006357)	354	1.27e-09
imaginal disc-derived wing morphogenesis (GO:0007476)	174	2.19e-09
signal transduction (GO:0007165)	451	2.49e-09
wing disc morphogenesis (GO:0007472)	178	2.88e-09
regulation of localization (GO:0032879)	258	3.91e-09
regulation of signal transduction (GO:0009966)	358	4.09e-09
axon guidance (GO:0007411)	166	4.36e-09
positive regulation of metabolic process (GO:0009893)	419	5.15e-09
establishment of localization (GO:0051234)	726	5.62e-09
chromosome organization (GO:0051276)	288	8.95e-09
eye morphogenesis (GO:0048592)	171	1.26e-08
sensory organ morphogenesis (GO:0090596)	171	1.27e-08
cell cycle process (GO:0022402)	277	2.06e-08
positive regulation of macromolecule metabolic process (GO:0010604)	381	3.55e-08
compound eye morphogenesis (GO:0001745)	163	4.18e-08
regulation of cell cycle (GO:0051726)	183	4.35e-08
cytoskeleton organization (GO:0007010)	287	5.13e-08
cellular process involved in reproduction in multicellular organism (GO:0022412)	404	1.05e-07
developmental process involved in reproduction (GO:0003006)	387	1.06e-07
transport (GO:0006810)	690	1.57e-07
female gamete generation (GO:0007292)	320	1.71e-07
positive regulation of cellular metabolic process (GO:0031325)	381	1.92e-07
gamete generation (GO:0007276)	427	2.13e-07
mitotic cell cycle process (GO:1903047)	168	2.4e-07
cellular metabolic process (GO:0044237)	1488	2.54e-07
embryo development (GO:0009790)	255	3.72e-07
reproductive process (GO:0022414)	535	6.88e-07
negative regulation of biosynthetic process (GO:0009890)	230	7.89e-07
negative regulation of cellular biosynthetic process (GO:0031327)	230	7.95e-07
positive regulation of nitrogen compound metabolic process (GO:0051173)	356	7.96e-07
negative regulation of cellular macromolecule biosynthetic process (GO:2000113)	225	9.05e-07
negative regulation of macromolecule biosynthetic process (GO:0010558)	225	9.11e-07
negative regulation of gene expression (GO:0010629)	276	1.14e-06
germ cell development (GO:0007281)	338	1.43e-06
negative regulation of nucleic acid-templated transcription (GO:1903507)	196	1.47e-06
negative regulation of transcription, DNA-templated (GO:0045892)	196	1.48e-06
regulation of cell differentiation (GO:0045595)	224	1.48e-06
negative regulation of RNA biosynthetic process (GO:1902679)	196	1.5e-06
negative regulation of metabolic process (GO:0009892)	358	1.67e-06
negative regulation of RNA metabolic process (GO:0051253)	203	1.69e-06
oogenesis (GO:0048477)	284	2.02e-06
detection of chemical stimulus involved in sensory perception (GO:0050907)	5	2.97e-06
negative regulation of cellular metabolic process (GO:0031324)	307	3.1e-06
negative regulation of nitrogen compound metabolic process (GO:0051172)	284	3.33e-06
positive regulation of signaling (GO:0023056)	207	3.49e-06
positive regulation of cell communication (GO:0010647)	207	3.51e-06
negative regulation of macromolecule metabolic process (GO:0010605)	337	4.11e-06
regulation of nervous system development (GO:0051960)	190	4.23e-06
negative regulation of nucleobase-containing compound metabolic process (GO:0045934)	207	4.5e-06
synapse organization (GO:0050808)	112	4.58e-06
negative regulation of multicellular organismal process (GO:0051241)	127	4.65e-06
regulation of cell development (GO:0060284)	186	5.03e-06
multi-organism process (GO:0051704)	608	5.06e-06
cellular component assembly (GO:0022607)	442	5.23e-06
response to abiotic stimulus (GO:0009628)	213	5.95e-06
sexual reproduction (GO:0019953)	477	6.87e-06
multi-organism reproductive process (GO:0044703)	477	6.92e-06
epithelial cell differentiation (GO:0030855)	205	8.99e-06
compound eye photoreceptor cell differentiation (GO:0001751)	99	9.11e-06
regulation of transport (GO:0051049)	148	1.07e-05
rhythmic process (GO:0048511)	93	1.09e-05
photoreceptor cell differentiation (GO:0046530)	109	1.09e-05
cellular localization (GO:0051641)	424	1.18e-05
central nervous system development (GO:0007417)	149	1.19e-05
cell-cell signaling (GO:0007267)	164	1.2e-05
eye photoreceptor cell differentiation (GO:0001754)	101	1.33e-05
positive regulation of gene expression (GO:0010628)	262	1.47e-05
multicellular organismal reproductive process (GO:0048609)	471	1.57e-05
positive regulation of response to stimulus (GO:0048584)	233	1.62e-05
regulation of mitotic cell cycle (GO:0007346)	112	1.65e-05
regulation of cell population proliferation (GO:0042127)	133	1.95e-05
chromatin organization (GO:0006325)	182	2.18e-05
circadian rhythm (GO:0007623)	90	2.44e-05
negative regulation of developmental process (GO:0051093)	127	2.48e-05
positive regulation of signal transduction (GO:0009967)	187	2.6e-05
anatomical structure formation involved in morphogenesis (GO:0048646)	256	2.62e-05
respiratory system development (GO:0060541)	136	2.82e-05
negative regulation of response to stimulus (GO:0048585)	192	2.94e-05
cell surface receptor signaling pathway (GO:0007166)	179	3.1e-05
sensory perception of bitter taste (GO:0050913)	0	3.17e-05
Unclassified (UNCLASSIFIED)	699	5.46e-05
biological_process (GO:0008150)	3782	5.49e-05
establishment or maintenance of cell polarity (GO:0007163)	122	5.65e-05
negative regulation of cell communication (GO:0010648)	174	6.26e-05
regulation of cell cycle process (GO:0010564)	107	6.29e-05
negative regulation of signaling (GO:0023057)	174	6.46e-05
cell migration (GO:0016477)	147	7.37e-05
cell recognition (GO:0008037)	78	0.000105
trans-synaptic signaling (GO:0099537)	122	0.000119
response to chemical (GO:0042221)	469	0.000121
negative regulation of nervous system development (GO:0051961)	77	0.000124
open tracheal system development (GO:0007424)	128	0.000133
cell adhesion (GO:0007155)	101	0.000134
regulation of organelle organization (GO:0033043)	197	0.000134
positive regulation of biosynthetic process (GO:0009891)	253	0.000142
neuron recognition (GO:0008038)	75	0.000143
positive regulation of cellular biosynthetic process (GO:0031328)	253	0.000143
regulation of growth (GO:0040008)	157	0.000145
synaptic signaling (GO:0099536)	122	0.000166
cellular component biogenesis (GO:0044085)	483	0.000168
epithelial cell development (GO:0002064)	172	0.000173
anterograde trans-synaptic signaling (GO:0098916)	120	0.000182
chemical synaptic transmission (GO:0007268)	120	0.000183
biological adhesion (GO:0022610)	101	0.000192
response to stress (GO:0006950)	471	0.000193
regulation of cellular component biogenesis (GO:0044087)	158	0.000208
microtubule cytoskeleton organization (GO:0000226)	168	0.000216
cell division (GO:0051301)	133	0.000218
negative regulation of cell differentiation (GO:0045596)	84	0.000224
leg disc development (GO:0035218)	69	0.000225
imaginal disc pattern formation (GO:0007447)	73	0.000239
segmentation (GO:0035282)	122	0.000246
mRNA processing (GO:0006397)	138	0.000259
metabolic process (GO:0008152)	1699	0.000259
cell fate commitment (GO:0045165)	151	0.000265
establishment of localization in cell (GO:0051649)	336	0.000279
actin filament-based process (GO:0030029)	136	0.000302
regulation of trans-synaptic signaling (GO:0099177)	79	0.000303
modulation of chemical synaptic transmission (GO:0050804)	79	0.000305
sensory perception of chemical stimulus (GO:0007606)	46	0.000341
positive regulation of macromolecule biosynthetic process (GO:0010557)	234	0.00035
negative regulation of signal transduction (GO:0009968)	158	0.000354
RNA splicing, via transesterification reactions with bulged adenosine as nucleophile (GO:0000377)	115	0.000419
mRNA splicing, via spliceosome (GO:0000398)	115	0.000421
negative regulation of cell development (GO:0010721)	60	0.000422
mRNA metabolic process (GO:0016071)	163	0.000423
detection of chemical stimulus involved in sensory perception of smell (GO:0050911)	4	0.000428
mitochondrial gene expression (GO:0140053)	12	0.000434
RNA splicing, via transesterification reactions (GO:0000375)	116	0.000443
regulation of anatomical structure size (GO:0090066)	134	0.000445
positive regulation of nucleobase-containing compound metabolic process (GO:0045935)	222	0.000453
positive regulation of RNA metabolic process (GO:0051254)	218	0.000458
regulation of neurogenesis (GO:0050767)	138	0.000471
ion transport (GO:0006811)	223	0.000471
ovarian follicle cell development (GO:0030707)	155	0.000481
columnar/cuboidal epithelial cell development (GO:0002066)	155	0.000499
regulation of mRNA splicing, via spliceosome (GO:0048024)	66	0.000533
regulation of mRNA processing (GO:0050684)	71	0.000624
regulation of locomotion (GO:0040012)	71	0.000627
chromatin remodeling (GO:0006338)	67	0.000666
regulation of mRNA metabolic process (GO:1903311)	81	0.00069
learning or memory (GO:0007611)	92	0.000734
cognition (GO:0050890)	92	0.000737
organic cyclic compound metabolic process (GO:1901360)	599	0.000758
ameboidal-type cell migration (GO:0001667)	95	0.000759
morphogenesis of a polarized epithelium (GO:0001738)	68	0.000873
positive regulation of nucleic acid-templated transcription (GO:1903508)	208	0.000973
positive regulation of transcription, DNA-templated (GO:0045893)	208	0.000977
positive regulation of RNA biosynthetic process (GO:1902680)	208	0.000981
localization of cell (GO:0051674)	161	0.00102
microtubule-based process (GO:0007017)	205	0.00102
cell-cell adhesion via plasma-membrane adhesion molecules (GO:0098742)	51	0.00104
actin cytoskeleton organization (GO:0030036)	124	0.00104
columnar/cuboidal epithelial cell differentiation (GO:0002065)	159	0.00109
cellular aromatic compound metabolic process (GO:0006725)	577	0.00111
regulation of RNA splicing (GO:0043484)	69	0.00113
regulation of alternative mRNA splicing, via spliceosome (GO:0000381)	58	0.00116
behavior (GO:0007610)	248	0.00116
macromolecule localization (GO:0033036)	359	0.00116
regulation of mitotic nuclear division (GO:0007088)	50	0.0012
regulation of developmental growth (GO:0048638)	120	0.00123
cellular homeostasis (GO:0019725)	120	0.00124
RNA splicing (GO:0008380)	117	0.00126
cell-cell adhesion (GO:0098609)	65	0.00127
negative regulation of transcription by RNA polymerase II (GO:0000122)	114	0.00127
ion transmembrane transport (GO:0034220)	140	0.00127
cell motility (GO:0048870)	158	0.00127
reproduction (GO:0000003)	572	0.00127
homeostatic process (GO:0042592)	216	0.00136
negative regulation of neurogenesis (GO:0050768)	53	0.00151
regulation of cellular localization (GO:0060341)	82	0.0017
regulation of membrane potential (GO:0042391)	56	0.00186
regulation of synapse structure or activity (GO:0050803)	100	0.00197
photoreceptor cell development (GO:0042461)	63	0.00216
dendrite development (GO:0016358)	81	0.00216
establishment of planar polarity (GO:0001736)	61	0.00217
establishment of tissue polarity (GO:0007164)	61	0.00218
detection of stimulus involved in sensory perception (GO:0050906)	16	0.00226
memory (GO:0007613)	71	0.00236
adult behavior (GO:0030534)	87	0.00238
locomotory behavior (GO:0007626)	96	0.00243
establishment of ommatidial planar polarity (GO:0042067)	44	0.00245
embryonic pattern specification (GO:0009880)	105	0.00245
regulation of cell death (GO:0010941)	128	0.00252
positive regulation of transport (GO:0051050)	74	0.00263
mitotic nuclear division (GO:0140014)	67	0.00264
regulation of nuclear division (GO:0051783)	51	0.00266
wing disc pattern formation (GO:0035222)	53	0.00272
tissue migration (GO:0090130)	85	0.00276
dendrite morphogenesis (GO:0048813)	78	0.00298
leg disc morphogenesis (GO:0007478)	53	0.00301
embryonic development via the syncytial blastoderm (GO:0001700)	93	0.00335
epithelium migration (GO:0090132)	81	0.00343
response to carbon dioxide (GO:0010037)	2	0.00343
positive regulation of cellular component organization (GO:0051130)	144	0.00353
organic substance metabolic process (GO:0071704)	1542	0.00356
response to alcohol (GO:0097305)	69	0.00379
embryo development ending in birth or egg hatching (GO:0009792)	97	0.00398
chromosome segregation (GO:0007059)	94	0.00404
eye-antennal disc development (GO:0035214)	46	0.00412
heterocycle metabolic process (GO:0046483)	552	0.00412
imaginal disc-derived wing vein morphogenesis (GO:0008586)	34	0.00415
epithelial cell migration (GO:0010631)	80	0.00424
muscle structure development (GO:0061061)	111	0.00424
transmembrane transport (GO:0055085)	261	0.00435
brain development (GO:0007420)	68	0.00479
regulation of chromosome organization (GO:0033044)	87	0.00479
blastoderm segmentation (GO:0007350)	96	0.00484
nucleobase-containing compound metabolic process (GO:0006139)	523	0.00484
sensory perception of taste (GO:0050909)	7	0.00486
regulation of cell motility (GO:2000145)	51	0.00506
regulation of neuroblast proliferation (GO:1902692)	39	0.00526
regulation of cell migration (GO:0030334)	49	0.00538
regulation of mitotic cell cycle phase transition (GO:1901990)	59	0.00551
embryonic morphogenesis (GO:0048598)	118	0.00551
head development (GO:0060322)	77	0.00552
primary metabolic process (GO:0044238)	1421	0.00574
negative regulation of cellular component organization (GO:0051129)	86	0.00584
immune system process (GO:0002376)	149	0.00593
organic cyclic compound biosynthetic process (GO:1901362)	211	0.00612
regulation of protein localization (GO:0032880)	62	0.00622
gland development (GO:0048732)	91	0.00709
cation transport (GO:0006812)	144	0.00723
nuclear chromosome segregation (GO:0098813)	85	0.00725
protein localization (GO:0008104)	292	0.00728
regulation of cell cycle phase transition (GO:1901987)	60	0.00729
positive regulation of transcription by RNA polymerase II (GO:0045944)	157	0.00751
regulation of cellular component movement (GO:0051270)	66	0.00763
imaginal disc-derived wing margin morphogenesis (GO:0008587)	38	0.0077
mitotic sister chromatid segregation (GO:0000070)	53	0.00802
regulation of stem cell proliferation (GO:0072091)	42	0.00815
response to radiation (GO:0009314)	89	0.00816
cation transmembrane transport (GO:0098655)	99	0.00822
imaginal disc-derived leg morphogenesis (GO:0007480)	49	0.00844
eye photoreceptor cell development (GO:0042462)	51	0.00862
nuclear division (GO:0000280)	128	0.00867
larval development (GO:0002164)	84	0.0088
compound eye photoreceptor development (GO:0042051)	49	0.0093
cellular nitrogen compound metabolic process (GO:0034641)	667	0.00981
sister chromatid segregation (GO:0000819)	60	0.0101
positive regulation of cell population proliferation (GO:0008284)	52	0.0102
regulation of cellular protein localization (GO:1903827)	39	0.0112
mitochondrial translation (GO:0032543)	12	0.0112
organic substance biosynthetic process (GO:1901576)	507	0.0113
multicellular organism reproduction (GO:0032504)	510	0.0118
developmental maturation (GO:0021700)	94	0.0122
cellular macromolecule metabolic process (GO:0044260)	819	0.0127
regulation of synapse organization (GO:0050807)	81	0.0128
long-term memory (GO:0007616)	46	0.013
dorsal/ventral pattern formation (GO:0009953)	79	0.0137
regulation of cellular component size (GO:0032535)	92	0.0137
positive regulation of cellular protein metabolic process (GO:0032270)	128	0.0141
muscle organ development (GO:0007517)	52	0.0144
aromatic compound biosynthetic process (GO:0019438)	191	0.0145
microtubule cytoskeleton organization involved in mitosis (GO:1902850)	55	0.0166
digestive system development (GO:0055123)	60	0.0166
digestive tract development (GO:0048565)	60	0.0166
regulation of gene expression, epigenetic (GO:0040029)	81	0.0166
centrosome cycle (GO:0007098)	45	0.0167
mitotic cytokinesis (GO:0000281)	45	0.0168
regulation of canonical Wnt signaling pathway (GO:0060828)	48	0.017
microtubule organizing center organization (GO:0031023)	48	0.0171
negative regulation of cell cycle process (GO:0010948)	43	0.018
negative regulation of growth (GO:0045926)	58	0.0182
protein-DNA complex subunit organization (GO:0071824)	67	0.0182
positive regulation of protein metabolic process (GO:0051247)	133	0.0182
nucleic acid metabolic process (GO:0090304)	420	0.0184
homophilic cell adhesion via plasma membrane adhesion molecules (GO:0007156)	33	0.0185
asymmetric cell division (GO:0008356)	59	0.0185
organic substance transport (GO:0071702)	291	0.0185
growth (GO:0040007)	92	0.0188
developmental growth (GO:0048589)	92	0.0188
regulation of neural precursor cell proliferation (GO:2000177)	41	0.019
positive regulation of multicellular organismal process (GO:0051240)	126	0.0192
gene silencing (GO:0016458)	73	0.0195
regulation of ion transport (GO:0043269)	35	0.0198
regulation of cytoskeleton organization (GO:0051493)	83	0.0198
cell maturation (GO:0048469)	83	0.0198
mitochondrial RNA metabolic process (GO:0000959)	0	0.0198
regulation of Wnt signaling pathway (GO:0030111)	54	0.0202
heterocycle biosynthetic process (GO:0018130)	192	0.0203
negative regulation of cell cycle (GO:0045786)	62	0.0204
regulation of protein metabolic process (GO:0051246)	247	0.0204
biosynthetic process (GO:0009058)	519	0.0205
pigmentation (GO:0043473)	47	0.0212
epidermis development (GO:0008544)	40	0.0221
protein-containing complex subunit organization (GO:0043933)	233	0.0221
negative regulation of developmental growth (GO:0048640)	50	0.023
regulation of programmed cell death (GO:0043067)	106	0.0232
response to light stimulus (GO:0009416)	72	0.0236
formation of anatomical boundary (GO:0048859)	32	0.0243
pigment metabolic process (GO:0042440)	61	0.0255
peripheral nervous system development (GO:0007422)	38	0.026
nucleobase-containing compound biosynthetic process (GO:0034654)	164	0.0262
positive regulation of locomotion (GO:0040017)	43	0.0269
regulation of sister chromatid segregation (GO:0033045)	30	0.0275
inorganic cation transmembrane transport (GO:0098662)	87	0.0279
aging (GO:0007568)	87	0.028
cellular macromolecule localization (GO:0070727)	255	0.0281
supramolecular fiber organization (GO:0097435)	91	0.0286
detection of light stimulus (GO:0009583)	37	0.0287
phototransduction (GO:0007602)	34	0.0288
positive regulation of cell differentiation (GO:0045597)	81	0.0288
phosphorus metabolic process (GO:0006793)	353	0.0288
reproductive system development (GO:0061458)	49	0.0289
reproductive structure development (GO:0048608)	49	0.0289
regulation of anatomical structure morphogenesis (GO:0022603)	119	0.03
cellular response to chemical stimulus (GO:0070887)	155	0.0308
cell population proliferation (GO:0008283)	85	0.0309
Toll signaling pathway (GO:0008063)	33	0.031
regulation of molecular function (GO:0065009)	180	0.031
organelle fission (GO:0048285)	128	0.0311
digestive tract morphogenesis (GO:0048546)	42	0.0315
developmental pigmentation (GO:0048066)	42	0.0316
regulation of multi-organism process (GO:0043900)	112	0.0317
regulation of chromosome segregation (GO:0051983)	31	0.0318
regulation of neuromuscular synaptic transmission (GO:1900073)	21	0.0322
regulation of intracellular signal transduction (GO:1902531)	147	0.0328
negative regulation of cell population proliferation (GO:0008285)	50	0.033
synaptic target recognition (GO:0008039)	33	0.0332
sex differentiation (GO:0007548)	55	0.0337
cellular biosynthetic process (GO:0044249)	487	0.0338
regulation of neuromuscular junction development (GO:1904396)	61	0.0341
positive regulation of cellular protein localization (GO:1903829)	23	0.0343
organelle localization (GO:0051640)	102	0.0344
positive regulation of cell motility (GO:2000147)	35	0.0346
nitrogen compound transport (GO:0071705)	247	0.0346
positive regulation of cell development (GO:0010720)	77	0.0349
regulation of mitotic sister chromatid segregation (GO:0033047)	27	0.0355
inorganic ion transmembrane transport (GO:0098660)	95	0.0357
response to hypoxia (GO:0001666)	38	0.0359
actin filament organization (GO:0007015)	59	0.0359
establishment of organelle localization (GO:0051656)	74	0.0359
positive regulation of cell migration (GO:0030335)	33	0.0363
cellular protein localization (GO:0034613)	232	0.0371
import into cell (GO:0098657)	81	0.0372
vesicle-mediated transport in synapse (GO:0099003)	59	0.0373
synaptic vesicle cycle (GO:0099504)	59	0.0374
phosphate-containing compound metabolic process (GO:0006796)	344	0.0379
dorsal/ventral pattern formation, imaginal disc (GO:0007450)	36	0.038
potassium ion transport (GO:0006813)	32	0.04
nitrogen compound metabolic process (GO:0006807)	1315	0.0413
regulation of protein complex assembly (GO:0043254)	57	0.0414
cytokinesis (GO:0000910)	60	0.0414
regulation of cellular protein metabolic process (GO:0032268)	233	0.0427
multicellular organism aging (GO:0010259)	83	0.0428
phosphorylation (GO:0016310)	187	0.044
chemical homeostasis (GO:0048878)	119	0.0441
regulation of synapse assembly (GO:0051963)	61	0.0442
anterior/posterior pattern specification (GO:0009952)	84	0.0443
cellular response to stress (GO:0033554)	223	0.0445
positive regulation of developmental process (GO:0051094)	120	0.0453
heart development (GO:0007507)	55	0.0458
regulation of neurotransmitter levels (GO:0001505)	71	0.0466
sensory perception of mechanical stimulus (GO:0050954)	45	0.0494
animal organ formation (GO:0048645)	30	0.0495
behavioral response to ethanol (GO:0048149)	35	0.0495

## Sheet: Table S3
Table S3: Gene Ontology analysis for upregulated significant differentially expressed genes between 21 and 40 h APF
Biological Process	Number of differentially expressed genes	p-value
nucleic acid metabolic process (GO:0090304)	46	2.53e-26
localization (GO:0051179)	584	1.09e-25
transport (GO:0006810)	479	1.41e-25
establishment of localization (GO:0051234)	489	2.65e-25
regulation of biological quality (GO:0065008)	402	4.06e-23
RNA metabolic process (GO:0016070)	38	6.45e-19
cell communication (GO:0007154)	356	8.72e-18
gene expression (GO:0010467)	68	9.32e-18
ion transport (GO:0006811)	185	1.27e-17
signaling (GO:0023052)	339	1.74e-17
RNA processing (GO:0006396)	15	6.51e-17
transmembrane transport (GO:0055085)	212	1.45e-16
ion transmembrane transport (GO:0034220)	124	4.61e-15
macromolecule metabolic process (GO:0043170)	362	1.42e-14
trans-synaptic signaling (GO:0099537)	104	3.91e-14
anterograde trans-synaptic signaling (GO:0098916)	103	5.02e-14
chemical synaptic transmission (GO:0007268)	103	5.33e-14
synaptic signaling (GO:0099536)	104	7.08e-14
system development (GO:0048731)	428	7.4e-14
cation transport (GO:0006812)	126	1.49e-13
nucleobase-containing compound metabolic process (GO:0006139)	110	2.76e-13
multicellular organism development (GO:0007275)	534	5.18e-12
neuron development (GO:0048666)	182	9.6e-12
nervous system development (GO:0007399)	289	2.94e-11
cation transmembrane transport (GO:0098655)	89	3.01e-11
neuron differentiation (GO:0030182)	207	5.66e-11
multicellular organismal process (GO:0032501)	741	7.18e-11
cell-cell signaling (GO:0007267)	116	8.94e-11
biological regulation (GO:0065007)	888	1.01e-10
synapse organization (GO:0050808)	82	1.63e-10
anatomical structure development (GO:0048856)	590	1.79e-10
taxis (GO:0042330)	125	1.81e-10
cell morphogenesis (GO:0000902)	165	2.06e-10
inorganic ion transmembrane transport (GO:0098660)	87	2.09e-10
cellular process (GO:0009987)	1291	2.28e-10
developmental process (GO:0032502)	600	2.37e-10
neurogenesis (GO:0022008)	249	2.42e-10
heterocycle metabolic process (GO:0046483)	132	2.44e-10
response to stimulus (GO:0050896)	577	3.22e-10
inorganic cation transmembrane transport (GO:0098662)	80	3.23e-10
vesicle-mediated transport (GO:0016192)	151	4.92e-10
signal transduction (GO:0007165)	259	6.3e-10
generation of neurons (GO:0048699)	238	6.97e-10
cellular nitrogen compound metabolic process (GO:0034641)	182	1.39e-09
locomotion (GO:0040011)	186	1.58e-09
cellular aromatic compound metabolic process (GO:0006725)	143	2.84e-09
anatomical structure morphogenesis (GO:0009653)	360	2.86e-09
regulation of membrane potential (GO:0042391)	50	3.94e-09
regulation of transport (GO:0051049)	100	5.03e-09
mRNA metabolic process (GO:0016071)	12	9.12e-09
cell morphogenesis involved in differentiation (GO:0000904)	143	9.15e-09
cellular component morphogenesis (GO:0032989)	186	9.75e-09
regulation of nucleobase-containing compound metabolic process (GO:0019219)	122	1.1e-08
regulation of gene expression (GO:0010468)	155	1.33e-08
neuron projection development (GO:0031175)	137	1.74e-08
response to external stimulus (GO:0009605)	249	1.74e-08
axon development (GO:0061564)	112	1.76e-08
regulation of localization (GO:0032879)	147	2.46e-08
DNA metabolic process (GO:0006259)	8	2.66e-08
regulation of RNA metabolic process (GO:0051252)	120	3.02e-08
chromosome organization (GO:0051276)	36	3.84e-08
cell part morphogenesis (GO:0032990)	133	4.44e-08
regulation of trans-synaptic signaling (GO:0099177)	60	5.44e-08
ncRNA processing (GO:0034470)	7	5.45e-08
modulation of chemical synaptic transmission (GO:0050804)	60	5.53e-08
cell projection morphogenesis (GO:0048858)	130	6.19e-08
cellular homeostasis (GO:0019725)	87	6.49e-08
mRNA processing (GO:0006397)	8	6.91e-08
axonogenesis (GO:0007409)	107	6.97e-08
regulation of nucleic acid-templated transcription (GO:1903506)	106	8.58e-08
regulation of transcription, DNA-templated (GO:0006355)	106	8.7e-08
regulation of RNA biosynthetic process (GO:2001141)	106	8.83e-08
cellular localization (GO:0051641)	249	9.76e-08
vesicle-mediated transport in synapse (GO:0099003)	54	1.09e-07
synaptic vesicle cycle (GO:0099504)	54	1.1e-07
plasma membrane bounded cell projection morphogenesis (GO:0120039)	128	1.12e-07
ncRNA metabolic process (GO:0034660)	13	1.16e-07
organic cyclic compound metabolic process (GO:1901360)	159	1.19e-07
homeostatic process (GO:0042592)	143	1.45e-07
cell morphogenesis involved in neuron differentiation (GO:0048667)	126	1.94e-07
neuron projection morphogenesis (GO:0048812)	127	2.04e-07
axon guidance (GO:0007411)	93	2.07e-07
regulation of multicellular organismal process (GO:0051239)	207	2.38e-07
cell projection organization (GO:0030030)	172	3.58e-07
chemotaxis (GO:0006935)	97	3.61e-07
establishment of localization in cell (GO:0051649)	205	3.63e-07
import into cell (GO:0098657)	67	4.55e-07
neuron projection guidance (GO:0097485)	94	4.79e-07
cellular respiration (GO:0045333)	58	4.96e-07
nitrogen compound metabolic process (GO:0006807)	487	6.07e-07
phosphorus metabolic process (GO:0006793)	228	6.09e-07
ribosome biogenesis (GO:0042254)	5	6.13e-07
cellular response to stimulus (GO:0051716)	340	6.32e-07
ribonucleoprotein complex biogenesis (GO:0022613)	12	6.66e-07
regulation of cellular macromolecule biosynthetic process (GO:2000112)	132	7.05e-07
electron transport chain (GO:0022900)	47	7.65e-07
ATP metabolic process (GO:0046034)	60	7.7e-07
cellular response to DNA damage stimulus (GO:0006974)	6	7.7e-07
ATP synthesis coupled electron transport (GO:0042773)	44	7.93e-07
cell adhesion (GO:0007155)	68	8.15e-07
oxidative phosphorylation (GO:0006119)	46	8.22e-07
respiratory electron transport chain (GO:0022904)	46	8.3e-07
phosphate-containing compound metabolic process (GO:0006796)	223	8.38e-07
chemical homeostasis (GO:0048878)	90	8.42e-07
biological adhesion (GO:0022610)	68	9.48e-07
regulation of synapse structure or activity (GO:0050803)	71	9.51e-07
plasma membrane bounded cell projection organization (GO:0120036)	167	9.77e-07
RNA splicing, via transesterification reactions (GO:0000375)	6	1.01e-06
regulation of macromolecule biosynthetic process (GO:0010556)	134	1.07e-06
cellular cation homeostasis (GO:0030003)	52	1.31e-06
RNA splicing (GO:0008380)	7	1.31e-06
cellular chemical homeostasis (GO:0055082)	55	1.39e-06
cell development (GO:0048468)	308	1.43e-06
RNA splicing, via transesterification reactions with bulged adenosine as nucleophile (GO:0000377)	6	1.43e-06
mRNA splicing, via spliceosome (GO:0000398)	6	1.44e-06
mitochondrial ATP synthesis coupled electron transport (GO:0042775)	42	1.49e-06
regulation of signaling (GO:0023051)	214	1.5e-06
regulation of cell communication (GO:0010646)	214	1.51e-06
animal organ morphogenesis (GO:0009887)	191	1.65e-06
cellular developmental process (GO:0048869)	380	1.65e-06
regulation of neurotransmitter levels (GO:0001505)	58	1.73e-06
cellular ion homeostasis (GO:0006873)	52	1.74e-06
cation homeostasis (GO:0055080)	60	2.02e-06
cellular macromolecule metabolic process (GO:0044260)	266	2.2e-06
ion homeostasis (GO:0050801)	62	2.33e-06
regulation of macromolecule metabolic process (GO:0060255)	229	2.55e-06
regulation of biosynthetic process (GO:0009889)	143	2.6e-06
export from cell (GO:0140352)	67	3.14e-06
inorganic ion homeostasis (GO:0098771)	59	3.16e-06
energy derivation by oxidation of organic compounds (GO:0015980)	61	3.58e-06
regulation of cellular biosynthetic process (GO:0031326)	143	3.71e-06
animal organ development (GO:0048513)	276	4.2e-06
response to chemical (GO:0042221)	267	4.88e-06
cell differentiation (GO:0030154)	367	5.66e-06
DNA repair (GO:0006281)	4	5.79e-06
response to abiotic stimulus (GO:0009628)	122	6.49e-06
G protein-coupled receptor signaling pathway (GO:0007186)	74	6.61e-06
monovalent inorganic cation transport (GO:0015672)	62	7.69e-06
metal ion transport (GO:0030001)	68	8.49e-06
organic substance transport (GO:0071702)	183	8.78e-06
system process (GO:0003008)	166	8.88e-06
chromatin organization (GO:0006325)	21	8.99e-06
detection of light stimulus (GO:0009583)	32	9.95e-06
neurotransmitter transport (GO:0006836)	52	9.98e-06
secretion (GO:0046903)	68	1.06e-05
secretion by cell (GO:0032940)	63	1.09e-05
detection of chemical stimulus (GO:0009593)	4	1.11e-05
phototransduction (GO:0007602)	30	1.46e-05
regulation of biological process (GO:0050789)	755	1.71e-05
regulation of nitrogen compound metabolic process (GO:0051171)	213	1.81e-05
cellular component organization (GO:0016043)	541	1.86e-05
generation of precursor metabolites and energy (GO:0006091)	70	2.04e-05
phosphorylation (GO:0016310)	124	3.01e-05
cellular metal ion homeostasis (GO:0006875)	40	3.51e-05
movement of cell or subcellular component (GO:0006928)	174	4.08e-05
regulation of primary metabolic process (GO:0080090)	219	4.16e-05
rRNA metabolic process (GO:0016072)	3	4.82e-05
regulation of chromatin organization (GO:1902275)	1	4.88e-05
transcription by RNA polymerase II (GO:0006366)	1	4.91e-05
positive regulation of transport (GO:0051050)	50	5.62e-05
detection of external stimulus (GO:0009581)	35	6.13e-05
detection of abiotic stimulus (GO:0009582)	35	6.17e-05
DNA recombination (GO:0006310)	0	6.23e-05
behavior (GO:0007610)	146	6.5e-05
regulation of cellular process (GO:0050794)	697	6.62e-05
endocytosis (GO:0006897)	49	7.07e-05
potassium ion transport (GO:0006813)	27	7.1e-05
calcium ion transport (GO:0006816)	30	7.5e-05
regulation of metabolic process (GO:0019222)	262	7.64e-05
regulation of ion transport (GO:0043269)	28	8.78e-05
methylation (GO:0032259)	2	8.89e-05
rRNA processing (GO:0006364)	3	9.47e-05
nervous system process (GO:0050877)	145	0.000107
adult behavior (GO:0030534)	56	0.000111
covalent chromatin modification (GO:0016569)	7	0.000125
histone modification (GO:0016570)	7	0.000126
metal ion homeostasis (GO:0055065)	47	0.000127
cellular macromolecule biosynthetic process (GO:0034645)	78	0.000129
exocytosis (GO:0006887)	39	0.00014
signal release (GO:0023061)	41	0.000144
neuron recognition (GO:0008038)	45	0.000144
positive regulation of nucleic acid-templated transcription (GO:1903508)	36	0.000145
regulation of synapse organization (GO:0050807)	55	0.000146
positive regulation of transcription, DNA-templated (GO:0045893)	36	0.000146
positive regulation of RNA biosynthetic process (GO:1902680)	36	0.000147
signal release from synapse (GO:0099643)	38	0.000149
neurotransmitter secretion (GO:0007269)	38	0.00015
response to light stimulus (GO:0009416)	51	0.000176
macromolecule methylation (GO:0043414)	2	0.000176
cellular calcium ion homeostasis (GO:0006874)	28	0.000182
regulated exocytosis (GO:0045055)	31	0.000187
cell recognition (GO:0008037)	46	0.000195
learning or memory (GO:0007611)	56	0.000196
cognition (GO:0050890)	56	0.000197
calcium ion homeostasis (GO:0055074)	29	0.000207
regulation of vesicle-mediated transport (GO:0060627)	46	0.000211
positive regulation of RNA metabolic process (GO:0051254)	39	0.00022
DNA conformation change (GO:0071103)	3	0.000278
intracellular signal transduction (GO:0035556)	104	0.000306
cellular lipid metabolic process (GO:0044255)	107	0.00031
potassium ion transmembrane transport (GO:0071805)	24	0.000321
lipid metabolic process (GO:0006629)	126	0.000334
regulation of neuromuscular synaptic transmission (GO:1900073)	18	0.000354
mitochondrial electron transport, NADH to ubiquinone (GO:0006120)	22	0.000355
positive regulation of nucleobase-containing compound metabolic process (GO:0045935)	41	0.000364
regulation of secretion (GO:0051046)	36	0.000367
regulation of multicellular organismal development (GO:2000026)	149	0.000369
cell-cell adhesion (GO:0098609)	41	0.000382
nitrogen compound transport (GO:0071705)	150	0.000406
regulation of transcription by RNA polymerase II (GO:0006357)	70	0.000414
regulation of developmental process (GO:0050793)	181	0.000424
calcium ion transmembrane transport (GO:0070588)	21	0.000491
cell-cell adhesion via plasma-membrane adhesion molecules (GO:0098742)	32	0.000501
regulation of cellular metabolic process (GO:0031323)	242	0.000505
anion transport (GO:0006820)	61	0.000511
protein-DNA complex subunit organization (GO:0071824)	3	0.000517
synaptic vesicle recycling (GO:0036465)	24	0.000529
cellular divalent inorganic cation homeostasis (GO:0072503)	29	0.000529
tissue morphogenesis (GO:0048729)	151	0.000569
double-strand break repair (GO:0006302)	1	0.000625
locomotory behavior (GO:0007626)	58	0.000655
membrane organization (GO:0061024)	68	0.000655
proton transmembrane transport (GO:1902600)	32	0.00068
regulation of secretion by cell (GO:1903530)	34	0.000711
cytoplasmic translation (GO:0002181)	3	0.000723
second-messenger-mediated signaling (GO:0019932)	39	0.000725
negative regulation of gene expression (GO:0010629)	53	0.000727
memory (GO:0007613)	44	0.000742
actin filament-based process (GO:0030029)	76	0.000847
primary metabolic process (GO:0044238)	561	0.000931
divalent inorganic cation homeostasis (GO:0072507)	30	0.000978
DNA packaging (GO:0006323)	2	0.00104
synaptic vesicle exocytosis (GO:0016079)	27	0.00105
cellular component organization or biogenesis (GO:0071840)	546	0.00118
regulation of system process (GO:0044057)	29	0.00121
detection of visible light (GO:0009584)	18	0.0013
oxidation-reduction process (GO:0055114)	142	0.00135
presynaptic endocytosis (GO:0140238)	21	0.00146
synaptic vesicle endocytosis (GO:0048488)	21	0.00146
cytosolic transport (GO:0016482)	26	0.00147
neuromuscular synaptic transmission (GO:0007274)	26	0.00148
small molecule metabolic process (GO:0044281)	181	0.00165
tissue development (GO:0009888)	232	0.00165
RNA biosynthetic process (GO:0032774)	10	0.00171
organic anion transport (GO:0015711)	48	0.00182
developmental pigmentation (GO:0048066)	29	0.00186
regulation of neuromuscular junction development (GO:1904396)	41	0.00192
regulation of synapse assembly (GO:0051963)	41	0.00204
regulation of behavior (GO:0050795)	36	0.00207
intracellular transport (GO:0046907)	152	0.0021
response to radiation (GO:0009314)	54	0.00212
divalent inorganic cation transport (GO:0072511)	31	0.00216
eye photoreceptor cell development (GO:0042462)	33	0.00216
divalent metal ion transport (GO:0070838)	31	0.00217
positive regulation of macromolecule biosynthetic process (GO:0010557)	48	0.00217
sleep (GO:0030431)	23	0.00221
transcription, DNA-templated (GO:0006351)	10	0.00222
nucleic acid-templated transcription (GO:0097659)	10	0.00223
pigmentation (GO:0043473)	31	0.00245
macromolecule localization (GO:0033036)	194	0.00245
translation (GO:0006412)	24	0.00275
regulation of metal ion transport (GO:0010959)	19	0.0028
actin cytoskeleton organization (GO:0030036)	69	0.00288
organophosphate metabolic process (GO:0019637)	101	0.00293
photoreceptor cell development (GO:0042461)	37	0.0033
G protein-coupled receptor signaling pathway, coupled to cyclic nucleotide second messenger (GO:0007187)	26	0.00336
phototransduction, visible light (GO:0007603)	15	0.00337
tube development (GO:0035295)	164	0.00346
morphogenesis of an epithelium (GO:0002009)	142	0.00348
negative regulation of macromolecule metabolic process (GO:0010605)	79	0.00368
double-strand break repair via homologous recombination (GO:0000724)	0	0.00413
presynaptic active zone organization (GO:1990709)	12	0.00414
compound eye photoreceptor development (GO:0042051)	31	0.00415
recombinational repair (GO:0000725)	0	0.00415
macromolecule biosynthetic process (GO:0009059)	90	0.00419
regulation of endocytosis (GO:0030100)	25	0.00432
regulation of G protein-coupled receptor signaling pathway (GO:0008277)	16	0.0044
regulation of synaptic growth at neuromuscular junction (GO:0008582)	38	0.0047
motor neuron axon guidance (GO:0008045)	29	0.00471
positive regulation of transcription by RNA polymerase II (GO:0045944)	29	0.00573
detection of chemical stimulus involved in sensory perception (GO:0050907)	3	0.00581
protein localization to endoplasmic reticulum (GO:0070972)	16	0.00588
eye pigmentation (GO:0048069)	21	0.00588
regulation of growth (GO:0040008)	81	0.00588
neuromuscular junction development (GO:0007528)	31	0.0066
tube morphogenesis (GO:0035239)	123	0.00682
vesicle organization (GO:0016050)	33	0.00688
response to drug (GO:0042493)	65	0.00763
nucleosome organization (GO:0034728)	1	0.0082
rhodopsin mediated signaling pathway (GO:0016056)	11	0.00825
regulation of circadian sleep/wake cycle (GO:0042749)	20	0.00845
wing disc development (GO:0035220)	97	0.00872
peptidyl-lysine modification (GO:0018205)	7	0.00872
deactivation of rhodopsin mediated signaling (GO:0016059)	12	0.00874
protein targeting to ER (GO:0045047)	13	0.00884
maintenance of presynaptic active zone structure (GO:0048790)	9	0.00889
maintenance of synapse structure (GO:0099558)	9	0.00892
ribosomal large subunit biogenesis (GO:0042273)	0	0.00893
nuclear chromosome segregation (GO:0098813)	9	0.00896
response to ethanol (GO:0045471)	27	0.00899
transcription initiation from RNA polymerase II promoter (GO:0006367)	0	0.009
epithelium development (GO:0060429)	208	0.00905
protein localization (GO:0008104)	159	0.00906
regulation of locomotion (GO:0040012)	38	0.00908
regulation of chromosome organization (GO:0033044)	9	0.0091
organic acid transport (GO:0015849)	34	0.00934
cellular protein localization (GO:0034613)	132	0.00934
protein metabolic process (GO:0019538)	291	0.00949
regulation of developmental growth (GO:0048638)	64	0.00964
neuron cellular homeostasis (GO:0070050)	16	0.00965
ribose phosphate metabolic process (GO:0019693)	48	0.00966
instar larval or pupal development (GO:0002165)	129	0.00992
lipid biosynthetic process (GO:0008610)	60	0.00998
regulation of cytosolic calcium ion concentration (GO:0051480)	15	0.0104
photoreceptor cell axon guidance (GO:0072499)	15	0.0104
anion transmembrane transport (GO:0098656)	33	0.0109
receptor-mediated endocytosis (GO:0006898)	17	0.0111
negative regulation of synaptic transmission (GO:0050805)	13	0.0113
establishment of protein localization to endoplasmic reticulum (GO:0072599)	13	0.0113
eye pigment metabolic process (GO:0042441)	19	0.0113
pigment metabolic process involved in pigmentation (GO:0043474)	19	0.0113
ribonucleotide metabolic process (GO:0009259)	47	0.0113
organelle fission (GO:0048285)	23	0.0113
regulation of rhodopsin mediated signaling pathway (GO:0022400)	12	0.0114
pigment metabolic process involved in developmental pigmentation (GO:0043324)	19	0.0114
behavioral response to ethanol (GO:0048149)	23	0.0114
adenylate cyclase-modulating G protein-coupled receptor signaling pathway (GO:0007188)	23	0.0114
purine ribonucleotide metabolic process (GO:0009150)	45	0.0118
negative regulation of nucleobase-containing compound metabolic process (GO:0045934)	38	0.0119
peptide biosynthetic process (GO:0043043)	27	0.0121
regulation of cellular component biogenesis (GO:0044087)	80	0.0125
negative regulation of metabolic process (GO:0009892)	89	0.0127
monovalent inorganic cation homeostasis (GO:0055067)	19	0.0128
carboxylic acid transport (GO:0046942)	33	0.0131
pigment biosynthetic process (GO:0046148)	25	0.0132
positive regulation of biosynthetic process (GO:0009891)	58	0.0132
positive regulation of cellular biosynthetic process (GO:0031328)	58	0.0133
neuron projection extension (GO:1990138)	18	0.0142
tRNA metabolic process (GO:0006399)	7	0.0144
positive regulation of synaptic transmission (GO:0050806)	13	0.0146
anesthesia-resistant memory (GO:0007615)	10	0.0147
regulation of ion transmembrane transport (GO:0034765)	13	0.0147
regulation of transmembrane transport (GO:0034762)	13	0.0147
adult locomotory behavior (GO:0008344)	30	0.0147
SRP-dependent cotranslational protein targeting to membrane (GO:0006614)	10	0.0148
cotranslational protein targeting to membrane (GO:0006613)	10	0.0148
homophilic cell adhesion via plasma membrane adhesion molecules (GO:0007156)	20	0.0148
imaginal disc-derived wing morphogenesis (GO:0007476)	73	0.0148
regulation of ion transmembrane transporter activity (GO:0032412)	12	0.0151
regulation of transporter activity (GO:0032409)	12	0.0151
regulation of transmembrane transporter activity (GO:0022898)	12	0.0152
ribosomal small subunit biogenesis (GO:0042274)	1	0.0152
sister chromatid segregation (GO:0000819)	4	0.0155
cell cycle (GO:0007049)	70	0.0163
protein folding (GO:0006457)	40	0.0164
post-embryonic development (GO:0009791)	140	0.0169
imaginal disc development (GO:0007444)	129	0.0171
positive regulation of endocytosis (GO:0045807)	18	0.0176
pigment metabolic process (GO:0042440)	36	0.0176
positive regulation of chromatin organization (GO:1905269)	0	0.0176
regulation of response to stimulus (GO:0048583)	201	0.0177
sensory perception of bitter taste (GO:0050913)	0	0.0182
regulation of chromatin silencing (GO:0031935)	0	0.0183
multicellular organism aging (GO:0010259)	49	0.0185
purine nucleotide metabolic process (GO:0006163)	45	0.0186
organic substance metabolic process (GO:0071704)	636	0.0186
ribonucleoprotein complex subunit organization (GO:0071826)	9	0.0186
ribonucleoprotein complex assembly (GO:0022618)	8	0.0186
positive regulation of gene expression (GO:0010628)	59	0.0188
axon extension (GO:0048675)	17	0.0195
cell cycle process (GO:0022402)	57	0.0196
post-embryonic animal morphogenesis (GO:0009886)	109	0.0199
cellular macromolecule localization (GO:0070727)	140	0.0199
stabilization of membrane potential (GO:0030322)	10	0.0203
rhodopsin metabolic process (GO:0046154)	11	0.0204
ribonucleotide biosynthetic process (GO:0009260)	29	0.0205
instar larval or pupal morphogenesis (GO:0048707)	106	0.0207
cyclic-nucleotide-mediated signaling (GO:0019935)	24	0.021
aging (GO:0007568)	50	0.0212
cytoskeleton organization (GO:0007010)	129	0.0212
cellular monovalent inorganic cation homeostasis (GO:0030004)	17	0.0213
epithelial tube morphogenesis (GO:0060562)	111	0.0216
negative regulation of transcription, DNA-templated (GO:0045892)	35	0.0216
negative regulation of nucleic acid-templated transcription (GO:1903507)	35	0.0216
negative regulation of RNA biosynthetic process (GO:1902679)	35	0.0217
chromosome segregation (GO:0007059)	12	0.0217
peptide transport (GO:0015833)	111	0.0219
mitotic nuclear division (GO:0140014)	5	0.0224
phospholipid metabolic process (GO:0006644)	46	0.0225
amide transport (GO:0042886)	112	0.0229
sulfur compound metabolic process (GO:0006790)	46	0.0236
response to temperature stimulus (GO:0009266)	42	0.0239
nuclear division (GO:0000280)	23	0.0242
regulation of nervous system development (GO:0051960)	88	0.0243
regulation of signal transduction (GO:0009966)	159	0.0243
mitotic sister chromatid segregation (GO:0000070)	3	0.0243
tRNA processing (GO:0008033)	3	0.0243
RNA methylation (GO:0001510)	0	0.0243
negative regulation of chromosome organization (GO:2001251)	0	0.0244
regulation of histone modification (GO:0031056)	0	0.0244
regulation of cation transmembrane transport (GO:1904062)	12	0.0252
regulation of nervous system process (GO:0031644)	12	0.0253
imaginal disc morphogenesis (GO:0007560)	96	0.0256
post-embryonic animal organ morphogenesis (GO:0048563)	96	0.0257
rhabdomere development (GO:0042052)	18	0.0263
long-term memory (GO:0007616)	26	0.0263
cellular response to light stimulus (GO:0071482)	18	0.0264
eye pigment biosynthetic process (GO:0006726)	17	0.0269
negative regulation of RNA metabolic process (GO:0051253)	38	0.0273
protein alkylation (GO:0008213)	2	0.0273
protein methylation (GO:0006479)	2	0.0274
aerobic respiration (GO:0009060)	25	0.0275
histone acetylation (GO:0016573)	2	0.0275
protein-DNA complex assembly (GO:0065004)	2	0.0275
proteolysis (GO:0006508)	101	0.0276
RNA modification (GO:0009451)	4	0.0276
carbohydrate derivative metabolic process (GO:1901135)	128	0.0277
purine ribonucleotide biosynthetic process (GO:0009152)	27	0.0288
regulation of exocytosis (GO:0017157)	13	0.0295
sensory perception of mechanical stimulus (GO:0050954)	27	0.0305
metamorphosis (GO:0007552)	110	0.0306
ribose phosphate biosynthetic process (GO:0046390)	29	0.0311
chaperone-mediated protein folding (GO:0061077)	19	0.0315
wing disc morphogenesis (GO:0007472)	73	0.0315
lipid modification (GO:0030258)	33	0.032
regulation of circadian sleep/wake cycle, sleep (GO:0045187)	16	0.0325
muscle organ development (GO:0007517)	29	0.0327
developmental growth (GO:0048589)	51	0.0327
growth (GO:0040007)	51	0.0328
protein acetylation (GO:0006473)	3	0.0332
supramolecular fiber organization (GO:0097435)	51	0.0338
developmental cell growth (GO:0048588)	22	0.0339
clathrin-dependent endocytosis (GO:0072583)	11	0.0343
regulation of circadian rhythm (GO:0042752)	29	0.0346
purine nucleotide biosynthetic process (GO:0006164)	27	0.0347
regulation of cellular component organization (GO:0051128)	170	0.0348
synaptic vesicle endosomal processing (GO:0099532)	9	0.0362
regulation of cation channel activity (GO:2001257)	9	0.0363
determination of adult lifespan (GO:0008340)	47	0.0364
regulation of neurotransmitter transport (GO:0051588)	13	0.0365
regulation of synaptic plasticity (GO:0048167)	16	0.0365
response to oxidative stress (GO:0006979)	40	0.0365
regulation of neurotransmitter secretion (GO:0046928)	13	0.0366
regulation of anatomical structure size (GO:0090066)	66	0.0377
detection of chemical stimulus involved in sensory perception of smell (GO:0050911)	2	0.0381
nucleotide metabolic process (GO:0009117)	52	0.0394
glycerolipid metabolic process (GO:0046486)	42	0.0395
actin filament organization (GO:0007015)	34	0.0399
protein localization to membrane (GO:0072657)	38	0.0399
establishment of protein localization (GO:0045184)	111	0.0399
'de novo' protein folding (GO:0006458)	15	0.0402
protein transport (GO:0015031)	108	0.0404
nucleoside phosphate metabolic process (GO:0006753)	53	0.0416
cellular protein metabolic process (GO:0044267)	224	0.0426
response to antibiotic (GO:0046677)	28	0.0427
mitotic cell cycle process (GO:1903047)	27	0.0436
response to toxic substance (GO:0009636)	43	0.0439
positive regulation of cellular component organization (GO:0051130)	74	0.0439
adrenergic receptor signaling pathway (GO:0071875)	7	0.0449
adenylate cyclase-activating adrenergic receptor signaling pathway (GO:0071880)	7	0.045
'de novo' posttranslational protein folding (GO:0051084)	13	0.045
chaperone cofactor-dependent protein refolding (GO:0051085)	13	0.0451
axon choice point recognition (GO:0016198)	13	0.0452
cellular response to chemical stimulus (GO:0070887)	84	0.0456
sensory perception of sound (GO:0007605)	23	0.0458
synaptic target recognition (GO:0008039)	19	0.0459
regulation of calcium ion transport (GO:0051924)	10	0.0466
mitotic cell cycle (GO:0000278)	44	0.0476
cytosolic calcium ion transport (GO:0060401)	8	0.0481
ribonucleoprotein complex localization (GO:0071166)	0	0.0481
presynaptic membrane organization (GO:0097090)	8	0.0482
postsynaptic membrane organization (GO:0001941)	9	0.0482
ribonucleoprotein complex export from nucleus (GO:0071426)	0	0.0482
protein folding in endoplasmic reticulum (GO:0034975)	8	0.0483
synaptic transmission, cholinergic (GO:0007271)	8	0.0484
nucleocytoplasmic transport (GO:0006913)	5	0.0493
nuclear transport (GO:0051169)	5	0.0494
post-embryonic appendage morphogenesis (GO:0035120)	79	0.0495
regulation of receptor-mediated endocytosis (GO:0048259)	12	0.0496
organelle membrane fusion (GO:0090174)	18	0.0496
anatomical structure homeostasis (GO:0060249)	44	0.0496

## Sheet: Table S4
Table S4: Gene Ontology analysis for downregulated significant differentially expressed genes between 21 and 40 h APF
Biological Process	Number of differentially expressed genes	p-value
regulation of biological process (GO:0050789)	1035	3.71e-66
regulation of gene expression (GO:0010468)	569	2.12e-65
regulation of macromolecule metabolic process (GO:0060255)	661	7.27e-65
regulation of metabolic process (GO:0019222)	686	6.75e-63
regulation of cellular process (GO:0050794)	968	7.34e-63
biological regulation (GO:0065007)	1091	3.64e-59
regulation of nitrogen compound metabolic process (GO:0051171)	607	2.7e-58
regulation of RNA metabolic process (GO:0051252)	481	1.26e-57
regulation of nucleobase-containing compound metabolic process (GO:0019219)	488	1.92e-57
regulation of primary metabolic process (GO:0080090)	606	3.02e-56
regulation of cellular metabolic process (GO:0031323)	621	8.47e-55
cellular process (GO:0009987)	1460	4.11e-53
regulation of cellular macromolecule biosynthetic process (GO:2000112)	468	3.4e-50
regulation of macromolecule biosynthetic process (GO:0010556)	469	4.72e-50
regulation of cellular biosynthetic process (GO:0031326)	478	1.06e-49
regulation of biosynthetic process (GO:0009889)	478	1.41e-49
regulation of nucleic acid-templated transcription (GO:1903506)	427	3.21e-49
regulation of transcription, DNA-templated (GO:0006355)	427	3.39e-49
regulation of RNA biosynthetic process (GO:2001141)	427	3.59e-49
developmental process (GO:0032502)	723	7.49e-39
anatomical structure development (GO:0048856)	710	1.44e-38
system development (GO:0048731)	516	2.6e-38
negative regulation of biological process (GO:0048519)	466	3.7e-38
chromosome organization (GO:0051276)	252	4.24e-37
multicellular organism development (GO:0007275)	630	4.01e-36
animal organ development (GO:0048513)	396	9.67e-36
cellular component organization or biogenesis (GO:0071840)	722	1.04e-35
nucleic acid metabolic process (GO:0090304)	374	1.71e-35
negative regulation of cellular process (GO:0048523)	413	3.13e-35
regulation of transcription by RNA polymerase II (GO:0006357)	284	9.37e-35
cellular component organization (GO:0016043)	690	1.44e-34
cell cycle (GO:0007049)	264	6.41e-34
cell differentiation (GO:0030154)	482	6.7e-31
positive regulation of biological process (GO:0048518)	470	1.96e-30
cellular developmental process (GO:0048869)	489	2.86e-30
mitotic cell cycle (GO:0000278)	196	6e-30
nucleobase-containing compound metabolic process (GO:0006139)	413	8.01e-30
anatomical structure morphogenesis (GO:0009653)	441	2.29e-29
positive regulation of cellular process (GO:0048522)	425	1.41e-28
tissue development (GO:0009888)	345	1.87e-28
cellular aromatic compound metabolic process (GO:0006725)	434	1.9e-28
macromolecule metabolic process (GO:0043170)	778	4.23e-28
epithelium development (GO:0060429)	323	5.6e-28
cell cycle process (GO:0022402)	220	2e-27
heterocycle metabolic process (GO:0046483)	420	2.01e-27
organic cyclic compound metabolic process (GO:1901360)	440	3.79e-27
negative regulation of gene expression (GO:0010629)	223	3.6e-26
cellular nitrogen compound metabolic process (GO:0034641)	485	7.09e-26
organelle organization (GO:0006996)	475	1.34e-25
tube development (GO:0035295)	256	2.52e-25
RNA metabolic process (GO:0016070)	284	2.58e-25
negative regulation of metabolic process (GO:0009892)	269	1.91e-24
negative regulation of macromolecule metabolic process (GO:0010605)	258	2.02e-24
positive regulation of metabolic process (GO:0009893)	290	1.11e-23
positive regulation of macromolecule metabolic process (GO:0010604)	272	1.25e-23
chromatin organization (GO:0006325)	161	1.58e-23
regulation of cell cycle (GO:0051726)	150	3.48e-23
gene expression (GO:0010467)	335	4.64e-23
cell development (GO:0048468)	380	7.86e-23
multicellular organismal process (GO:0032501)	786	1.01e-22
imaginal disc development (GO:0007444)	211	1.44e-22
mitotic cell cycle process (GO:1903047)	141	1.64e-22
nervous system development (GO:0007399)	325	2.97e-22
negative regulation of nucleic acid-templated transcription (GO:1903507)	161	3.4e-22
negative regulation of transcription, DNA-templated (GO:0045892)	161	3.45e-22
negative regulation of RNA biosynthetic process (GO:1902679)	161	3.5e-22
mRNA metabolic process (GO:0016071)	151	4.67e-22
negative regulation of cellular macromolecule biosynthetic process (GO:2000113)	178	6.89e-22
negative regulation of macromolecule biosynthetic process (GO:0010558)	178	6.99e-22
negative regulation of RNA metabolic process (GO:0051253)	165	8.16e-22
negative regulation of nucleobase-containing compound metabolic process (GO:0045934)	169	8.48e-22
nitrogen compound metabolic process (GO:0006807)	828	8.64e-22
cellular macromolecule metabolic process (GO:0044260)	553	1.05e-21
morphogenesis of an epithelium (GO:0002009)	216	2.1e-21
negative regulation of biosynthetic process (GO:0009890)	179	2.19e-21
negative regulation of cellular biosynthetic process (GO:0031327)	179	2.22e-21
cellular metabolic process (GO:0044237)	863	2.42e-21
tissue morphogenesis (GO:0048729)	220	2.54e-21
negative regulation of nitrogen compound metabolic process (GO:0051172)	215	2.57e-21
positive regulation of nitrogen compound metabolic process (GO:0051173)	255	3.07e-21
mRNA processing (GO:0006397)	130	3.1e-21
negative regulation of cellular metabolic process (GO:0031324)	228	3.69e-21
positive regulation of cellular metabolic process (GO:0031325)	265	7.43e-21
gamete generation (GO:0007276)	291	8.46e-21
positive regulation of gene expression (GO:0010628)	203	1.03e-20
cellular process involved in reproduction in multicellular organism (GO:0022412)	276	1.18e-20
animal organ morphogenesis (GO:0009887)	243	4.03e-20
primary metabolic process (GO:0044238)	860	8.38e-20
reproductive process (GO:0022414)	350	1.41e-19
developmental process involved in reproduction (GO:0003006)	262	1.59e-19
positive regulation of RNA metabolic process (GO:0051254)	179	2.61e-19
positive regulation of nucleobase-containing compound metabolic process (GO:0045935)	181	3.48e-19
sensory organ development (GO:0007423)	175	4e-19
RNA splicing, via transesterification reactions (GO:0000375)	110	7.04e-19
positive regulation of macromolecule biosynthetic process (GO:0010557)	186	9.97e-19
RNA splicing, via transesterification reactions with bulged adenosine as nucleophile (GO:0000377)	109	1.02e-18
mRNA splicing, via spliceosome (GO:0000398)	109	1.03e-18
positive regulation of nucleic acid-templated transcription (GO:1903508)	172	1.29e-18
positive regulation of transcription, DNA-templated (GO:0045893)	172	1.3e-18
positive regulation of RNA biosynthetic process (GO:1902680)	172	1.31e-18
positive regulation of biosynthetic process (GO:0009891)	195	2.22e-18
positive regulation of cellular biosynthetic process (GO:0031328)	195	2.24e-18
neurogenesis (GO:0022008)	273	3.45e-18
generation of neurons (GO:0048699)	264	4.88e-18
regionalization (GO:0003002)	173	5.04e-18
female gamete generation (GO:0007292)	218	8.68e-18
RNA splicing (GO:0008380)	110	8.72e-18
post-embryonic animal organ development (GO:0048569)	172	8.74e-18
organic substance metabolic process (GO:0071704)	906	1.22e-17
germ cell development (GO:0007281)	231	2.68e-17
epithelial tube morphogenesis (GO:0060562)	173	2.95e-17
pattern specification process (GO:0007389)	180	3.57e-17
tube morphogenesis (GO:0035239)	182	3.99e-17
RNA processing (GO:0006396)	185	7.04e-17
multi-organism process (GO:0051704)	383	7.76e-17
post-embryonic development (GO:0009791)	205	8.52e-17
regulation of mitotic cell cycle (GO:0007346)	96	1.38e-16
sensory system development (GO:0048880)	144	1.71e-16
visual system development (GO:0150063)	144	1.73e-16
eye development (GO:0001654)	144	1.74e-16
imaginal disc morphogenesis (GO:0007560)	152	2.58e-16
post-embryonic animal organ morphogenesis (GO:0048563)	152	2.6e-16
sexual reproduction (GO:0019953)	309	2.65e-16
multi-organism reproductive process (GO:0044703)	309	2.67e-16
appendage development (GO:0048736)	136	1.68e-15
compound eye development (GO:0048749)	135	1.74e-15
multicellular organismal reproductive process (GO:0048609)	304	1.75e-15
imaginal disc-derived appendage development (GO:0048737)	135	1.87e-15
instar larval or pupal morphogenesis (GO:0048707)	161	1.87e-15
post-embryonic animal morphogenesis (GO:0009886)	163	3.22e-15
neuron differentiation (GO:0030182)	215	3.82e-15
appendage morphogenesis (GO:0035107)	133	3.91e-15
metamorphosis (GO:0007552)	166	4.15e-15
oogenesis (GO:0048477)	192	4.96e-15
imaginal disc-derived appendage morphogenesis (GO:0035114)	132	5.11e-15
instar larval or pupal development (GO:0002165)	183	5.89e-15
regulation of cell cycle process (GO:0010564)	90	7.47e-15
metabolic process (GO:0008152)	953	1.11e-14
embryo development (GO:0009790)	168	5.66e-14
reproduction (GO:0000003)	364	1.62e-13
positive regulation of transcription by RNA polymerase II (GO:0045944)	128	2.29e-13
post-embryonic appendage morphogenesis (GO:0035120)	124	3.13e-13
cell fate commitment (GO:0045165)	116	3.34e-13
wing disc development (GO:0035220)	138	4.5e-13
cellular component biogenesis (GO:0044085)	306	5.08e-13
cellular component assembly (GO:0022607)	271	1.98e-12
chromatin remodeling (GO:0006338)	61	2.24e-12
regulation of response to stimulus (GO:0048583)	256	2.89e-12
regulation of chromosome organization (GO:0033044)	78	3.32e-12
negative regulation of transcription by RNA polymerase II (GO:0000122)	93	3.86e-12
chromosome segregation (GO:0007059)	82	4.66e-12
regulation of cell population proliferation (GO:0042127)	97	5.11e-12
mitotic nuclear division (GO:0140014)	62	7.01e-12
nuclear division (GO:0000280)	105	7.21e-12
DNA metabolic process (GO:0006259)	106	8.79e-12
nuclear chromosome segregation (GO:0098813)	76	1.03e-11
eye morphogenesis (GO:0048592)	108	1.19e-11
sensory organ morphogenesis (GO:0090596)	108	1.2e-11
compound eye morphogenesis (GO:0001745)	104	1.94e-11
regulation of cellular component organization (GO:0051128)	221	2.45e-11
protein-DNA complex subunit organization (GO:0071824)	64	3.14e-11
regulation of organelle organization (GO:0033043)	135	5.77e-11
cell division (GO:0051301)	98	5.99e-11
segmentation (GO:0035282)	91	9.33e-11
organelle fission (GO:0048285)	105	9.52e-11
regulation of mRNA splicing, via spliceosome (GO:0048024)	56	1.19e-10
histone modification (GO:0016570)	79	1.19e-10
regulation of mRNA processing (GO:0050684)	59	2.1e-10
sister chromatid segregation (GO:0000819)	56	2.11e-10
covalent chromatin modification (GO:0016569)	79	2.13e-10
wing disc morphogenesis (GO:0007472)	105	2.98e-10
plasma membrane bounded cell projection organization (GO:0120036)	176	4.39e-10
regulation of developmental process (GO:0050793)	208	5.15e-10
regulation of mRNA metabolic process (GO:1903311)	65	5.26e-10
multicellular organism reproduction (GO:0032504)	319	5.86e-10
cell projection organization (GO:0030030)	178	5.96e-10
mitotic sister chromatid segregation (GO:0000070)	50	5.98e-10
microtubule cytoskeleton organization (GO:0000226)	115	6.2e-10
regulation of mitotic cell cycle phase transition (GO:1901990)	53	6.34e-10
regulation of alternative mRNA splicing, via spliceosome (GO:0000381)	50	8.03e-10
microtubule-based process (GO:0007017)	139	8.97e-10
regulation of signal transduction (GO:0009966)	199	9.19e-10
imaginal disc-derived wing morphogenesis (GO:0007476)	101	9.58e-10
regulation of cell cycle phase transition (GO:1901987)	54	1e-09
regulation of RNA splicing (GO:0043484)	57	1.52e-09
neuron development (GO:0048666)	164	1.6e-09
anatomical structure formation involved in morphogenesis (GO:0048646)	159	1.92e-09
macromolecule biosynthetic process (GO:0009059)	215	2.18e-09
regulation of cell differentiation (GO:0045595)	135	3.06e-09
regulation of multicellular organismal development (GO:2000026)	170	3.16e-09
cellular response to DNA damage stimulus (GO:0006974)	84	3.19e-09
leg disc development (GO:0035218)	53	3.27e-09
regulation of gene expression, epigenetic (GO:0040029)	68	3.92e-09
cell surface receptor signaling pathway (GO:0007166)	115	4.13e-09
cellular macromolecule biosynthetic process (GO:0034645)	208	5.65e-09
central nervous system development (GO:0007417)	95	9.09e-09
regulation of mitotic nuclear division (GO:0007088)	42	1.12e-08
DNA conformation change (GO:0071103)	59	1.46e-08
regulation of nuclear division (GO:0051783)	43	1.96e-08
embryonic pattern specification (GO:0009880)	77	2.03e-08
gene silencing (GO:0016458)	61	2.24e-08
protein-containing complex subunit organization (GO:0043933)	157	2.75e-08
DNA repair (GO:0006281)	70	2.82e-08
regulation of signaling (GO:0023051)	215	3.22e-08
regulation of cell communication (GO:0010646)	215	3.24e-08
cellular protein metabolic process (GO:0044267)	370	3.37e-08
cytoskeleton organization (GO:0007010)	158	4.8e-08
cell morphogenesis involved in differentiation (GO:0000904)	133	5.29e-08
movement of cell or subcellular component (GO:0006928)	183	5.3e-08
rhythmic process (GO:0048511)	61	5.58e-08
response to stimulus (GO:0050896)	536	5.9e-08
cellular component morphogenesis (GO:0032989)	174	5.92e-08
negative regulation of cell cycle (GO:0045786)	53	6.11e-08
nucleobase-containing compound biosynthetic process (GO:0034654)	116	7.19e-08
cell population proliferation (GO:0008283)	68	7.5e-08
blastoderm segmentation (GO:0007350)	71	7.58e-08
RNA biosynthetic process (GO:0032774)	72	1.05e-07
epithelial cell differentiation (GO:0030855)	121	1.05e-07
negative regulation of cell cycle process (GO:0010948)	39	1.12e-07
regulation of cell development (GO:0060284)	110	1.24e-07
circadian rhythm (GO:0007623)	59	1.28e-07
positive regulation of response to stimulus (GO:0048584)	137	1.29e-07
biological_process (GO:0008150)	1897	1.36e-07
Unclassified (UNCLASSIFIED)	301	1.36e-07
DNA packaging (GO:0006323)	49	1.43e-07
cell morphogenesis involved in neuron differentiation (GO:0048667)	121	1.62e-07
peptidyl-lysine modification (GO:0018205)	59	1.63e-07
negative regulation of response to stimulus (GO:0048585)	115	1.92e-07
regulation of chromatin organization (GO:1902275)	51	1.94e-07
nuclear transport (GO:0051169)	48	2.06e-07
nucleocytoplasmic transport (GO:0006913)	48	2.06e-07
transcription, DNA-templated (GO:0006351)	70	2.29e-07
nucleic acid-templated transcription (GO:0097659)	70	2.3e-07
regulation of multicellular organismal process (GO:0051239)	198	2.53e-07
meiotic cell cycle (GO:0051321)	81	2.99e-07
cellular nitrogen compound biosynthetic process (GO:0044271)	192	3.4e-07
positive regulation of signal transduction (GO:0009967)	111	3.48e-07
neuron projection morphogenesis (GO:0048812)	120	3.66e-07
meiotic cell cycle process (GO:1903046)	78	3.87e-07
plasma membrane bounded cell projection morphogenesis (GO:0120039)	120	3.87e-07
transcription by RNA polymerase II (GO:0006366)	50	3.97e-07
immune system process (GO:0002376)	100	4.08e-07
epithelial cell development (GO:0002064)	106	4.1e-07
negative regulation of developmental process (GO:0051093)	78	4.12e-07
ovarian follicle cell development (GO:0030707)	98	4.58e-07
microtubule cytoskeleton organization involved in mitosis (GO:1902850)	45	4.97e-07
cell projection morphogenesis (GO:0048858)	120	5.56e-07
compound eye photoreceptor cell differentiation (GO:0001751)	61	5.57e-07
neuron projection development (GO:0031175)	124	5.59e-07
cellular response to stimulus (GO:0051716)	326	5.85e-07
anterior/posterior pattern specification (GO:0009952)	65	5.95e-07
negative regulation of cell differentiation (GO:0045596)	56	6.38e-07
columnar/cuboidal epithelial cell development (GO:0002066)	98	6.65e-07
photoreceptor cell differentiation (GO:0046530)	66	8.06e-07
nucleosome organization (GO:0034728)	38	8.29e-07
asymmetric cell division (GO:0008356)	47	8.39e-07
columnar/cuboidal epithelial cell differentiation (GO:0002065)	101	8.98e-07
organic cyclic compound biosynthetic process (GO:1901362)	134	9.07e-07
vesicle-mediated transport (GO:0016192)	29	1e-06
heterocycle biosynthetic process (GO:0018130)	126	1.16e-06
locomotion (GO:0040011)	163	1.18e-06
aromatic compound biosynthetic process (GO:0019438)	124	1.3e-06
eye-antennal disc development (GO:0035214)	36	1.31e-06
negative regulation of multicellular organismal process (GO:0051241)	74	1.33e-06
imaginal disc pattern formation (GO:0007447)	49	1.37e-06
cell part morphogenesis (GO:0032990)	120	1.43e-06
eye photoreceptor cell differentiation (GO:0001754)	61	1.54e-06
establishment of ommatidial planar polarity (GO:0042067)	34	1.56e-06
negative regulation of cellular component organization (GO:0051129)	61	1.67e-06
cell morphogenesis (GO:0000902)	140	1.67e-06
leg disc morphogenesis (GO:0007478)	40	1.82e-06
spindle organization (GO:0007051)	53	1.84e-06
negative regulation of mitotic cell cycle phase transition (GO:1901991)	30	1.99e-06
microtubule organizing center organization (GO:0031023)	39	2.34e-06
regulation of neuroblast proliferation (GO:1902692)	31	2.59e-06
DNA replication (GO:0006260)	41	2.65e-06
negative regulation of cell cycle phase transition (GO:1901988)	30	2.73e-06
regulation of protein metabolic process (GO:0051246)	154	3.23e-06
sensory perception of chemical stimulus (GO:0007606)	12	3.6e-06
imaginal disc-derived leg morphogenesis (GO:0007480)	38	3.94e-06
Toll signaling pathway (GO:0008063)	29	3.95e-06
positive regulation of signaling (GO:0023056)	114	4.11e-06
positive regulation of cell communication (GO:0010647)	114	4.13e-06
establishment of planar polarity (GO:0001736)	43	4.27e-06
chromosome condensation (GO:0030261)	32	4.28e-06
establishment of tissue polarity (GO:0007164)	43	4.29e-06
negative regulation of nervous system development (GO:0051961)	49	4.32e-06
negative regulation of mitotic cell cycle (GO:0045930)	37	5.06e-06
regulation of stem cell proliferation (GO:0072091)	33	5.1e-06
response to stress (GO:0006950)	258	5.9e-06
regulation of neurogenesis (GO:0050767)	84	6.9e-06
centrosome cycle (GO:0007098)	36	7.53e-06
negative regulation of neurogenesis (GO:0050768)	37	7.91e-06
respiratory system development (GO:0060541)	78	7.91e-06
DNA-dependent DNA replication (GO:0006261)	37	7.93e-06
transmembrane transport (GO:0055085)	49	8.43e-06
morphogenesis of a polarized epithelium (GO:0001738)	45	8.69e-06
negative regulation of cell development (GO:0010721)	40	9e-06
organelle assembly (GO:0070925)	108	9.02e-06
import into nucleus (GO:0051170)	29	9.55e-06
histone acetylation (GO:0016573)	36	9.65e-06
neuron fate commitment (GO:0048663)	35	1.1e-05
detection of chemical stimulus (GO:0009593)	4	1.24e-05
cell fate determination (GO:0001709)	53	1.36e-05
peptidyl-lysine acetylation (GO:0018394)	36	1.37e-05
internal peptidyl-lysine acetylation (GO:0018393)	36	1.37e-05
protein import into nucleus (GO:0006606)	28	1.38e-05
internal protein amino acid acetylation (GO:0006475)	36	1.38e-05
negative regulation of signal transduction (GO:0009968)	93	1.38e-05
macromolecule modification (GO:0043412)	266	1.49e-05
regulation of cellular protein metabolic process (GO:0032268)	145	1.61e-05
mitotic spindle organization (GO:0007052)	35	1.66e-05
cellular protein modification process (GO:0006464)	248	1.67e-05
regulation of nervous system development (GO:0051960)	102	1.68e-05
protein modification process (GO:0036211)	248	1.68e-05
protein-DNA complex assembly (GO:0065004)	35	1.98e-05
regulation of neural precursor cell proliferation (GO:2000177)	32	2.05e-05
regulation of chromosome segregation (GO:0051983)	26	2.08e-05
protein acetylation (GO:0006473)	38	2.35e-05
ATP-dependent chromatin remodeling (GO:0043044)	28	2.4e-05
open tracheal system development (GO:0007424)	74	2.42e-05
eggshell chorion gene amplification (GO:0007307)	18	2.49e-05
male gamete generation (GO:0048232)	89	2.54e-05
photoreceptor cell fate commitment (GO:0046552)	30	2.55e-05
protein localization to nucleus (GO:0034504)	30	2.55e-05
negative regulation of cell population proliferation (GO:0008285)	38	2.66e-05
gland development (GO:0048732)	60	2.67e-05
mitochondrial gene expression (GO:0140053)	1	2.74e-05
response to external stimulus (GO:0009605)	218	2.76e-05
regulation of sister chromatid segregation (GO:0033045)	25	2.94e-05
DNA amplification (GO:0006277)	18	3.84e-05
maintenance of cell number (GO:0098727)	41	4.19e-05
stem cell population maintenance (GO:0019827)	41	4.21e-05
cell cycle checkpoint (GO:0000075)	30	4.24e-05
positive regulation of cell population proliferation (GO:0008284)	37	4.5e-05
axonogenesis (GO:0007409)	90	4.99e-05
axon development (GO:0061564)	92	5.1e-05
dendrite development (GO:0016358)	51	5.48e-05
proteasome-mediated ubiquitin-dependent protein catabolic process (GO:0043161)	65	5.55e-05
dendrite morphogenesis (GO:0048813)	50	6.13e-05
cation transport (GO:0006812)	18	6.19e-05
negative regulation of cell communication (GO:0010648)	95	6.26e-05
organic substance biosynthetic process (GO:1901576)	282	6.27e-05
cellular macromolecule catabolic process (GO:0044265)	113	6.39e-05
embryonic development via the syncytial blastoderm (GO:0001700)	58	6.45e-05
establishment or maintenance of cell polarity (GO:0007163)	68	6.5e-05
formation of anatomical boundary (GO:0048859)	25	7.11e-05
positive regulation of cell cycle (GO:0045787)	32	7.2e-05
chemotaxis (GO:0006935)	83	7.29e-05
regulation of cell death (GO:0010941)	77	8.23e-05
negative regulation of signaling (GO:0023057)	95	8.5e-05
ion transport (GO:0006811)	38	8.53e-05
mitochondrion organization (GO:0007005)	9	8.54e-05
transcription initiation from RNA polymerase II promoter (GO:0006367)	28	8.75e-05
regulation of programmed cell death (GO:0043067)	69	8.78e-05
cell cycle DNA replication (GO:0044786)	21	8.89e-05
imaginal disc-derived wing vein morphogenesis (GO:0008586)	24	0.000101
neuron projection guidance (GO:0097485)	80	0.000102
detection of stimulus (GO:0051606)	12	0.000102
negative regulation of organelle organization (GO:0010639)	38	0.000105
protein-containing complex localization (GO:0031503)	35	0.000108
inorganic ion transmembrane transport (GO:0098660)	8	0.000108
DNA biosynthetic process (GO:0071897)	23	0.000109
ion transmembrane transport (GO:0034220)	16	0.000109
embryo development ending in birth or egg hatching (GO:0009792)	60	0.000113
regulation of mitotic sister chromatid segregation (GO:0033047)	22	0.000115
proteasomal protein catabolic process (GO:0010498)	66	0.000115
embryonic morphogenesis (GO:0048598)	72	0.000115
cellular biosynthetic process (GO:0044249)	274	0.000115
mitotic cell cycle checkpoint (GO:0007093)	25	0.000119
negative regulation of chromosome organization (GO:2001251)	25	0.000119
regulation of G1/S transition of mitotic cell cycle (GO:2000045)	18	0.000121
stem cell proliferation (GO:0072089)	30	0.000122
regulation of cell cycle G1/S phase transition (GO:1902806)	19	0.000124
renal system development (GO:0072001)	33	0.000129
urogenital system development (GO:0001655)	33	0.000129
meiotic chromosome segregation (GO:0045132)	34	0.000129
eye photoreceptor cell fate commitment (GO:0042706)	26	0.000137
compound eye photoreceptor fate commitment (GO:0001752)	26	0.000137
Malpighian tubule development (GO:0072002)	30	0.000145
renal tubule development (GO:0061326)	30	0.000145
stem cell division (GO:0017145)	37	0.000145
meiotic nuclear division (GO:0140013)	58	0.000184
protein-containing complex assembly (GO:0065003)	115	0.000184
positive regulation of programmed cell death (GO:0043068)	36	0.00021
cell migration (GO:0016477)	79	0.000214
localization of cell (GO:0051674)	91	0.00022
peptidyl-amino acid modification (GO:0018193)	96	0.000222
spermatogenesis (GO:0007283)	75	0.000224
taxis (GO:0042330)	93	0.000225
larval development (GO:0002164)	53	0.000226
stem cell differentiation (GO:0048863)	32	0.000233
modification-dependent protein catabolic process (GO:0019941)	82	0.000235
inorganic cation transmembrane transport (GO:0098662)	7	0.000235
regulation of DNA-templated transcription, initiation (GO:2000142)	17	0.000241
regulation of transcription initiation from RNA polymerase II promoter (GO:0060260)	17	0.000242
mitochondrial translation (GO:0032543)	1	0.000243
ventral cord development (GO:0007419)	33	0.000252
cell motility (GO:0048870)	89	0.000253
protein acylation (GO:0043543)	41	0.000288
cytoskeleton-dependent cytokinesis (GO:0061640)	41	0.000289
digestive system development (GO:0055123)	40	0.000306
digestive tract development (GO:0048565)	40	0.000306
sex determination (GO:0007530)	20	0.000311
cell fate specification (GO:0001708)	34	0.000311
regulation of mitotic sister chromatid separation (GO:0010965)	20	0.000312
regulation of cellular protein localization (GO:1903827)	27	0.000313
hindgut morphogenesis (GO:0007442)	27	0.000313
cellular response to stress (GO:0033554)	132	0.000313
hindgut development (GO:0061525)	27	0.000314
cytokinesis (GO:0000910)	41	0.000319
macromolecule catabolic process (GO:0009057)	120	0.000329
chromosome localization (GO:0050000)	18	0.000336
regulation of immune system process (GO:0002682)	68	0.000337
biosynthetic process (GO:0009058)	284	0.000352
spindle assembly (GO:0051225)	31	0.000375
immune system development (GO:0002520)	35	0.000378
hematopoietic or lymphoid organ development (GO:0048534)	35	0.000379
regulation of gene silencing (GO:0060968)	35	0.00038
ubiquitin-dependent protein catabolic process (GO:0006511)	80	0.000381
modification-dependent macromolecule catabolic process (GO:0043632)	82	0.000383
animal organ formation (GO:0048645)	23	0.0004
regulation of chromosome separation (GO:1905818)	20	0.000408
cell fate commitment involved in pattern specification (GO:0060581)	20	0.000409
regulation of protein localization (GO:0032880)	39	0.000418
peripheral nervous system development (GO:0007422)	27	0.000425
negative regulation of gene expression, epigenetic (GO:0045814)	31	0.000426
chromatin silencing (GO:0006342)	31	0.000427
chromatin organization involved in negative regulation of transcription (GO:0097549)	31	0.000428
wing disc pattern formation (GO:0035222)	33	0.00043
mitotic cell cycle phase transition (GO:0044772)	19	0.000431
neuroblast proliferation (GO:0007405)	26	0.000444
neural precursor cell proliferation (GO:0061351)	26	0.000445
chromatin organization involved in regulation of transcription (GO:0034401)	33	0.000463
cellular protein catabolic process (GO:0044257)	86	0.000464
proton transmembrane transport (GO:1902600)	0	0.000481
Golgi vesicle transport (GO:0048193)	4	0.000513
meiosis I cell cycle process (GO:0061982)	39	0.000544
chromatin assembly or disassembly (GO:0006333)	22	0.00057
cellular protein-containing complex assembly (GO:0034622)	103	0.000593
proteolysis involved in cellular protein catabolic process (GO:0051603)	85	0.000594
mitotic cytokinesis (GO:0000281)	30	0.000605
double-strand break repair via homologous recombination (GO:0000724)	27	0.000606
recombinational repair (GO:0000725)	27	0.000607
protein metabolic process (GO:0019538)	421	0.000643
digestive tract morphogenesis (GO:0048546)	29	0.000664
DNA recombination (GO:0006310)	35	0.000728
nuclear export (GO:0051168)	26	0.000729
response to anesthetic (GO:0072347)	0	0.000729
cellular respiration (GO:0045333)	4	0.000735
ribonucleoprotein complex biogenesis (GO:0022613)	79	0.000746
positive regulation of cell death (GO:0010942)	37	0.000764
protein catabolic process (GO:0030163)	89	0.000788
regulation of Wnt signaling pathway (GO:0030111)	35	0.000805
detection of chemical stimulus involved in sensory perception (GO:0050907)	2	0.000807
positive regulation of cellular protein metabolic process (GO:0032270)	75	0.00091
regulation of chromatin silencing (GO:0031935)	24	0.000945
cation transmembrane transport (GO:0098655)	10	0.000945
axon guidance (GO:0007411)	73	0.000963
regulation of protein modification process (GO:0031399)	83	0.000988
cell cycle phase transition (GO:0044770)	19	0.00101
DNA-templated transcription, initiation (GO:0006352)	29	0.00101
regulation of canonical Wnt signaling pathway (GO:0060828)	31	0.00103
double-strand break repair (GO:0006302)	34	0.00114
positive regulation of mitotic cell cycle (GO:0045931)	20	0.00119
regulation of mitotic metaphase/anaphase transition (GO:0030071)	17	0.0012
positive regulation of cell cycle process (GO:0090068)	23	0.00123
regulation of animal organ morphogenesis (GO:2000027)	36	0.00123
axis specification (GO:0009798)	54	0.00123
establishment of organelle localization (GO:0051656)	47	0.00129
eggshell chorion assembly (GO:0007306)	33	0.00132
asymmetric stem cell division (GO:0098722)	27	0.00137
negative regulation of neural precursor cell proliferation (GO:2000178)	18	0.00146
negative regulation of neuroblast proliferation (GO:0007406)	18	0.00146
heterochromatin organization (GO:0070828)	20	0.00152
response to external biotic stimulus (GO:0043207)	103	0.00154
response to other organism (GO:0051707)	103	0.00154
response to biotic stimulus (GO:0009607)	103	0.00154
embryonic hindgut morphogenesis (GO:0048619)	23	0.00157
regulation of metaphase/anaphase transition of cell cycle (GO:1902099)	17	0.00158
mitotic cell cycle, embryonic (GO:0045448)	17	0.00159
embryonic axis specification (GO:0000578)	38	0.00164
regulation of multi-organism process (GO:0043900)	67	0.00166
compound eye cone cell differentiation (GO:0042675)	12	0.0017
positive regulation of protein metabolic process (GO:0051247)	77	0.00174
cytoplasmic translation (GO:0002181)	40	0.00178
establishment of chromosome localization (GO:0051303)	15	0.00179
spliceosomal snRNP assembly (GO:0000387)	13	0.0018
negative regulation of sister chromatid segregation (GO:0033046)	13	0.00181
intraciliary transport (GO:0042073)	14	0.00182
protein export from nucleus (GO:0006611)	23	0.00182
hemopoiesis (GO:0030097)	30	0.00182
positive regulation of chromosome organization (GO:2001252)	26	0.00195
anterior/posterior axis specification, embryo (GO:0008595)	37	0.00206
tripartite regional subdivision (GO:0007351)	37	0.00206
germ-line stem cell population maintenance (GO:0030718)	30	0.00207
negative regulation of stem cell proliferation (GO:2000647)	19	0.00216
RNA localization (GO:0006403)	48	0.00218
mitochondrial transport (GO:0006839)	3	0.00222
brain development (GO:0007420)	39	0.00224
periodic partitioning (GO:0007365)	22	0.00225
regulation of Notch signaling pathway (GO:0008593)	29	0.00228
protein targeting (GO:0006605)	5	0.00236
sensory organ boundary specification (GO:0008052)	15	0.0024
nucleus organization (GO:0006997)	31	0.0024
proteasomal ubiquitin-independent protein catabolic process (GO:0010499)	15	0.00241
centrosome duplication (GO:0051298)	18	0.00241
ribonucleoprotein complex subunit organization (GO:0071826)	47	0.00241
ATP metabolic process (GO:0046034)	6	0.00248
negative regulation of chromosome segregation (GO:0051985)	13	0.00255
oocyte differentiation (GO:0009994)	47	0.0027
stem cell fate commitment (GO:0048865)	19	0.00272
regulation of apoptotic process (GO:0042981)	56	0.00279
negative regulation of Wnt signaling pathway (GO:0030178)	21	0.00286
response to sterol (GO:0036314)	21	0.00286
response to ecdysone (GO:0035075)	21	0.00287
regulation of response to external stimulus (GO:0032101)	63	0.00295
hemocyte differentiation (GO:0042386)	16	0.00296
positive regulation of chromatin organization (GO:1905269)	22	0.00306
formation of animal organ boundary (GO:0010160)	18	0.00307
ameboidal-type cell migration (GO:0001667)	50	0.00315
centriole replication (GO:0007099)	15	0.0032
antennal development (GO:0007469)	15	0.0032
sensory perception of taste (GO:0050909)	1	0.0032
regulation of histone modification (GO:0031056)	21	0.00323
cellular catabolic process (GO:0044248)	166	0.00328
ribonucleoprotein complex assembly (GO:0022618)	44	0.00334
oxidative phosphorylation (GO:0006119)	2	0.00334
smoothened signaling pathway (GO:0007224)	11	0.00337
protein transport along microtubule (GO:0098840)	14	0.00338
microtubule-based protein transport (GO:0099118)	14	0.00338
negative regulation of nuclear division (GO:0051784)	14	0.00339
DNA endoreduplication (GO:0042023)	12	0.00351
positive regulation of stem cell proliferation (GO:2000648)	13	0.00351
syncytial blastoderm mitotic cell cycle (GO:0035186)	12	0.00352
cell cycle comprising mitosis without cytokinesis (GO:0033301)	13	0.00352
mRNA transport (GO:0051028)	20	0.0037
response to ketone (GO:1901654)	21	0.0037
eye-antennal disc morphogenesis (GO:0007455)	20	0.00371
histone H3 acetylation (GO:0043966)	16	0.00379
female meiotic nuclear division (GO:0007143)	28	0.00399
head development (GO:0060322)	43	0.00418
centriole assembly (GO:0098534)	15	0.00419
reproductive structure development (GO:0048608)	30	0.00419
reproductive system development (GO:0061458)	30	0.0042
detection of stimulus involved in sensory perception (GO:0050906)	5	0.00435
mitotic chromosome condensation (GO:0007076)	14	0.00455
sex differentiation (GO:0007548)	34	0.00455
regulation of anatomical structure size (GO:0090066)	68	0.00465
oocyte development (GO:0048599)	41	0.00466
chromosome separation (GO:0051304)	13	0.00481
chromatin assembly (GO:0031497)	18	0.00481
metaphase plate congression (GO:0051310)	13	0.00482
DNA integrity checkpoint (GO:0031570)	18	0.00482
negative regulation of mitotic metaphase/anaphase transition (GO:0045841)	11	0.00487
negative regulation of mitotic sister chromatid separation (GO:2000816)	11	0.00488
negative regulation of mitotic sister chromatid segregation (GO:0033048)	11	0.00488
negative regulation of mitotic nuclear division (GO:0045839)	12	0.00491
protein modification by small protein conjugation or removal (GO:0070647)	69	0.00491
calcium ion transport (GO:0006816)	0	0.00491
tissue migration (GO:0090130)	46	0.00522
cell surface receptor signaling pathway involved in cell-cell signaling (GO:1905114)	20	0.00526
RNA export from nucleus (GO:0006405)	20	0.00527
regulation of imaginal disc growth (GO:0045570)	20	0.00528
anterior/posterior axis specification (GO:0009948)	38	0.00533
proximal/distal pattern formation (GO:0009954)	15	0.00538
regulation of localization (GO:0032879)	111	0.00538
nucleotide-excision repair (GO:0006289)	15	0.00539
lymph gland development (GO:0048542)	23	0.00545
response to lipid (GO:0033993)	23	0.00546
lipid metabolic process (GO:0006629)	46	0.00546
negative regulation of growth (GO:0045926)	34	0.00551
cilium organization (GO:0044782)	40	0.00573
positive regulation of multi-organism process (GO:0043902)	44	0.00574
regulation of cellular component biogenesis (GO:0044087)	78	0.00582
establishment of RNA localization (GO:0051236)	31	0.00591
somatic stem cell division (GO:0048103)	20	0.0061
cell fate determination involved in pattern specification (GO:0060582)	13	0.00637
histone H4 acetylation (GO:0043967)	13	0.00638
sensory organ precursor cell fate determination (GO:0016360)	13	0.00639
Wnt signaling pathway (GO:0016055)	19	0.00655
monovalent inorganic cation transport (GO:0015672)	9	0.00655
asymmetric neuroblast division (GO:0055059)	19	0.00656
posttranscriptional regulation of gene expression (GO:0010608)	56	0.00656
positive regulation of cell differentiation (GO:0045597)	47	0.00657
energy derivation by oxidation of organic compounds (GO:0015980)	8	0.00665
negative regulation of chromosome separation (GO:1905819)	11	0.00681
negative regulation of metaphase/anaphase transition of cell cycle (GO:1902100)	11	0.00682
positive regulation of neuroblast proliferation (GO:0002052)	11	0.00683
regulation of cellular localization (GO:0060341)	43	0.00684
positive regulation of cellular protein localization (GO:1903829)	15	0.00686
imaginal disc-derived wing margin morphogenesis (GO:0008587)	22	0.00706
immune response (GO:0006955)	54	0.00709
eggshell formation (GO:0030703)	39	0.00716
response to alcohol (GO:0097305)	37	0.00748
immune effector process (GO:0002252)	28	0.00787
epithelium migration (GO:0090132)	43	0.00797
electron transport chain (GO:0022900)	3	0.00798
nucleic acid transport (GO:0050657)	30	0.00807
RNA transport (GO:0050658)	30	0.00808
dosage compensation (GO:0007549)	13	0.00842
segment polarity determination (GO:0007367)	18	0.00842
regulation of growth (GO:0040008)	76	0.00864
neuronal stem cell division (GO:0036445)	19	0.00865
regulation of cell division (GO:0051302)	19	0.00866
neuroblast division (GO:0055057)	19	0.00868
heterochromatin organization involved in chromatin silencing (GO:0070868)	15	0.0087
mRNA export from nucleus (GO:0006406)	15	0.00871
mRNA-containing ribonucleoprotein complex export from nucleus (GO:0071427)	15	0.00873
ommatidial rotation (GO:0016318)	15	0.00874
sister chromatid cohesion (GO:0007062)	15	0.00876
histone methylation (GO:0016571)	23	0.00881
aerobic respiration (GO:0009060)	1	0.0089
sensory perception (GO:0007600)	33	0.00897
regulation of response to biotic stimulus (GO:0002831)	46	0.00922
spindle checkpoint (GO:0031577)	10	0.00926
chorion-containing eggshell formation (GO:0007304)	38	0.00926
negative regulation of G1/S transition of mitotic cell cycle (GO:2000134)	10	0.00927
positive regulation of DNA-templated transcription, initiation (GO:2000144)	10	0.00929
spindle assembly checkpoint (GO:0071173)	10	0.0093
positive regulation of neural precursor cell proliferation (GO:2000179)	11	0.0093
negative regulation of canonical Wnt signaling pathway (GO:0090090)	18	0.00931
mitotic spindle checkpoint (GO:0071174)	10	0.00932
DNA strand elongation (GO:0022616)	11	0.00932
head involution (GO:0008258)	18	0.00932
mitotic spindle assembly checkpoint (GO:0007094)	10	0.00933
DNA strand elongation involved in DNA replication (GO:0006271)	11	0.00933
negative regulation of cell cycle G1/S phase transition (GO:1902807)	10	0.00935
response to endogenous stimulus (GO:0009719)	53	0.00935
ATP synthesis coupled electron transport (GO:0042773)	2	0.00935
positive regulation of transcription initiation from RNA polymerase II promoter (GO:0060261)	10	0.00936
positive regulation of Notch signaling pathway (GO:0045747)	16	0.00937
female meiosis chromosome segregation (GO:0016321)	16	0.00938
muscle structure development (GO:0061061)	58	0.00966
morphogenesis of follicular epithelium (GO:0016333)	21	0.00976
positive regulation of cell development (GO:0010720)	44	0.00983
defense response to other organism (GO:0098542)	84	0.00986
negative regulation of developmental growth (GO:0048640)	29	0.01
sensory perception of bitter taste (GO:0050913)	0	0.0101
ribonucleoprotein complex export from nucleus (GO:0071426)	18	0.0104
ribonucleoprotein complex localization (GO:0071166)	18	0.0104
development of primary sexual characteristics (GO:0045137)	21	0.0106
gonad development (GO:0008406)	21	0.0106
respiratory electron transport chain (GO:0022904)	3	0.0107
organelle localization (GO:0051640)	57	0.0114
R7 cell differentiation (GO:0045466)	19	0.0116
response to virus (GO:0009615)	19	0.0116
programmed cell death involved in cell development (GO:0010623)	29	0.0116
cell projection assembly (GO:0030031)	43	0.0116
regulation of binding (GO:0051098)	14	0.0122
mitochondrial ATP synthesis coupled electron transport (GO:0042775)	2	0.0124
nuclear DNA replication (GO:0033260)	11	0.0125
RNA 3'-end processing (GO:0031123)	24	0.0128
oocyte axis specification (GO:0007309)	35	0.013
regulation of protein stability (GO:0031647)	21	0.0132
gene silencing by RNA (GO:0031047)	23	0.0137
circulatory system development (GO:0072359)	33	0.0137
mitotic spindle assembly (GO:0090307)	13	0.0138
regulation of cellular component movement (GO:0051270)	35	0.0138
cellular response to growth factor stimulus (GO:0071363)	18	0.014
epithelial cell migration (GO:0010631)	42	0.0141
imaginal disc-derived wing vein specification (GO:0007474)	21	0.015
positive regulation of immune system process (GO:0002684)	34	0.0151
organonitrogen compound catabolic process (GO:1901565)	113	0.0151
leg disc pattern formation (GO:0035223)	12	0.0154
proximal/distal pattern formation, imaginal disc (GO:0007449)	12	0.0154
protein import (GO:0017038)	30	0.0156
maternal determination of anterior/posterior axis, embryo (GO:0008358)	26	0.0159
response to carbon dioxide (GO:0010037)	0	0.0159
heart development (GO:0007507)	32	0.0161
post-embryonic hemopoiesis (GO:0035166)	18	0.0164
renal tubule morphogenesis (GO:0061333)	18	0.0164
Malpighian tubule morphogenesis (GO:0007443)	18	0.0164
transport (GO:0006810)	211	0.0164
response to growth factor (GO:0070848)	18	0.0165
larval lymph gland hemopoiesis (GO:0035167)	18	0.0165
DNA replication initiation (GO:0006270)	11	0.0167
regulation of retinal cell programmed cell death (GO:0046668)	11	0.0167
posttranscriptional gene silencing (GO:0016441)	21	0.0169
segment specification (GO:0007379)	16	0.0171
mitotic DNA integrity checkpoint (GO:0044774)	13	0.0175
regulation of nucleocytoplasmic transport (GO:0046822)	13	0.0175
cell maturation (GO:0048469)	45	0.0177
negative regulation of cellular component movement (GO:0051271)	10	0.0178
synaptic vesicle cycle (GO:0099504)	5	0.0179
vesicle-mediated transport in synapse (GO:0099003)	5	0.0179
wing and notum subfield formation (GO:0035309)	9	0.0183
posttranscriptional gene silencing by RNA (GO:0035194)	20	0.0184
defense response (GO:0006952)	85	0.0188
epithelial cell migration, open tracheal system (GO:0007427)	16	0.0189
histone exchange (GO:0043486)	16	0.0189
protein modification by small protein removal (GO:0070646)	22	0.0189
regulation of receptor signaling pathway via STAT (GO:1904892)	14	0.0191
neuroblast fate commitment (GO:0014017)	14	0.0191
regulation of receptor signaling pathway via JAK-STAT (GO:0046425)	14	0.0191
oocyte anterior/posterior axis specification (GO:0007314)	25	0.0197
negative regulation of cellular protein metabolic process (GO:0032269)	53	0.0199
regulation of anatomical structure morphogenesis (GO:0022603)	64	0.02
plasma membrane bounded cell projection assembly (GO:0120031)	39	0.0201
oocyte construction (GO:0007308)	35	0.0203
pole plasm assembly (GO:0007315)	20	0.0207
macromolecule methylation (GO:0043414)	35	0.0212
protein methylation (GO:0006479)	25	0.0216
protein alkylation (GO:0008213)	25	0.0216
cellular component assembly involved in morphogenesis (GO:0010927)	42	0.0216
DNA duplex unwinding (GO:0032508)	11	0.0217
somatic sex determination (GO:0018993)	11	0.0217
regulation of protein phosphorylation (GO:0001932)	54	0.0217
germ-line cyst encapsulation (GO:0048138)	11	0.0218
positive regulation of cell cycle phase transition (GO:1901989)	13	0.0218
dorsal/ventral pattern formation (GO:0009953)	42	0.022
generation of precursor metabolites and energy (GO:0006091)	15	0.022
response to organic cyclic compound (GO:0014070)	31	0.0224
cell-cell signaling by wnt (GO:0198738)	19	0.0231
positive regulation of apoptotic process (GO:0043065)	24	0.0231
regulation of proteolysis (GO:0030162)	40	0.0231
regulation of molecular function (GO:0065009)	95	0.0233
cell fate specification involved in pattern specification (GO:0060573)	7	0.0236
mitotic metaphase plate congression (GO:0007080)	10	0.0236
negative regulation of locomotion (GO:0040013)	10	0.0236
primary sex determination (GO:0007538)	10	0.0236
cellular lipid metabolic process (GO:0044255)	38	0.0236
endosomal transport (GO:0016197)	5	0.0243
positive regulation of mitotic cell cycle phase transition (GO:1901992)	12	0.0247
regulation of transposition (GO:0010528)	12	0.0247
establishment of protein localization to membrane (GO:0090150)	2	0.0247
regulation of protein acetylation (GO:1901983)	9	0.0248
regulation of histone acetylation (GO:0035065)	9	0.0248
regulation of mitotic cell cycle, embryonic (GO:0009794)	9	0.0248
dendrite guidance (GO:0070983)	12	0.0248
regulation of peptidyl-lysine acetylation (GO:2000756)	9	0.0249
nucleosome mobilization (GO:0042766)	8	0.0251
morphogenesis of embryonic epithelium (GO:0016331)	36	0.0256
negative regulation of protein metabolic process (GO:0051248)	53	0.0256
chaeta development (GO:0022416)	26	0.0263
regulation of G2/M transition of mitotic cell cycle (GO:0010389)	15	0.0266
negative regulation of neuron differentiation (GO:0045665)	15	0.0266
cellularization (GO:0007349)	32	0.0266
regulation of cell cycle G2/M phase transition (GO:1902749)	15	0.0267
regulation of cell fate specification (GO:0042659)	13	0.0268
neuroblast differentiation (GO:0014016)	18	0.0272
positive regulation of histone modification (GO:0031058)	11	0.0277
germarium-derived egg chamber formation (GO:0007293)	30	0.0278
cilium assembly (GO:0060271)	34	0.0288
regulation of organ growth (GO:0046620)	23	0.0296
regulation of antimicrobial humoral response (GO:0002759)	23	0.0296
anterograde trans-synaptic signaling (GO:0098916)	17	0.0296
chemical synaptic transmission (GO:0007268)	17	0.0297
regulation of compound eye retinal cell programmed cell death (GO:0046669)	10	0.0309
leg disc proximal/distal pattern formation (GO:0007479)	10	0.0309
equator specification (GO:0045317)	6	0.031
vesicle fusion (GO:0006906)	0	0.0312
positive regulation of response to biotic stimulus (GO:0002833)	30	0.0315
positive regulation of immune effector process (GO:0002699)	19	0.032
gliogenesis (GO:0042063)	25	0.032
positive regulation of antimicrobial peptide production (GO:0002225)	19	0.0321
positive regulation of antimicrobial humoral response (GO:0002760)	19	0.0321
positive regulation of production of molecular mediator of immune response (GO:0002702)	19	0.0321
exocrine system development (GO:0035272)	35	0.0321
salivary gland development (GO:0007431)	35	0.0321
actomyosin contractile ring assembly (GO:0000915)	9	0.0335
regulation of phosphorylation (GO:0042325)	58	0.0339
signal transduction (GO:0007165)	192	0.034
detection of chemical stimulus involved in sensory perception of smell (GO:0050911)	2	0.034
regulation of locomotion (GO:0040012)	33	0.0341
regulation of response to stress (GO:0080134)	67	0.0342
nuclear pore organization (GO:0006999)	7	0.0347
mRNA 3'-end processing (GO:0031124)	14	0.0347
nucleosome assembly (GO:0006334)	14	0.0347
positive regulation of organelle organization (GO:0010638)	40	0.0347
neuron fate determination (GO:0048664)	7	0.0348
DNA geometric change (GO:0032392)	11	0.0348
cellular response to fibroblast growth factor stimulus (GO:0044344)	11	0.0348
regulation of apoptotic signaling pathway (GO:2001233)	11	0.0349
fibroblast growth factor receptor signaling pathway (GO:0008543)	11	0.0349
epidermal growth factor receptor signaling pathway (GO:0007173)	11	0.035
ERBB signaling pathway (GO:0038127)	11	0.035
response to fibroblast growth factor (GO:0071774)	11	0.0351
methylation (GO:0032259)	35	0.0358
regulation of smoothened signaling pathway (GO:0008589)	21	0.0359
regulation of antimicrobial peptide production (GO:0002784)	21	0.0359
positive regulation of protein modification process (GO:0031401)	43	0.0376
chromosome organization involved in meiotic cell cycle (GO:0070192)	20	0.0379
stem cell development (GO:0048864)	12	0.038
negative regulation of Notch signaling pathway (GO:0045746)	17	0.038
nucleobase-containing compound transport (GO:0015931)	31	0.038
regulation of humoral immune response (GO:0002920)	23	0.0388
peptidyl-lysine methylation (GO:0018022)	18	0.0393
vesicle organization (GO:0016050)	4	0.0403
dorsal closure (GO:0007391)	31	0.0404
regulation of cell motility (GO:2000145)	25	0.0405
trans-synaptic signaling (GO:0099537)	18	0.0414
synaptic signaling (GO:0099536)	18	0.0419
regulation of DNA-binding transcription factor activity (GO:0051090)	14	0.0425
instar larval development (GO:0002168)	24	0.0427
assembly of actomyosin apparatus involved in cytokinesis (GO:0000912)	9	0.044
positive regulation of cellular component organization (GO:0051130)	70	0.0443
cytokinetic process (GO:0032506)	15	0.0451
positive regulation of canonical Wnt signaling pathway (GO:0090263)	15	0.0451
RNA polymerase II preinitiation complex assembly (GO:0051123)	8	0.0475
negative regulation of chemotaxis (GO:0050922)	6	0.0476
non-canonical Wnt signaling pathway (GO:0035567)	8	0.0476
negative regulation of cell morphogenesis involved in differentiation (GO:0010771)	8	0.0476
regulation of protein export from nucleus (GO:0046825)	6	0.0477
leading strand elongation (GO:0006272)	6	0.0477
regulation of cell migration (GO:0030334)	24	0.0477
intraciliary retrograde transport (GO:0035721)	6	0.0478
regulation of chemotaxis (GO:0050920)	14	0.0482
regulation of cellular amide metabolic process (GO:0034248)	47	0.0482
regulation of defense response (GO:0031347)	39	0.0483
negative regulation of axonogenesis (GO:0050771)	7	0.0489
foregut morphogenesis (GO:0007440)	7	0.0489
dedifferentiation (GO:0043696)	7	0.049
regulation of RNA polymerase II transcriptional preinitiation complex assembly (GO:0045898)	7	0.0491
cell dedifferentiation (GO:0043697)	7	0.0491
positive regulation of humoral immune response (GO:0002922)	19	0.0491
developmental maturation (GO:0021700)	47	0.0491
DNA unwinding involved in DNA replication (GO:0006268)	7	0.0492
attachment of spindle microtubules to kinetochore (GO:0008608)	7	0.0493
sensory organ precursor cell division (GO:0045035)	7	0.0493
female germ-line stem cell population maintenance (GO:0036099)	13	0.0495
regulation of cyclin-dependent protein kinase activity (GO:1904029)	10	0.0497
regulation of cyclin-dependent protein serine/threonine kinase activity (GO:0000079)	10	0.0498
somatic stem cell population maintenance (GO:0035019)	10	0.0498

## Sheet: Table S5
Table S5: Genes associated with signaling (GO:0023052) that were differentially expressed between 21 and 40 h APF
FlyBase ID	gene	log2 (40 h APF/ 21 h APF)
Wingless/Wnt
FBgn0086356	tum	-5.14388
FBgn0004360	Wnt2	-4.55745
FBgn0284084	wg	-0.801133
FBgn0000119	arr	-0.642215
FBgn0261885	osa	-0.557864
FBgn0043900	pygo	-0.505552
FBgn0024245	dnt	-0.380396
FBgn0016977	spen	-0.365679
FBgn0000499	dsh	-0.278073
FBgn0003371	sgg	0.288105
FBgn0045866	bai	0.36458
FBgn0069242	eca	0.379104
FBgn0260855	Sec22	0.697445
FBgn0000711	flw	0.832181
FBgn0031903	Wnt10	1.56583
FBgn0031902	Wnt6	1.58432
Maintainence of Cell Number
FBgn0260399	gwl	-2.74095
FBgn0019972	Drice	-0.935071
FBgn0011763	Dp	-0.76509
FBgn0011706	rpr	-0.732714
FBgn0020381	Dredd	-0.613655
FBgn0011604	Iswi	-0.452724
FBgn0015799	Rbf	-0.447358
FBgn0015946	grim	0.495237
Ca2+ Signaling
FBgn0261612	CngA	-2.65081
FBgn0026064	KP78a	-1.96764
FBgn0261278	grp	-1.10352
FBgn0034950	Pask	0.348396
FBgn0265605	Ric	0.760514
FBgn0015614	CanB2	0.83055
FBgn0010014	CanB	0.960893
FBgn0052451	SPoCk	0.985368
FBgn0267912	CanA-14F	1.00402
FBgn0264077	Cnx14D	1.24298
FBgn0031299	CG4629	1.3242
FBgn0038603	PKD	1.68874
FBgn0263980	CG43729	3.49292
RhoGTPase and Cytoskeletal Signaling
FBgn0002466	sti	-3.97825
FBgn0034249	RhoGAP54D	-2.80245
FBgn0033845	mars	-1.61483
FBgn0014380	RhoL	-1.47309
FBgn0030893	RhoGAP16F	-1.32371
FBgn0031118	RhoGAP19D	-0.628563
FBgn0261461	RhoGAP18B	-0.568589
FBgn0014011	Rac2	-0.426672
FBgn0026374	Rhp	-0.409812
FBgn0036518	RhoGAP71E	-0.409661
FBgn0010341	Cdc42	-0.279988
FBgn0250789	alpha-Spec	0.309563
FBgn0039532	Mtl	0.317327
FBgn0003392	shi	0.393456
FBgn0250788	beta-Spec	0.394987
FBgn0044826	Pak3	0.54094
FBgn0038747	RhoGAP92B	0.754433
FBgn0285955	cv-c	0.781828
FBgn0039883	RhoGAP100F	0.797326
FBgn0025743	mbt	1.11196
FBgn0010424	TpnC73F	1.67859
FBgn0267431	Myo81F	2.77222
FBgn0031692	TpnC25D	6.13798
FBgn0013348	TpnC41C	inf
Neuronal Signaling
FBgn0261090	Sytbeta	-4.86722
FBgn0033058	CCHa2-R	-4.60336
FBgn0031634	Ir25a	-2.53748
FBgn0259099	DCX-EMAP	-1.87703
FBgn0039747	AdoR	-1.50815
FBgn0087012	5-HT2A	-1.41007
FBgn0019686	lok	-1.40067
FBgn0014019	Rh5	-1.37342
FBgn0034013	unc-5	-1.29468
FBgn0264273	Sema2b	-1.24691
FBgn0250910	Octbeta3R	-1.10223
FBgn0026575	hang	-1.03404
FBgn0052677	X11Lbeta	-0.995588
FBgn0046687	Tre1	-0.920685
FBgn0035390	scramb2	-0.870889
FBgn0038966	pinta	-0.856853
FBgn0029768	SPR	-0.847906
FBgn0050361	mtt	-0.836955
FBgn0284221	Sema5c	-0.783586
FBgn0011260	Sema2a	-0.569258
FBgn0002937	ninaB	-0.554463
FBgn0263916	Ent2	-0.511603
FBgn0016059	Sema1b	-0.485944
FBgn0036641	Smn	-0.453768
FBgn0033438	Mmp2	-0.417694
FBgn0021800	Reph	-0.37463
FBgn0263968	nonC	-0.332453
FBgn0266418	wake	-0.310646
FBgn0010905	Spn	-0.272913
FBgn0264607	CaMKII	0.284699
FBgn0086784	stmA	0.297439
FBgn0028400	Syt4	0.300709
FBgn0004179	Csp	0.387928
FBgn0011259	Sema1a	0.399166
FBgn0033987	ckn	0.41104
FBgn0014133	bif	0.431697
FBgn0027491	Cdk5alpha	0.462164
FBgn0030412	Tomosyn	0.495098
FBgn0011826	Pp2B-14D	0.509269
FBgn0039900	Syt7	0.511728
FBgn0032151	nAChRalpha6	0.528409
FBgn0261244	inaE	0.532379
FBgn0039141	spas	0.540752
FBgn0040285	Scamp	0.546832
FBgn0013759	CASK	0.552376
FBgn0041707	7B2	0.573341
FBgn0053653	Cadps	0.582773
FBgn0000346	comt	0.592831
FBgn0039927	CG11155	0.597577
FBgn0013334	Sap47	0.646622
FBgn0034789	PIP5K59B	0.647832
FBgn0267001	Ten-a	0.647871
FBgn0264089	sli	0.664769
FBgn0002921	Atpalpha	0.668732
FBgn0039269	veli	0.688464
FBgn0035092	Nplp1	0.717939
FBgn0025702	Srpk79D	0.756321
FBgn0004242	Syt1	0.775632
FBgn0035538	DopEcR	0.801603
FBgn0050296	RIC-3	0.807858
FBgn0025697	santa-maria	0.83594
FBgn0004646	ogre	0.841882
FBgn0005564	Shal	0.856272
FBgn0265767	zyd	0.859306
FBgn0013342	nSyb	0.85944
FBgn0053547	Rim	0.868429
FBgn0036934	sNPF-R	0.877747
FBgn0086778	nAChRalpha7	0.886599
FBgn0019985	mGluR	0.906861
FBgn0004784	inaC	0.914744
FBgn0004449	Ten-m	0.920939
FBgn0027095	Manf	0.942705
FBgn0051721	Trim9	0.949143
FBgn0000253	Cam	0.988901
FBgn0037950	HisCl1	0.995165
FBgn0259822	Ca-beta	1.04461
FBgn0011603	ine	1.04475
FBgn0261794	kcc	1.07589
FBgn0015622	Cnx99A	1.10114
FBgn0030230	Rph	1.12175
FBgn0053517	Dop2R	1.13301
FBgn0041605	cpx	1.14254
FBgn0038975	Nrx-1	1.14433
FBgn0259246	brp	1.15297
FBgn0261041	stj	1.15401
FBgn0029147	NtR	1.19197
FBgn0039419	CG12290	1.19794
FBgn0033911	VGAT	1.22006
FBgn0053639	CG33639	1.26536
FBgn0003218	rdgB	1.28782
FBgn0266347	nAChRalpha4	1.30588
FBgn0086704	stops	1.37226
FBgn0038980	Octbeta1R	1.39787
FBgn0260446	GABA-B-R1	1.43189
FBgn0011288	Snap25	1.43189
FBgn0025680	cry	1.43326
FBgn0265959	rdgC	1.43716
FBgn0004168	5-HT1A	1.50025
FBgn0263456	nwk	1.51752
FBgn0031770	CG13995	1.53573
FBgn0265416	Neto	1.56948
FBgn0016650	Lgr1	1.57829
FBgn0036544	sff	1.60774
FBgn0010240	Lcch3	1.66527
FBgn0034136	DAT	1.67642
FBgn0001991	Ca-alpha1D	1.69973
FBgn0031275	GABA-B-R3	1.71169
FBgn0261929	5-HT2B	1.72766
FBgn0031424	VGlut	1.7802
FBgn0015519	nAChRalpha3	1.87179
FBgn0031866	Nlg2	1.91518
FBgn0023023	CRMP	1.94601
FBgn0004118	nAChRbeta2	2.00038
FBgn0004620	GluRIIA	2.04008
FBgn0026439	Eaat1	2.07327
FBgn0083228	Frq2	2.22524
FBgn0263111	cac	2.24166
FBgn0038837	CG3822	2.25681
FBgn0004622	TkR99D	2.28172
FBgn0000039	nAChRalpha2	2.32551
FBgn0037546	mAChR-B	2.33672
FBgn0010329	Tbh	2.33832
FBgn0024944	Oamb	2.3855
FBgn0024963	GluClalpha	2.3952
FBgn0037408	NPFR	2.47383
FBgn0010399	Nmdar1	2.47854
FBgn0262483	Rbp	2.49684
FBgn0038653	CG18208	2.51544
FBgn0083975	Nlg4	2.52289
FBgn0262870	axo	2.54936
FBgn0261549	rdgA	2.73081
FBgn0000036	nAChRalpha1	2.78057
FBgn0036260	Rh7	2.8088
FBgn0032840	sNPF	2.93004
FBgn0030897	Frq1	3.01414
FBgn0085410	TrissinR	3.05245
FBgn0087005	rtp	3.1093
FBgn0262593	Shab	3.15845
FBgn0035010	CG13579	3.25283
FBgn0039722	Capa	3.28487
FBgn0259231	CCKLR-17D1	3.32091
FBgn0038063	Octbeta2R	3.37053
FBgn0004514	Oct-TyrR	3.37897
FBgn0266137	Dop1R2	3.38292
FBgn0028875	nAChRalpha5	3.41836
FBgn0001134	Grd	3.43003
FBgn0038874	ETHR	3.58314
FBgn0011582	Dop1R1	3.65972
FBgn0030707	CG8916	3.82564
FBgn0002936	ninaA	3.8453
FBgn0037163	laza	3.85285
FBgn0266429	AstA-R1	3.87468
FBgn0264087	Slob	3.89886
FBgn0000037	mAChR-A	3.92799
FBgn0285944	para	4.12268
FBgn0085387	shakB	4.12867
FBgn0013995	Calx	4.13712
FBgn0002938	ninaC	4.26039
FBgn0035385	FMRFaR	4.34711
FBgn0015591	AstA	4.3962
FBgn0004244	Rdl	4.51008
FBgn0000038	nAChRbeta1	5.17174
FBgn0052547	CG32547	5.26438
FBgn0042201	Nplp3	7.96887
FBgn0000121	Arr2	9.56111
Lipid Signaling
FBgn0030465	CG15743	-0.492113
FBgn0051140	CG31140	0.365324
FBgn0033075	Pld	0.418086
FBgn0030670	Pis	0.46133
FBgn0014906	Hydr2	0.472018
FBgn0037063	CG9391	0.681435
FBgn0085390	Dgk	0.941745
FBgn0003091	Pkc53E	1.53984
FBgn0010350	CdsA	1.70526
RTK and MAPK
FBgn0003366	sev	-2.48896
FBgn0015380	drl	-1.39095
FBgn0003118	pnt	-1.09191
FBgn0259211	grh	-0.972762
FBgn0003731	Egfr	-0.916716
FBgn0003079	Raf	-0.872917
FBgn0033649	pyr	-0.862046
FBgn0026376	Rgl	-0.842201
FBgn0003997	hid	-0.826598
FBgn0024194	rasp	-0.775075
FBgn0003984	vn	-0.750595
FBgn0001139	gro	-0.66971
FBgn0003205	Ras85D	-0.641367
FBgn0004638	drk	-0.640273
FBgn0010407	Ror	-0.544393
FBgn0016794	dos	-0.5413
FBgn0010269	Dsor1	-0.448965
FBgn0001965	Sos	-0.433564
FBgn0015296	Shc	-0.288048
FBgn0263930	dally	-0.282404
FBgn0011817	nmo	-0.27649
FBgn0000382	csw	0.323135
FBgn0029095	aru	0.347042
FBgn0015513	mbc	0.370886
FBgn0266465	GckIII	0.400485
FBgn0035001	Slik	0.412112
FBgn0052179	Krn	0.464642
FBgn0040068	Vav	0.513606
FBgn0263395	hppy	0.521752
FBgn0003165	pum	0.537212
FBgn0261811	pico	0.590569
FBgn0020299	stumps	0.67572
FBgn0014135	bnl	0.6981
FBgn0032006	Pvr	0.742333
FBgn0087011	CG41520	0.762107
FBgn0010389	htl	0.851376
FBgn0033652	ths	0.867188
FBgn0043070	MESK2	0.901361
FBgn0085443	spri	1.03747
FBgn0031888	Pvf2	1.13547
FBgn0022800	Cad96Ca	1.20587
FBgn0032752	CG10702	1.21358
FBgn0267339	p38c	1.35345
FBgn0011829	Ret	1.51338
FBgn0014073	Tie	1.6451
FBgn0040505	Alk	1.73088
FBgn0037326	CG14669	1.78705
FBgn0000206	boss	2.06425
FBgn0030964	Pvf1	3.07564
FBgn0085407	Pvf3	3.32768
FBgn0033668	exp	3.3536
FBgn0031518	CG3277	4.8055
Planar Cell Polarity
FBgn0027343	fz3	-1.58173
FBgn0284247	ds	-1.49694
FBgn0003090	pk	-1.15778
FBgn0001075	ft	-0.957947
FBgn0015838	Vang	-0.579707
FBgn0016797	fz2	-0.531818
FBgn0086898	dgo	-0.523849
FBgn0002121	l(2)gl	-0.503037
GPCR Signaling
FBgn0039821	CG15556	-4.7486
FBgn0004552	Akh	-4.24913
FBgn0035452	CG10359	-3.10318
FBgn0036742	CG7497	-2.46908
FBgn0051720	mthl15	-2.19631
FBgn0051760	CG31760	-1.90037
FBgn0052447	CG32447	-1.47561
FBgn0020278	loco	-0.993016
FBgn0001104	Galphai	-0.853382
FBgn0030242	sofe	-0.821906
FBgn0030466	CG15744	-0.503039
FBgn0259927	CG42450	-0.290051
FBgn0024941	RSG7	0.336811
FBgn0001122	Galphao	0.344128
FBgn0025777	homer	0.385138
FBgn0032409	Ced-12	0.459725
FBgn0034219	mthl4	0.615608
FBgn0028956	mthl3	0.628553
FBgn0004435	Galphaq	0.696572
FBgn0028292	ric8a	0.80605
FBgn0263029	CG43324	0.85942
FBgn0050054	CG30054	0.887358
FBgn0004611	Plc21C	1.0077
FBgn0051660	smog	1.04531
FBgn0052843	Dh31-R	1.21001
FBgn0010051	Itp-r83A	1.30197
FBgn0267252	Ggamma30A	1.46854
FBgn0035331	MsR1	1.61432
FBgn0004623	Gbeta76C	1.81363
FBgn0085419	Rgk2	1.98778
FBgn0030164	CG1889	2.07469
FBgn0260753	Pdfr	2.35198
FBgn0050158	CG30158	2.58429
FBgn0026255	clumsy	2.68462
FBgn0038542	TyrR	2.71792
FBgn0260658	CG42541	2.79581
FBgn0264753	Rgk1	2.84525
FBgn0085426	Rgk3	3.1133
FBgn0033932	Dh44-R1	3.69953
FBgn0264339	CG43795	4.59335
JNK
FBgn0001291	Jra	-0.358015
FBgn0000229	bsk	0.264225
FBgn0015286	Rala	0.462713
FBgn0040281	Aplip1	0.467099
FBgn0243512	puc	0.493512
FBgn0024187	syd	0.518138
FBgn0033153	Gadd45	0.78765
Jak-Stat
FBgn0004956	upd1	-4.04102
FBgn0040308	Jafrac2	-1.25542
FBgn0259785	pzg	-1.10385
FBgn0032682	grnd	-0.784071
FBgn0015903	apt	-0.705695
FBgn0000541	E(bx)	-0.452616
FBgn0043903	dome	-0.432638
FBgn0041184	Socs36E	-0.294522
FBgn0004864	hop	-0.285395
Hedgehog
FBgn0003390	shf	-2.63676
FBgn0004859	ci	-2.21949
FBgn0031872	ihog	-1.26224
FBgn0003892	ptc	-0.769921
FBgn0003444	smo	-0.560615
FBgn0029088	disp	-0.503186
FBgn0000352	cos	-0.421074
FBgn0004644	hh	-0.349861
FBgn0003134	Pp1alpha-96A	0.360195
FBgn0040388	boi	0.435672
FBgn0000273	Pka-C1	0.621597
Regulation of Signal Transduction
FBgn0010197	Gyc32E	-5.42737
FBgn0013973	Gycbeta100B	-2.32094
FBgn0266136	Gyc76C	-0.748208
FBgn0036897	CG8786	-0.69222
FBgn0028694	Rpn11	-0.657677
FBgn0028692	Rpn2	-0.636274
FBgn0011327	Uch-L5	-0.631537
FBgn0250843	Prosalpha6	-0.59672
FBgn0039338	XNP	-0.586161
FBgn0015282	Rpt2	-0.579476
FBgn0086134	Prosalpha2	-0.579216
FBgn0028693	Rpn12	-0.572113
FBgn0028687	Rpt1	-0.569024
FBgn0250746	Prosbeta7	-0.555461
FBgn0028688	Rpn7	-0.536898
FBgn0004066	Prosalpha4	-0.53479
FBgn0023174	Prosbeta2	-0.515665
FBgn0028695	Rpn1	-0.514865
FBgn0026380	Prosbeta3	-0.469685
FBgn0016697	Prosalpha5	-0.446146
FBgn0028691	Rpn9	-0.442685
FBgn0261396	Rpn3	-0.415194
FBgn0023175	Prosalpha7	-0.409021
FBgn0032596	Prosbeta4	-0.400951
FBgn0002284	Prosbeta6	-0.395415
FBgn0028684	Rpt5	-0.391143
FBgn0028690	Rpn5	-0.377552
FBgn0028686	Rpt3	-0.37328
FBgn0259171	Pde9	-0.357044
FBgn0020369	Rpt6	-0.35605
FBgn0030486	Set2	-0.343177
FBgn0266599	Hsc70-4	-0.340215
FBgn0263121	Prosalpha1	-0.323054
FBgn0032216	Usp14	-0.298511
FBgn0028689	Rpn6	-0.278101
FBgn0026428	HDAC6	0.332903
FBgn0038438	Der-2	0.386675
FBgn0263006	SERCA	0.436114
FBgn0037105	S1P	0.4384
FBgn0000479	dnc	0.485902
FBgn0003301	rut	0.54488
FBgn0259145	CG42260	0.551007
FBgn0023416	Ac3	0.608589
FBgn0085370	Pde11	0.633086
FBgn0263120	Acsl	0.727184
FBgn0040918	schlank	0.732284
FBgn0001218	Hsc70-3	0.845361
FBgn0022382	Pka-R2	0.855515
FBgn0283531	Duox	0.856417
FBgn0038237	Pde6	0.92709
FBgn0013972	Gycalpha99B	1.00188
FBgn0011676	Nos	1.31417
FBgn0033885	DJ-1alpha	1.67775
FBgn0022710	Ac13E	1.74972
FBgn0004852	Ac76E	2.45896
FBgn0038435	Gyc89Da	2.50674
FBgn0263257	Cngl	2.99957
FBgn0036368	CG10738	3.44345
FBgn0000489	Pka-C3	3.60976
Hippo
FBgn0003866	tsh	-2.26884
FBgn0003345	sd	-0.821095
FBgn0261456	hpo	-0.557529
FBgn0086384	Mer	-0.534338
FBgn0000658	fj	0.311466
FBgn0001624	dlg1	0.427617
Endomembrane Transport
FBgn0025382	Rab27	-2.0007
FBgn0033876	Syngr	-0.76845
FBgn0033988	pcs	-0.574379
FBgn0015372	RabX1	-0.36841
FBgn0086372	lap	0.279902
FBgn0015795	Rab7	0.321564
FBgn0014010	Rab5	0.340505
FBgn0037364	Rab23	0.34837
FBgn0011708	Syx5	0.376739
FBgn0015797	Rab6	0.414346
FBgn0267849	Syx7	0.457309
FBgn0028741	fab1	0.464528
FBgn0005586	Rab3	0.550049
FBgn0004574	Rop	0.552121
FBgn0037084	Syx6	0.569615
FBgn0015791	Rab14	0.594579
FBgn0031882	Rab30	0.675124
FBgn0030613	Rab3-GEF	0.67867
FBgn0032901	sky	0.679298
FBgn0029959	Rab39	0.698816
FBgn0013343	Syx1A	0.745386
FBgn0035155	RabX6	0.759563
FBgn0036341	Syx13	0.890434
FBgn0261049	Vps45	0.918804
FBgn0053094	Synd	0.969313
FBgn0250791	alphaSnap	1.04208
FBgn0086913	Rab26	1.04352
FBgn0016975	stnB	1.0621
FBgn0002567	Rab32	1.13472
FBgn0266721	gammaSnap2	1.14218
FBgn0266758	Esyt2	1.3108
FBgn0035540	Syx17	1.60488
FBgn0004575	Syn	1.66022
Toll
FBgn0040322	GNBP2	-1.72773
FBgn0040321	GNBP3	-1.15711
FBgn0260632	dl	-0.651617
FBgn0033402	Myd88	-0.401659
FBgn0040323	GNBP1	-0.3632
FBgn0029114	Tollo	0.450896
FBgn0004364	18w	0.584059
FBgn0034476	Toll-7	0.677364
FBgn0036494	Toll-6	1.06789
FBgn0000533	ea	1.09577
FBgn0262473	Tl	1.59272
FBgn0039102	SPE	1.8513
Non-RTK
FBgn0000017	Abl	-0.52524
FBgn0003502	Btk29A	-0.348521
IMD Signaling
FBgn0035976	PGRP-LC	-0.506592
FBgn0024222	IKKbeta	-0.336052
Insulin and Hormone Signaling
FBgn0266411	sima	-0.317295
FBgn0283499	InR	0.374406
FBgn0033935	Sin1	0.471898
FBgn0038984	AdipoR	0.538119
FBgn0025625	Sik2	0.676031
FBgn0035499	Chd64	0.918229
FBgn0044047	Ilp6	1.07465
Steroid
FBgn0001078	ftz-f1	-2.44111
FBgn0036732	Oatp74D	-0.771364
FBgn0031381	Npc2a	0.387995
FBgn0035542	DOR	0.4038
FBgn0000568	Eip75B	1.27942
TOR
FBgn0003867	tsl	-1.197
FBgn0261560	Thor	-0.541305
FBgn0026317	Tsc1	-0.275626
FBgn0023169	AMPKalpha	0.420509
Dpp/TGFβ
FBgn0033050	Pngl	-0.582408
FBgn0036134	FoxK	-0.531536
FBgn0003169	put	-0.453641
FBgn0024234	gbb	-0.434649
FBgn0026199	myo	-0.404549
FBgn0263667	Lpt	-0.29996
FBgn0011300	babo	-0.279783
FBgn0025800	Smox	-0.267394
FBgn0024913	Actbeta	0.319407
FBgn0000490	dpp	0.803671
TNF
FBgn0026319	Traf4	-2.71183
FBgn0033667	reb	-1.6663
FBgn0013269	FK506-bp1	-0.944727
FBgn0030941	wgn	0.340851
FBgn0033483	egr	2.69641
Cell-Cell Signalng
FBgn0010395	Itgbn	-2.65357
FBgn0039709	Cad99C	-1.22255
FBgn0265274	Inx3	-0.527508
FBgn0034540	Lrt	-0.273294
FBgn0028427	Ilk	0.671303
FBgn0036688	Fit2	2.12541
Mitochondrial Signaling Components
FBgn0029131	Debcl	0.355197
FBgn0030358	CG10362	0.770845
FBgn0004363	porin	1.04788
Nuclear Signaling Components
FBgn0003346	RanGAP	-1.04365
FBgn0015778	rin	-0.8094
FBgn0004390	RasGAP1	-0.668373
FBgn0039302	Nup358	-0.609987
FBgn0029992	Upf2	-0.293308
NFΚB
FBgn0039488	CG6066	-0.719478
Notch
FBgn0000463	Dl	-1.89483
FBgn0004647	N	-1.57288
FBgn0004837	Su(H)	-0.822915
FBgn0263601	mib1	-0.493143
FBgn0021874	Nle	-0.478303
FBgn0033901	O-fut1	-0.462248
FBgn0039734	Tace	0.323247
FBgn0004197	Ser	0.647964
FBgn0051665	wry	1.21961
Metabolic Enzymes
FBgn0261445	sgl	-0.707382
FBgn0000261	Cat	-0.624182
FBgn0014340	mof	-0.582735
FBgn0261617	nej	-0.375023
FBgn0002778	mnd	3.08314
Unfolded Protein Response
FBgn0031950	Herp	0.326157
Transcription Factors
FBgn0003448	sna	-3.54976
FBgn0003499	sr	-0.913125
FBgn0001319	kn	0.660486
Inusfficient Data to Sort
FBgn0259712	CG42366	-1.72002
FBgn0035733	CG8641	-0.511125
FBgn0034420	CG10737	0.292457
FBgn0036741	CG7510	0.331179
FBgn0037754	CG8500	0.597972
FBgn0040056	CG17698	0.63118
FBgn0030581	CG14408	0.784116
FBgn0047135	CG32276	0.898187
FBgn0261859	CG42788	1.48533
FBgn0039770	CG15537	3.26811

## Sheet: Table S6
Table S6: Genes associated with the ecdysone response that were differentially expressed between 21 and 40 h APF
FlyBase ID	gene	log2 (40 h APF/ 21 h APF)
FBgn0004554	Edg91	-3.24711
FBgn0001078	ftz-f1	-2.44111
FBgn0264490	Eip93F	-1.42884
FBgn0001257	ImpL2	-1.01978
FBgn0000565	Eip71CD	-0.993441
FBgn0004401	Pep	-0.68968
FBgn0001254	ImpE2	-0.553367
FBgn0005640	Eip63E	0.874201
FBgn0000568	Eip75B	1.27942
FBgn0000567	Eip74EF	1.43027
FBgn0004865	Eip78C	3.18844

## Sheet: Table S7
Table S7: Genes associated with axon guidence (GO:0007411) that were differentially expressed between 21 and 40 h APF
FlyBase ID	gene	log2 (40 h APF/ 21 h APF)
Signal Transduction Pathway Components
FBgn0014179	gcm	-6.0533
FBgn0015550	tap	-4.02093
FBgn0028999	nerfin-1	-3.58522
FBgn0004795	retn	-2.72478
FBgn0261963	mid	-2.4208
FBgn0003300	run	-2.33022
FBgn0002573	sens	-1.7375
FBgn0004647	N	-1.57288
FBgn0003053	peb	-1.52298
FBgn0015380	drl	-1.39095
FBgn0005636	nvy	-1.24564
FBgn0014343	mirr	-1.17459
FBgn0001257	ImpL2	-1.01978
FBgn0005624	Psc	-0.895489
FBgn0026402	NiPp1	-0.773827
FBgn0003892	ptc	-0.769921
FBgn0266136	Gyc76C	-0.748208
FBgn0086677	jeb	-0.704664
FBgn0029905	Nf-YC	-0.614115
FBgn0039338	XNP	-0.586161
FBgn0004595	pros	-0.571784
FBgn0003444	smo	-0.560615
FBgn0010300	brat	-0.558681
FBgn0016797	fz2	-0.531818
FBgn0000504	dsx	-0.521703
FBgn0004606	zfh1	-0.465811
FBgn0003169	put	-0.453641
FBgn0001965	Sos	-0.433564
FBgn0013764	Chi	-0.410136
FBgn0024245	dnt	-0.380396
FBgn0016977	spen	-0.365679
FBgn0000320	eya	-0.362117
FBgn0020238	14-3-3epsilon	-0.346702
FBgn0285917	sbb	-0.335162
FBgn0283521	lola	-0.294585
FBgn0263930	dally	-0.282404
FBgn0000499	dsh	-0.278073
FBgn0025800	Smox	-0.267394
FBgn0000307	chif	-0.261555
FBgn0000229	bsk	0.264225
FBgn0004369	Ptp99A	0.309023
FBgn0030941	wgn	0.340851
FBgn0283499	InR	0.374406
FBgn0033987	ckn	0.41104
FBgn0086655	jing	0.477997
FBgn0040068	Vav	0.513606
FBgn0000414	Dab	0.546691
FBgn0000411	D	0.621393
FBgn0034476	Toll-7	0.677364
FBgn0004435	Galphaq	0.696572
FBgn0267978	ap	0.741879
FBgn0261985	Ptpmeg	0.828135
FBgn0001138	grn	0.843036
FBgn0022382	Pka-R2	0.855515
FBgn0041604	dlp	0.884586
FBgn0000253	Cam	0.988901
FBgn0261588	pdm3	1.05917
FBgn0267486	Ptp36E	1.33088
FBgn0264442	ab	1.33516
FBgn0031375	erm	1.68936
FBgn0040505	Alk	1.73088
FBgn0004652	fru	1.93523
FBgn0261526	NT1	2.53541
FBgn0284408	trol	3.07445
Axon Elongation and Morphogenesis
FBgn0003312	sad	-4.07147
FBgn0002873	mud	-2.66861
FBgn0034013	unc-5	-1.29468
FBgn0264273	Sema2b	-1.24691
FBgn0038300	Mau2	-0.881561
FBgn0041171	ago	-0.821238
FBgn0035713	velo	-0.659258
FBgn0034070	SP2353	-0.657864
FBgn0023097	bon	-0.578839
FBgn0011260	Sema2a	-0.569258
FBgn0000017	Abl	-0.52524
FBgn0016059	Sema1b	-0.485944
FBgn0026239	gukh	-0.479446
FBgn0014011	Rac2	-0.426672
FBgn0033438	Mmp2	-0.417694
FBgn0033155	Br140	-0.381923
FBgn0004838	Hrb27C	-0.324689
FBgn0034975	enok	-0.308851
FBgn0011300	babo	-0.279783
FBgn0000239	bur	-0.274393
FBgn0001404	egh	0.306326
FBgn0003888	betaTub60D	0.398817
FBgn0011259	Sema1a	0.399166
FBgn0015797	Rab6	0.414346
FBgn0051352	Unc-115a	0.423307
FBgn0015754	Lis-1	0.451064
FBgn0265974	ttv	0.589452
FBgn0016061	side	0.601563
FBgn0035574	RhoGEF64C	0.709168
FBgn0263120	Acsl	0.727184
FBgn0004380	Klp64D	0.740638
FBgn0051721	Trim9	0.949143
FBgn0267376	SelR	0.975991
FBgn0030090	fend	1.00297
FBgn0011661	Moe	1.0078
FBgn0041160	comm2	1.03479
FBgn0003435	sm	1.08335
FBgn0261563	wb	1.18869
FBgn0004885	tok	1.54444
FBgn0020294	ko	1.72404
FBgn0260660	Mp	3.12988
FBgn0261509	haf	3.50129
Regulation of Adhesion
FBgn0032629	beat-IIIc	-1.07662
FBgn0002306	sas	-0.929674
FBgn0002526	LanA	-0.847281
FBgn0003328	scb	-0.769723
FBgn0003391	shg	-0.286458
FBgn0037240	Cont	-0.283515
FBgn0000635	Fas2	0.509221
FBgn0264975	Nrg	0.574067
FBgn0265607	beat-IIIa	0.636684
FBgn0285925	Fas1	0.644187
FBgn0265296	Dscam2	0.738122
FBgn0015609	CadN	0.798788
FBgn0033159	Dscam1	1.01383
FBgn0010473	tutl	1.03543
FBgn0039089	beat-IV	1.18423
FBgn0038087	beat-Va	1.19425
FBgn0013433	beat-Ia	1.27345
FBgn0053179	beat-IIIb	1.29621
FBgn0263219	Dscam4	1.30286
FBgn0004055	uzip	1.37283
FBgn0028644	beat-Ic	1.75859
FBgn0028645	beat-Ib	1.92588
FBgn0038498	beat-IIa	2.01008
FBgn0265002	CG44153	2.09413
FBgn0004456	mew	2.29865
FBgn0262018	CadN2	2.57097
FBgn0039584	beat-VI	2.77623
FBgn0011722	Tig	3.17635
FBgn0038494	beat-IIb	3.18127
Growth Cone Extension
FBgn0052227	gogo	-1.06475
FBgn0000308	chic	-0.89359
FBgn0028371	jbug	-0.68558
FBgn0010341	Cdc42	-0.279988
FBgn0000578	ena	0.259189
FBgn0014133	bif	0.431697
FBgn0053208	Mical	0.444732
FBgn0041781	SCAR	0.457285
FBgn0264089	sli	0.664769
FBgn0024277	trio	0.767099
FBgn0039883	RhoGAP100F	0.797326
FBgn0015774	NetB	1.097
FBgn0261458	capt	1.46763
FBgn0014141	cher	2.02651
Synaptic Regulation
FBgn0002565	Lsp2	-0.980321
FBgn0041097	robo3	-0.344399
FBgn0266599	Hsc70-4	-0.340215
FBgn0259174	Nedd4	0.28125
FBgn0028500	Rich	0.479277
FBgn0283500	Sac1	0.54227
FBgn0267001	Ten-a	0.647871
FBgn0001114	Glt	0.740353
FBgn0039617	DIP-gamma	0.871654
FBgn0004449	Ten-m	0.920939
FBgn0030887	CG6867	1.02282
FBgn0010105	comm	1.10078
FBgn0002543	robo2	1.10667
FBgn0264006	dysc	1.24586
FBgn0053202	dpr11	1.60885
Axonogenesis
FBgn0028734	Fmr1	-0.277843
FBgn0250789	alpha-Spec	0.309563
FBgn0250788	beta-Spec	0.394987
FBgn0027491	Cdk5alpha	0.462164

## Sheet: Table S8
Table S8: Genes associated with biological adhesion (GO:0022610) that were differentially expressed between 21 and 40 h APF
FlyBase ID	gene	log2 (40 h APF/ 21 h APF)
FBgn0010395	Itgbn	-2.65357
FBgn0034709	Swim	-2.39937
FBgn0035049	Mmp1	-1.77643
FBgn0038247	Cad88C	-1.67022
FBgn0034880	ItgaPS5	-1.60393
FBgn0284247	ds	-1.49694
FBgn0004635	rho	-1.48888
FBgn0036101	NijA	-1.40367
FBgn0026598	Apc2	-1.37957
FBgn0261053	Cad86C	-1.33121
FBgn0250908	beat-VII	-1.32893
FBgn0039709	Cad99C	-1.22255
FBgn0267435	chp	-1.17386
FBgn0026403	Ndg	-1.10992
FBgn0032629	beat-IIIc	-1.07662
FBgn0029082	hbs	-1.03046
FBgn0001257	ImpL2	-1.01978
FBgn0024189	sns	-0.963846
FBgn0001075	ft	-0.957947
FBgn0002306	sas	-0.929674
FBgn0003731	Egfr	-0.916716
FBgn0002526	LanA	-0.847281
FBgn0003328	scb	-0.769723
FBgn0020309	crol	-0.67699
FBgn0003285	rst	-0.552744
FBgn0001987	Gli	-0.483846
FBgn0283724	Girdin	-0.397816
FBgn0021764	sdk	-0.367094
FBgn0029778	RhoGAP5A	-0.352148
FBgn0000163	baz	-0.301901
FBgn0003391	shg	-0.286458
FBgn0037240	Cont	-0.283515
FBgn0026562	SPARC	-0.271861
FBgn0260442	rhea	0.289815
FBgn0015777	nrv2	0.298952
FBgn0001404	egh	0.306326
FBgn0001122	Galphao	0.344128
FBgn0267348	LanB2	0.34763
FBgn0036844	Mkp3	0.402058
FBgn0001624	dlg1	0.427617
FBgn0264491	how	0.43166
FBgn0041781	SCAR	0.457285
FBgn0015229	glec	0.506644
FBgn0000635	Fas2	0.509221
FBgn0001083	fw	0.566211
FBgn0264975	Nrg	0.574067
FBgn0037107	CG7166	0.582888
FBgn0004364	18w	0.584059
FBgn0039928	Cals	0.589272
FBgn0052528	parvin	0.612545
FBgn0265607	beat-IIIa	0.636684
FBgn0285925	Fas1	0.644187
FBgn0028427	Ilk	0.671303
FBgn0039294	Cad96Cb	0.694431
FBgn0265296	Dscam2	0.738122
FBgn0040309	Jafrac1	0.742897
FBgn0015609	CadN	0.798788
FBgn0010434	cora	0.876282
FBgn0083963	Nlg3	0.97653
FBgn0050203	CG30203	0.981738
FBgn0033159	Dscam1	1.01383
FBgn0010473	tutl	1.03543
FBgn0031850	Tsp	1.09259
FBgn0036715	Cad74A	1.11911
FBgn0037963	Cad87A	1.16479
FBgn0039089	beat-IV	1.18423
FBgn0033710	CG17739	1.18891
FBgn0025878	wrapper	1.19089
FBgn0017590	klg	1.19361
FBgn0038087	beat-Va	1.19425
FBgn0022800	Cad96Ca	1.20587
FBgn0013433	beat-Ia	1.27345
FBgn0053179	beat-IIIb	1.29621
FBgn0263219	Dscam4	1.30286
FBgn0050046	CG30046	1.512
FBgn0260745	mfas	1.53025
FBgn0020269	mspo	1.71995
FBgn0028644	beat-Ic	1.75859
FBgn0052183	Ccn	1.8004
FBgn0031866	Nlg2	1.91518
FBgn0028645	beat-Ib	1.92588
FBgn0034972	CG10339	1.99639
FBgn0038498	beat-IIa	2.01008
FBgn0265002	CG44153	2.09413
FBgn0004456	mew	2.29865
FBgn0083975	Nlg4	2.52289
FBgn0262018	CadN2	2.57097
FBgn0085382	CG34353	2.60149
FBgn0026721	fat-spondin	2.61558
FBgn0263038	CG43333	2.76665
FBgn0039584	beat-VI	2.77623
FBgn0260660	Mp	3.12988
FBgn0011722	Tig	3.17635
FBgn0038494	beat-IIb	3.18127
FBgn0263118	tx	3.60676
FBgn0034391	CG15080	4.36712
FBgn0284435	tyn	4.81746
FBgn0028573	prc	4.93095
FBgn0002577	m	5.83703
FBgn0038439	Cad89D	9.36278
FBgn0066365	dyl	10.5265

## Sheet: Table S9
Table S9: Genes associated with cell survival (GO:0010941) that were differentially expressed between 21 and 40 h APF
FlyBase ID	gene	log2 (40 h APF/ 21 h APF)
FBgn0013469	klu	-4.76684
FBgn0032929	Mcm10	-3.70241
FBgn0011704	RnrS	-3.38323
FBgn0026319	Traf4	-2.71183
FBgn0011703	RnrL	-2.56743
FBgn0264291	Det	-2.09798
FBgn0264493	rdx	-1.76909
FBgn0002573	sens	-1.7375
FBgn0004647	N	-1.57288
FBgn0000542	ec	-1.51321
FBgn0019686	lok	-1.40067
FBgn0040308	Jafrac2	-1.25542
FBgn0040075	rept	-1.20044
FBgn0004583	ex	-1.15477
FBgn0278604	dmt	-1.0984
FBgn0003118	pnt	-1.09191
FBgn0010382	CycE	-1.01258
FBgn0001075	ft	-0.957947
FBgn0019972	Drice	-0.935071
FBgn0002306	sas	-0.929674
FBgn0003731	Egfr	-0.916716
FBgn0266377	Pde8	-0.882734
FBgn0003079	Raf	-0.872917
FBgn0026404	Dronc	-0.849454
FBgn0003997	hid	-0.826598
FBgn0284084	wg	-0.801133
FBgn0032682	grnd	-0.784071
FBgn0003892	ptc	-0.769921
FBgn0011763	Dp	-0.76509
FBgn0003607	Su(var)205	-0.757455
FBgn0011766	E2f1	-0.755888
FBgn0011706	rpr	-0.732714
FBgn0024371	E2f2	-0.718981
FBgn0021761	Nup154	-0.70253
FBgn0001324	kto	-0.689084
FBgn0035713	velo	-0.659258
FBgn0025825	HDAC3	-0.650737
FBgn0263933	ebi	-0.646778
FBgn0003205	Ras85D	-0.641367
FBgn0035402	Usp5	-0.637516
FBgn0085451	htk	-0.626158
FBgn0020381	Dredd	-0.613655
FBgn0014340	mof	-0.582735
FBgn0051357	CG31357	-0.582357
FBgn0002576	lz	-0.57742
FBgn0040294	POSH	-0.570955
FBgn0003444	smo	-0.560615
FBgn0261456	hpo	-0.557529
FBgn0038948	PSR	-0.538911
FBgn0086384	Mer	-0.534338
FBgn0026597	Axn	-0.529223
FBgn0015664	Dref	-0.510461
FBgn0002121	l(2)gl	-0.503037
FBgn0011710	Septin-1	-0.493273
FBgn0011785	BRWD3	-0.47832
FBgn0022960	vimar	-0.470942
FBgn0023143	Uba1	-0.449956
FBgn0037760	FBXO11	-0.449026
FBgn0015799	Rbf	-0.447358
FBgn0002719	Men	-0.442188
FBgn0024234	gbb	-0.434649
FBgn0000352	cos	-0.421074
FBgn0033902	eIF3m	-0.405592
FBgn0026199	myo	-0.404549
FBgn0002622	RpS3	-0.394189
FBgn0017579	RpL14	-0.382895
FBgn0000320	eya	-0.362117
FBgn0032749	Phlpp	-0.354345
FBgn0026252	msk	-0.353152
FBgn0020261	pcm	-0.328923
FBgn0035617	l(3)psg2	-0.311966
FBgn0263231	bel	-0.294548
FBgn0036340	SRm160	-0.29059
FBgn0028734	Fmr1	-0.277843
FBgn0261014	TER94	-0.276012
FBgn0285952	eEF5	-0.25955
FBgn0260635	Diap1	-0.251834
FBgn0000108	Appl	0.255556
FBgn0025637	SkpA	0.287941
FBgn0067102	GlcT-1	0.3105
FBgn0024913	Actbeta	0.319407
FBgn0000382	csw	0.323135
FBgn0259152	Clbn	0.323836
FBgn0029131	Debcl	0.355197
FBgn0035871	BI-1	0.361514
FBgn0004436	Ubc6	0.390681
FBgn0023529	CG2918	0.453077
FBgn0037643	skap	0.480835
FBgn0086357	Sec61alpha	0.4846
FBgn0031043	Naa20A	0.486275
FBgn0243512	puc	0.493512
FBgn0015946	grim	0.495237
FBgn0034763	RYBP	0.495832
FBgn0263395	hppy	0.521752
FBgn0283468	slmb	0.551001
FBgn0259176	bun	0.553212
FBgn0041188	Atx2	0.560494
FBgn0000659	fkh	0.575905
FBgn0037481	MAGE	0.580039
FBgn0259108	futsch	0.610736
FBgn0015589	Apc	0.612821
FBgn0000273	Pka-C1	0.621597
FBgn0051005	qless	0.623601
FBgn0038922	Idh3b	0.638443
FBgn0030613	Rab3-GEF	0.67867
FBgn0004435	Galphaq	0.696572
FBgn0032006	Pvr	0.742333
FBgn0087011	CG41520	0.762107
FBgn0000490	dpp	0.803671
FBgn0283531	Duox	0.856417
FBgn0262559	Mdh2	0.873874
FBgn0038816	Lrrk	0.903347
FBgn0004797	mdy	1.0873
FBgn0034894	sigmar	1.09199
FBgn0002567	Rab32	1.13472
FBgn0085397	Fili	1.29716
FBgn0028408	Drep2	1.31073
FBgn0035142	Hipk	1.41156
FBgn0014073	Tie	1.6451
FBgn0030163	CG1791	1.75195
FBgn0024732	Drep1	1.76953
FBgn0052183	Ccn	1.8004
FBgn0263986	cd	1.83245
FBgn0266579	tau	2.15168
FBgn0261526	NT1	2.53541
FBgn0003965	v	2.84047
FBgn0030964	Pvf1	3.07564
FBgn0266137	Dop1R2	3.38292

## Sheet: Table S10
Table S10: Genes associated with muscle structure and development that were differentially expressed between 21 and 40 h APF
FlyBase ID	gene	log2 (40 h APF/ 21 h APF)
Sarcomere Components
FBgn0027889	ball	-1.4834
FBgn0086906	sls	-1.03718
FBgn0265991	Zasp52	-0.812696
FBgn0082582	tmod	-0.458202
FBgn0025391	Scgdelta	1.56164
FBgn0010424	TpnC73F	1.67859
FBgn0036044	Zasp67	2.37593
FBgn0004117	Tm2	3.0587
FBgn0283471	wupA	3.26976
FBgn0002772	Mlc1	3.3584
FBgn0031692	TpnC25D	6.13798
FBgn0013348	TpnC41C	inf
Muscle Integrity and Attachment
FBgn0035539	slow	-1.35168
FBgn0022764	Sin3A	-0.60164
FBgn0024245	dnt	-0.380396
FBgn0026252	msk	-0.353152
FBgn0259745	wech	-0.323437
FBgn0032683	kon	0.468749
FBgn0262126	Sec24CD	0.511651
FBgn0028427	Ilk	0.671303
FBgn0031850	Tsp	1.09259
FBgn0033504	CAP	1.21159
FBgn0264442	ab	1.33516
FBgn0003292	rt	1.59199
FBgn0011653	mas	2.23345
FBgn0004456	mew	2.29865
FBgn0000299	Col4a1	2.90282
FBgn0263118	tx	3.60676
FBgn0016075	vkg	4.30091
Myoblast Fusion
FBgn0029082	hbs	-1.03046
FBgn0004133	blow	-0.966567
FBgn0024189	sns	-0.963846
FBgn0001091	Gapdh1	-0.647448
FBgn0041096	rols	-0.596105
FBgn0003285	rst	-0.552744
FBgn0015513	mbc	0.370886
FBgn0026179	siz	0.371359
FBgn0041781	SCAR	0.457285
FBgn0032409	Ced-12	0.459725
FBgn0044826	Pak3	0.54094
FBgn0014869	Pglym78	1.06195
FBgn0243516	Vrp1	1.30167
FBgn0001258	ImpL3	3.08569
Signal Transduction Components
FBgn0004360	Wnt2	-4.55745
FBgn0002734	E(spl)mdelta-HLH	-3.95977
FBgn0004795	retn	-2.72478
FBgn0011656	Mef2	-2.23053
FBgn0004647	N	-1.57288
FBgn0015380	drl	-1.39095
FBgn0003118	pnt	-1.09191
FBgn0037076	ebd2	-0.990153
FBgn0001235	hth	-0.972706
FBgn0261648	salm	-0.956514
FBgn0003499	sr	-0.913125
FBgn0082598	akirin	-0.886982
FBgn0033649	pyr	-0.862046
FBgn0015919	caup	-0.85659
FBgn0003345	sd	-0.821095
FBgn0284084	wg	-0.801133
FBgn0086677	jeb	-0.704664
FBgn0003205	Ras85D	-0.641367
FBgn0015904	ara	-0.636982
FBgn0005427	ewg	-0.549182
FBgn0261560	Thor	-0.541305
FBgn0010825	Gug	-0.466841
FBgn0000611	exd	-0.435047
FBgn0000320	eya	-0.362117
FBgn0283521	lola	-0.294585
FBgn0266848	wap	-0.294366
FBgn0002973	numb	-0.274615
FBgn0283499	InR	0.374406
FBgn0040068	Vav	0.513606
FBgn0001319	kn	0.660486
FBgn0267978	ap	0.741879
FBgn0015371	chn	0.84772
FBgn0010389	htl	0.851376
FBgn0033652	ths	0.867188
FBgn0262473	Tl	1.59272
FBgn0040505	Alk	1.73088
FBgn0004652	fru	1.93523
Cytoskeletal Interactors
FBgn0086356	tum	-5.14388
FBgn0011692	pav	-3.88183
FBgn0000044	Act57B	-1.87575
FBgn0011674	insc	-0.952191
FBgn0014011	Rac2	-0.426672
FBgn0260049	flr	-0.411428
FBgn0024273	WASp	-0.344563
FBgn0265935	coro	-0.33525
FBgn0260442	rhea	0.289815
FBgn0053208	Mical	0.444732
FBgn0052528	parvin	0.612545
FBgn0267376	SelR	0.975991
FBgn0000667	Actn	1.34365
FBgn0000047	Act88F	1.81258
FBgn0014141	cher	2.02651
Nuclei Migration
FBgn0261836	Msp300	0.315595
FBgn0001316	klar	0.73719
Muscle Differentiation and Development
FBgn0015393	hoip	-0.78459
FBgn0266136	Gyc76C	-0.748208
FBgn0267385	PyK	-0.731993
FBgn0033988	pcs	-0.574379
FBgn0036641	Smn	-0.453768
FBgn0032078	C1GalTA	-0.398035
FBgn0031759	lid	-0.387353
FBgn0037659	Kdm2	-0.31324
FBgn0023212	EloB	0.269872
FBgn0039213	atl	0.395181
FBgn0010591	Sply	0.405267
FBgn0010812	unc-45	0.41839
FBgn0264491	how	0.43166
FBgn0012051	CalpA	0.62648
FBgn0015614	CanB2	0.83055
FBgn0010434	cora	0.876282
FBgn0265487	mbl	0.981239
FBgn0010397	LamC	1.24692
FBgn0000114	bru1	1.32877

[truncated: 3 more sheets: Table S11, Table S12, Table S13]
